# Supplementary material for: Virtual reality perspective-taking increases cognitive empathy for specific others
Source: PLoS One. 2018 Aug 30;13(8):e0202442. doi: 10.1371/journal.pone.0202442 (PMC6116942; doi:10.1371/journal.pone.0202442)
Supplement: S1 File — A .xlsx file with the data that resulted from the time-one questionnaire described in the paper. (XLSX) [file pone.0202442.s005.xlsx]

## Sheet: DARPA_Pre-Screen Updated 24 Apr
ParticipantID	Gender	NonBinaryGender	Race	Latino	SVO_1	SVO_2	SVO_3	SVO_4	SVO_5	SVO_6	SVO_7	SVO_8	SVO_9	NEO_selfish	NEO_courteous	NEO_calculating	NEO_considerate	NEO_generosity	NEO_likeable	NEO_charitable	NEO_helpOthers	PHN_1	PHN_2	PHN_3	PHN_4	PHN_5	PHN_6	PHN_7	PHN_8	PHN_9	PHN_10	PHN_11	PHN_12	PHN_13	PHN_14	IRI_1	IRI_2	IRI_3	IRI_4	IRI_5	IRI_6
R_3KYGzSVrNORvqMB	Yes, Male		American Indian or Alaskan Native	Yes	You: 480 Other: 80	You: 500 Other: 100	You: 520 Other: 120	You: 560 Other: 300	You: 500 Other: 500	You: 500 Other: 500	You: 560 Other: 300	You: 500 Other: 100	You: 490 Other: 490	Strongly disagree	Disagree	Neutral	Agree	Strongly disagree	Disagree	Neutral	Agree	60	39	66	77	28	84	100	50	50	51	15	9	51	51	1	2	3	2	3	3
R_2dDQxV44tQsfVyv	Yes, Female		American Indian or Alaskan Native		You: 480 Other: 80	You: 500 Other: 100	You: 520 Other: 120	You: 500 Other: 100	You: 560 Other: 300	You: 500 Other: 100	You: 560 Other: 300	You: 500 Other: 100	You: 490 Other: 490	Neutral	Neutral	Neutral	Neutral	Neutral	Neutral	Neutral	Neutral	56	58	60	46	51	51	47	43	48	63	61	62	71	71	4	4	4	4	4	4
R_1NEVcj6TsIXt13A	Yes, Female		Asian	No	You: 480 Other: 80	You: 560 Other: 300	You: 520 Other: 520	You: 500 Other: 100	You: 560 Other: 300	You: 500 Other: 500	You: 510 Other: 510	You: 550 Other: 300	You: 480 Other: 100	Disagree	Disagree	Disagree	Disagree	Disagree	Disagree	Disagree	Disagree	52	53	57	82	83	83	59	62	62	63	62	62	62	59	3	3	3	3	3	3
R_3MrKaXW8oxwICrF	Yes, Male		White	No	You: 480 Other: 80	You: 500 Other: 500	You: 520 Other: 120	You: 560 Other: 300	You: 500 Other: 500	You: 500 Other: 100	You: 560 Other: 300	You: 500 Other: 500	You: 540 Other: 300	Strongly disagree	Strongly disagree	Strongly disagree	Strongly disagree	Strongly disagree	Strongly disagree	Strongly disagree	Strongly disagree	43	42	43	58	56	57	57	56	57	57	56	55	56	53	1	1	1	1	1	1
R_29s7c6vNF3HMvoo					You: 540 Other: 280	You: 500 Other: 500	You: 520 Other: 120	You: 560 Other: 300	You: 500 Other: 500	You: 500 Other: 100	You: 560 Other: 300	You: 500 Other: 100	You: 490 Other: 490	Strongly disagree	Strongly disagree	Strongly disagree	Strongly disagree	Strongly disagree	Strongly disagree	Strongly disagree	Strongly disagree	58	60	61	30	33	41	60	57	55	56	55	55	58	55	1	1	1	1	1	1
R_2A0xqcAKYEDiSQg	Yes, Male				You: 480 Other: 80	You: 500 Other: 100	You: 580 Other: 320	You: 490 Other: 490	You: 500 Other: 500	You: 500 Other: 100	You: 560 Other: 300	You: 500 Other: 100	You: 490 Other: 490	Strongly disagree	Strongly disagree	Strongly disagree	Strongly disagree	Strongly disagree	Strongly disagree	Strongly disagree	Strongly disagree	54	55	55	63	59	58	61	57	58	51	46	47	59	57	2	2	2	2	2	2
R_2bKpb4qcfdPn54n					You: 480 Other: 80	You: 500 Other: 100	You: 580 Other: 320	You: 490 Other: 490	You: 490 Other: 90	You: 570 Other: 300	You: 510 Other: 110	You: 500 Other: 500	You: 540 Other: 300	Strongly disagree	Strongly disagree	Strongly disagree	Strongly disagree	Strongly disagree	Strongly disagree	Strongly disagree	Strongly disagree	42	43	43	52	54	55	60	57	58	52	52	53	38	37	2	2	2	3	3	3
R_2aklj7x8DoW4PKf					You: 540 Other: 280	You: 500 Other: 100	You: 520 Other: 120	You: 560 Other: 300	You: 500 Other: 500	You: 500 Other: 100	You: 560 Other: 300	You: 500 Other: 100	You: 490 Other: 490	Strongly disagree	Strongly disagree	Strongly disagree	Strongly disagree	Strongly disagree	Strongly disagree	Strongly disagree	Strongly disagree	41	41	44	56	56	58	51	56	58	59	57	59	64	64	3	3	3	3	3	3
R_3PY5ThUTzx6fe0w		this is a test----ELise and Josh and Austin			You: 540 Other: 280	You: 500 Other: 100	You: 580 Other: 320	You: 560 Other: 300	You: 500 Other: 500	You: 500 Other: 500	You: 560 Other: 300	You: 500 Other: 100	You: 480 Other: 100	Strongly agree	Strongly agree	Strongly agree	Strongly agree	Strongly agree	Strongly agree	Strongly agree	Strongly agree	86	82	82	87	85	85	87	87	87	88	88	88	88	90	5	5	5	5	5	5
R_50luXV603pIFok1	Yes, Female		White	No	You: 540 Other: 280	You: 500 Other: 500	You: 520 Other: 520	You: 560 Other: 300	You: 500 Other: 500	You: 570 Other: 300	You: 560 Other: 300	You: 500 Other: 100	You: 540 Other: 300	Strongly disagree	Strongly disagree	Strongly disagree	Strongly disagree	Disagree	Disagree	Disagree	Disagree	29	67	38	58	38	59	38	63	42	58	35	66	38	68	4	4	4	4	4	4
R_9RMmAYYVuAdLsxb		Elise testing this survey			You: 540 Other: 280	You: 500 Other: 500	You: 520 Other: 120	You: 500 Other: 100	You: 560 Other: 300	You: 500 Other: 500	You: 510 Other: 510	You: 550 Other: 300	You: 480 Other: 100	Strongly agree	Strongly agree	Strongly agree	Strongly agree	Strongly agree	Strongly agree	Strongly agree	Strongly agree	78	75	75	73	74	73	79	74	74	80	74	76	73	72	3	3	3	3	3	3
R_3rIcXWObQKxTB4U					You: 540 Other: 280	You: 500 Other: 500	You: 520 Other: 120	You: 560 Other: 300	You: 500 Other: 500	You: 570 Other: 300	You: 560 Other: 300	You: 500 Other: 500	You: 490 Other: 490	Neutral	Neutral	Neutral	Neutral	Neutral	Neutral	Neutral	Neutral	63	62	57	60	57	57	61	60	60	58	58	57	59	59	3	3	3	3	3	3
R_27fXQ3Xr8xxyimh					You: 540 Other: 280	You: 500 Other: 500	You: 580 Other: 320	You: 560 Other: 300	You: 490 Other: 90	You: 570 Other: 300	You: 510 Other: 110	You: 500 Other: 100	You: 540 Other: 300	Neutral	Neutral	Neutral	Neutral	Neutral	Neutral	Neutral	Neutral	61	57	55	63	62	59	62	61	62	63	63	62	61	59	3	3	3	3	3	3
R_3efBd21UXLE20Gl					You: 540 Other: 280	You: 500 Other: 500	You: 580 Other: 320	You: 490 Other: 490	You: 490 Other: 90	You: 570 Other: 300	You: 510 Other: 110	You: 500 Other: 500	You: 540 Other: 300	Neutral	Neutral	Neutral	Neutral	Neutral	Neutral	Neutral	Neutral	60	62	60	63	57	57	62	59	57	63	61	59	61	62	3	3	3	3	3	3
R_1mtwaX1yqg0qEIK	Yes, Female		Some Other	No	You: 480 Other: 480	You: 500 Other: 500	You: 520 Other: 520	You: 490 Other: 490	You: 500 Other: 500	You: 500 Other: 500	You: 510 Other: 510	You: 500 Other: 500	You: 490 Other: 490	Strongly disagree	Strongly agree	Strongly disagree	Strongly agree	Strongly disagree	Strongly agree	Agree	Agree	63	19	60	62	80	54	70	26	62	59	79	32	73	79	1	1	5	4	4	4
R_bjf2WnTe4znyqg9	Yes, Female		Some Other	Yes	You: 480 Other: 480	You: 500 Other: 500	You: 520 Other: 520	You: 490 Other: 490	You: 500 Other: 500	You: 500 Other: 500	You: 510 Other: 510	You: 550 Other: 300	You: 540 Other: 300	Disagree	Agree	Disagree	Agree	Disagree	Neutral	Neutral	Neutral	26	50	43	75	51	64	77	41	49	83	47	71	73	62	3	2	3	5	4	4
R_2rDiyU2ptHiQcqt	Yes, Male		Asian	No	You: 540 Other: 280	You: 560 Other: 300	You: 580 Other: 320	You: 560 Other: 300	You: 560 Other: 300	You: 570 Other: 300	You: 560 Other: 300	You: 550 Other: 300	You: 540 Other: 300	Neutral	Agree	Neutral	Agree	Neutral	Agree	Agree	Disagree	80	33	53	58	51	40	59	36	28	58	54	55	59	63	2	2	3	4	3	4
R_3e9oiKtncXu8de4	Yes, Female		Asian	No	You: 480 Other: 480	You: 500 Other: 500	You: 520 Other: 520	You: 490 Other: 490	You: 500 Other: 500	You: 500 Other: 500	You: 510 Other: 510	You: 500 Other: 500	You: 490 Other: 490	Strongly disagree	Strongly agree	Strongly disagree	Strongly agree	Strongly disagree	Agree	Agree	Strongly agree	25	40	71	69	70	58	39	68	69	34	76	36	33	20	1	1	5	5	5	4
R_2akR2kSTMUU0gkq	Yes, Male		White	No	You: 540 Other: 280	You: 560 Other: 300	You: 580 Other: 320	You: 560 Other: 300	You: 560 Other: 300	You: 570 Other: 300	You: 560 Other: 300	You: 550 Other: 300	You: 540 Other: 300	Disagree	Strongly agree	Disagree	Strongly agree	Strongly disagree	Agree	Agree	Strongly agree	76	37	57	65	89	47	51	38	59	51	83	53	52	41	4	2	5	5	5	5
R_2dMSmBl2fBhMq7e	Yes, Female		Some Other	No	You: 480 Other: 80	You: 500 Other: 100	You: 520 Other: 120	You: 500 Other: 100	You: 560 Other: 300	You: 570 Other: 300	You: 560 Other: 300	You: 550 Other: 300	You: 540 Other: 300	Neutral	Agree	Neutral	Agree	Neutral	Agree	Neutral	Agree	52	51	51	49	51	49	51	51	51	51	52	52	49	53	3	2	4	4	3	3
R_3MhQeHvBFZI5g1S	Yes, Male		White	No	You: 480 Other: 480	You: 500 Other: 500	You: 520 Other: 520	You: 490 Other: 490	You: 500 Other: 500	You: 500 Other: 500	You: 510 Other: 510	You: 500 Other: 500	You: 490 Other: 490	Neutral	Agree	Neutral	Agree	Neutral	Neutral	Neutral	Agree	72	65	68	70	80	51	40	72	61	50	75	32	40	44	2	2	3	3	2	3
R_3lQXWhKFpIDGmOc	Yes, Male		Black or African-American	No	You: 480 Other: 80	You: 500 Other: 100	You: 520 Other: 120	You: 500 Other: 100	You: 490 Other: 90	You: 500 Other: 100	You: 510 Other: 110	You: 500 Other: 100	You: 480 Other: 100	Neutral	Agree	Disagree	Agree	Neutral	Agree	Agree	Neutral	42	0	65	79	75	76	80	17	74	100	38	63	50	75	3	3	3	4	2	3
R_1hSB3c0tvWvXS6F	Yes, Male		White	No	You: 540 Other: 280	You: 560 Other: 300	You: 580 Other: 320	You: 560 Other: 300	You: 560 Other: 300	You: 570 Other: 300	You: 560 Other: 300	You: 550 Other: 300	You: 540 Other: 300	Agree	Agree	Strongly agree	Agree	Agree	Agree	Agree	Neutral	33	23	55	35	100	23	43	59	61	40	60	36	36	34	3	2	3	5	4	4
R_UbgQ4VEK9hZMSgF	Yes, Female		White	No	You: 480 Other: 480	You: 560 Other: 300	You: 520 Other: 520	You: 560 Other: 300	You: 500 Other: 500	You: 500 Other: 500	You: 510 Other: 510	You: 500 Other: 500	You: 490 Other: 490	Disagree	Agree	Agree	Agree	Disagree	Agree	Neutral	Agree	75	65	85	70	95	40	60	70	46	50	60	51	45	40	2	2	4	4	3	4
R_tLjdG6LOTCig8zn	Yes, Female		White	No	You: 540 Other: 280	You: 560 Other: 300	You: 580 Other: 320	You: 560 Other: 300	You: 560 Other: 300	You: 570 Other: 300	You: 560 Other: 300	You: 550 Other: 300	You: 540 Other: 300	Neutral	Strongly agree	Disagree	Strongly agree	Disagree	Agree	Agree	Strongly agree	60	30	52	75	70	75	56	55	55	63	75	41	45	75	2	2	4	4	4	4
R_3NX9hHbjgAbJiqB	Yes, Female		Asian	No	You: 480 Other: 480	You: 500 Other: 500	You: 520 Other: 520	You: 560 Other: 300	You: 500 Other: 500	You: 500 Other: 500	You: 510 Other: 510	You: 500 Other: 500	You: 540 Other: 300	Disagree	Agree	Disagree	Agree	Disagree	Agree	Neutral	Agree	51	51	51	25	50	30	75	50	75	75	40	40	60	69	2	3	4	4	4	4
R_p3CU0hHHTluZCxz	Yes, Female		Asian	No	You: 540 Other: 280	You: 560 Other: 300	You: 580 Other: 320	You: 560 Other: 300	You: 560 Other: 300	You: 570 Other: 300	You: 560 Other: 300	You: 500 Other: 500	You: 540 Other: 300	Agree	Agree	Agree	Agree	Neutral	Neutral	Neutral	Agree	47	62	40	91	62	55	62	48	47	65	55	52	75	58	3	2	4	4	4	4
R_29soKcCQ1lHWQXk	Yes, Female		White	No	You: 540 Other: 280	You: 500 Other: 500	You: 580 Other: 320	You: 560 Other: 300	You: 500 Other: 500	You: 570 Other: 300	You: 560 Other: 300	You: 550 Other: 300	You: 540 Other: 300	Neutral	Strongly agree	Disagree	Agree	Neutral	Agree	Disagree	Agree	63	40	30	90	40	51	75	44	51	68	25	45	67	100	3	1	4	5	5	5
R_2PnYlvqi6my1tjz	Yes, Female		White	No	You: 540 Other: 280	You: 500 Other: 500	You: 580 Other: 320	You: 560 Other: 300	You: 500 Other: 500	You: 570 Other: 300	You: 560 Other: 300	You: 500 Other: 500	You: 540 Other: 300	Agree	Strongly agree	Disagree	Strongly agree	Disagree	Strongly agree	Agree	Strongly agree	69	30	51	73	75	46	31	72	80	40	85	36	35	37	2	2	5	4	4	4
R_2uCH5SfYj4Cq67o
R_3D0fvESd6LYsA8S	Yes, Female		Some Other	Yes	You: 540 Other: 280	You: 560 Other: 300	You: 580 Other: 320	You: 560 Other: 300	You: 560 Other: 300	You: 570 Other: 300	You: 560 Other: 300	You: 550 Other: 300	You: 540 Other: 300	Disagree	Agree	Neutral	Agree	Neutral	Strongly agree	Neutral	Neutral	85	78	74	97	100	10	35	75	95	15	96	17	40	75	2	1	5	2	2	2
R_vGZiSUZHFEyHjz3	Yes, Female		White	No	You: 540 Other: 280	You: 560 Other: 300	You: 580 Other: 320	You: 560 Other: 300	You: 560 Other: 300	You: 570 Other: 300	You: 560 Other: 300	You: 550 Other: 300	You: 540 Other: 300	Neutral	Agree	Disagree	Strongly agree	Neutral	Agree	Agree	Agree	75	24	66	38	86	84	63	68	69	63	85	43	76	77	3	2	4	4	3	4
R_ZErIpxPf45hIcHD	Yes, Female		White	No	You: 540 Other: 280	You: 500 Other: 100	You: 520 Other: 120	You: 500 Other: 100	You: 490 Other: 90	You: 500 Other: 100	You: 510 Other: 110	You: 500 Other: 100	You: 480 Other: 100	Strongly disagree	Strongly agree	Strongly disagree	Strongly agree	Disagree	Agree	Neutral	Strongly agree	65	50	75	100	65	65	88	42	50	63	76	12	42	99	2	1	4	4	5	5
R_24BqWlTbMluESKh	Yes, Female		White	No	You: 480 Other: 480	You: 500 Other: 500	You: 520 Other: 520	You: 490 Other: 490	You: 500 Other: 500	You: 500 Other: 500	You: 510 Other: 510	You: 500 Other: 500	You: 490 Other: 490	Disagree	Agree	Agree	Strongly agree	Disagree	Neutral	Agree	Agree	60	46	52	63	91	46	67	46	63	64	82	45	54	73	3	2	4	4	3	3
R_2cC2Q9WrZZ07Bet	Yes, Male		American Indian or Alaskan Native	No	You: 540 Other: 280	You: 500 Other: 100	You: 520 Other: 120	You: 560 Other: 300	You: 490 Other: 90	You: 570 Other: 300	You: 560 Other: 300	You: 500 Other: 100	You: 480 Other: 100	Strongly disagree	Strongly disagree	Strongly disagree	Strongly disagree	Strongly disagree	Strongly disagree	Strongly disagree	Strongly disagree	41	64	66	70	59	61	60	61	61	24	61	11	61	62	3	4	5	3	4	4
R_OBuCZ09vfTACWNr	Yes, Male		Some Other	No	You: 480 Other: 480	You: 500 Other: 500	You: 520 Other: 520	You: 490 Other: 490	You: 500 Other: 500	You: 500 Other: 500	You: 510 Other: 510	You: 500 Other: 500	You: 490 Other: 490	Disagree	Agree	Neutral	Agree	Disagree	Agree	Neutral	Neutral	60	40	40	90	60	40	75	75	75	75	30	65	65	89	2	2	4	5	3	3
R_1K7ncfSrWkT39GH	Yes, Female		White	No	You: 540 Other: 280	You: 560 Other: 300	You: 580 Other: 320	You: 560 Other: 300	You: 560 Other: 300	You: 570 Other: 300	You: 560 Other: 300	You: 550 Other: 300	You: 540 Other: 300	Agree	Agree	Agree	Agree	Disagree	Agree	Neutral	Neutral	24	3	30	80	32	35	73	30	17	41	55	58	66	41	4	3	3	3	2	2
R_PtxS2ZcABMlAoiB	Yes, Female		Some Other	Yes	You: 480 Other: 480	You: 500 Other: 500	You: 520 Other: 520	You: 490 Other: 490	You: 500 Other: 500	You: 500 Other: 500	You: 510 Other: 510	You: 500 Other: 500	You: 490 Other: 490	Disagree	Agree	Neutral	Strongly agree	Disagree	Agree	Agree	Agree	75	51	45	72	60	51	51	51	50	48	58	47	50	50	3	2	4	4	4	4
R_RDFZ3UnvLoBtwtz	Yes, Male		Black or African-American	No	You: 480 Other: 480	You: 500 Other: 500	You: 580 Other: 320	You: 490 Other: 490	You: 500 Other: 500	You: 500 Other: 500	You: 510 Other: 510	You: 500 Other: 500	You: 490 Other: 490	Disagree	Strongly agree	Disagree	Strongly agree	Agree	Agree	Agree	Agree	85	20	70	50	30	60	61	70	72	55	85	55	45	75	2	2	4	5	4	5
R_3GAMMuWPsxsl831	Yes, Male		White	No	You: 540 Other: 280	You: 560 Other: 300	You: 580 Other: 320	You: 560 Other: 300	You: 560 Other: 300	You: 570 Other: 300	You: 560 Other: 300	You: 550 Other: 300	You: 540 Other: 300	Agree	Neutral	Agree	Agree	Disagree	Agree	Neutral	Agree	85	10	75	90	90	50	60	40	56	75	75	20	60	60	4	4	2	4	3	3
R_1qg5zWI4yLQ5yle	Yes, Male		White	No	You: 540 Other: 280	You: 560 Other: 300	You: 580 Other: 320	You: 560 Other: 300	You: 560 Other: 300	You: 570 Other: 300	You: 560 Other: 300	You: 550 Other: 300	You: 540 Other: 300	Strongly disagree	Agree	Disagree	Strongly agree	Disagree	Agree	Neutral	Agree	72	71	69	84	70	38	75	26	54	45	73	71	34	68	4	2	4	3	4	4
R_1mF8LBG9L5y2fKX					You: 480 Other: 480	You: 500 Other: 100	You: 520 Other: 120	You: 490 Other: 490	You: 500 Other: 500	You: 500 Other: 500	You: 560 Other: 300	You: 550 Other: 300	You: 490 Other: 490	Strongly agree	Strongly agree	Strongly agree	Strongly agree	Strongly agree	Strongly agree	Strongly agree	Strongly agree	86	86	88	87	87	88	88	87	87	87	88	88	86	87	5	5	5	5	5	5
R_shPplcAOL7fhyPD	Yes, Male		White	Yes	You: 540 Other: 280	You: 560 Other: 300	You: 580 Other: 320	You: 560 Other: 300	You: 560 Other: 300	You: 500 Other: 100	You: 560 Other: 300	You: 500 Other: 100	You: 480 Other: 100	Agree	Strongly agree	Neutral	Strongly agree	Disagree	Strongly agree	Agree	Agree	77	22	34	30	27	64	58	69	60	37	64	27	78	28	4	2	3	4	2	2
R_2Wx64kWC5IRZDoP	Yes, Female		White	No	You: 480 Other: 480	You: 500 Other: 500	You: 520 Other: 520	You: 490 Other: 490	You: 500 Other: 500	You: 500 Other: 500	You: 510 Other: 510	You: 500 Other: 500	You: 490 Other: 490	Disagree	Agree	Disagree	Agree	Agree	Agree	Agree	Agree	72	67	37	65	64	52	58	63	59	41	58	53	53	39	2	3	4	4	3	2
R_32SiWMu6VhjZu8c					You: 540 Other: 280	You: 500 Other: 100	You: 580 Other: 320	You: 490 Other: 490	You: 500 Other: 500	You: 500 Other: 100	You: 510 Other: 110	You: 500 Other: 500	You: 540 Other: 300	Agree	Agree	Agree	Agree	Agree	Agree	Agree	Agree	65	73	79	86	87	89	85	86	89	87	89	90	88	89	5	4	4	5	5	5
R_NXU0MhnzQeFdoJz					You: 540 Other: 280	You: 500 Other: 500	You: 580 Other: 320	You: 560 Other: 300	You: 560 Other: 300	You: 500 Other: 100	You: 560 Other: 300	You: 500 Other: 100	You: 490 Other: 490	Strongly disagree	Strongly disagree	Strongly disagree	Strongly disagree	Strongly disagree	Strongly disagree	Strongly disagree	Strongly disagree	39	62	64	53	63	68	73	75	77	80	82	84	69	71
R_1j9UkkzEQiakALK	Yes, Female			Yes	You: 480 Other: 480	You: 500 Other: 500	You: 520 Other: 520	You: 490 Other: 490	You: 500 Other: 500	You: 500 Other: 500	You: 510 Other: 510	You: 500 Other: 500	You: 490 Other: 490	Agree	Agree	Disagree	Strongly agree	Agree	Agree	Neutral	Disagree	50	17	48	47	95	35	15	56	70	2	53	36	62	85	5	1	5	4	2	2
R_1mkofeFPvjEejGJ	Yes, Female		Asian	No	You: 540 Other: 280	You: 560 Other: 300	You: 580 Other: 320	You: 560 Other: 300	You: 560 Other: 300	You: 570 Other: 300	You: 560 Other: 300	You: 550 Other: 300	You: 540 Other: 300	Neutral	Agree	Disagree	Agree	Agree	Agree	Agree	Agree	75	60	60	75	75	50	40	50	50	25	60	40	50	30	2	1	4	4	4	3
R_cOMzJXmO1Nd3gC5	Yes, Female		Some Other	No	You: 480 Other: 480	You: 500 Other: 500	You: 520 Other: 520	You: 490 Other: 490	You: 500 Other: 500	You: 500 Other: 500	You: 510 Other: 510	You: 500 Other: 100	You: 490 Other: 490	Disagree	Strongly agree	Agree	Strongly agree	Disagree	Neutral	Strongly agree	Strongly agree	73	22	59	18	85	50	30	72	80	35	80	34	44	83	3	2	4	4	3	4
R_wSmATAfilRuLOet	Yes, Male		Black or African-American	No	You: 480 Other: 80	You: 500 Other: 100	You: 520 Other: 120	You: 500 Other: 100	You: 490 Other: 90	You: 500 Other: 100	You: 510 Other: 110	You: 500 Other: 100	You: 480 Other: 100	Neutral	Agree	Neutral	Agree	Neutral	Agree	Agree	Neutral	70	19	71	80	73	85	71	39	65	79	39	69	62	100	3	3	3	5	3	3
R_3kNRBOVNGv7xTkn	Yes, Male		Asian	No	You: 540 Other: 280	You: 500 Other: 500	You: 580 Other: 320	You: 490 Other: 490	You: 500 Other: 500	You: 500 Other: 500	You: 510 Other: 510	You: 500 Other: 500	You: 490 Other: 490	Agree	Disagree	Agree	Agree	Agree	Agree	Neutral	Agree	75	25	42	74	75	75	63	45	51	23	62	75	93	98	4	2	4	4	4	4
R_sBZFyouR4OWKwyB	Yes, Female		White	No	You: 480 Other: 480	You: 500 Other: 500	You: 520 Other: 520	You: 490 Other: 490	You: 500 Other: 500	You: 570 Other: 300	You: 510 Other: 510	You: 500 Other: 500	You: 490 Other: 490	Strongly disagree	Strongly agree	Strongly disagree	Strongly agree	Strongly disagree	Strongly agree	Agree	Strongly agree	48	26	64	42	40	60	61	37	55	58	71	36	60	66	1	1	5	4	4	4
R_1l641sAnHzAqVS3	Yes, Female		White	No	You: 540 Other: 280	You: 560 Other: 300	You: 580 Other: 320	You: 560 Other: 300	You: 560 Other: 300	You: 570 Other: 300	You: 560 Other: 300	You: 550 Other: 300	You: 540 Other: 300	Disagree	Strongly agree	Agree	Strongly agree	Disagree	Strongly agree	Agree	Strongly agree	68	43	77	53	59	62	68	42	60	55	68	45	58	55	2	2	4	4	4	4
R_Twkg47qaYhDgLAd	Yes, Female		Some Other	No	You: 540 Other: 280	You: 560 Other: 300	You: 580 Other: 320	You: 560 Other: 300	You: 560 Other: 300	You: 570 Other: 300	You: 560 Other: 300	You: 550 Other: 300	You: 540 Other: 300	Neutral	Agree	Agree	Agree	Agree	Agree	Disagree	Neutral	25	0	26	76	51	64	73	58	72	75	77	62	68	67	3	2	4	5	5	5
R_szJwQmxh5szzza1	Yes, Female		White	No	You: 480 Other: 80	You: 500 Other: 100	You: 580 Other: 320	You: 500 Other: 100	You: 560 Other: 300	You: 500 Other: 100	You: 510 Other: 110	You: 500 Other: 100	You: 480 Other: 100	Disagree	Agree	Disagree	Agree	Disagree	Agree	Agree	Agree	65	51	65	38	60	45	59	59	60	53	67	37	39	55	2	2	4	4	4	4
R_2A0Z5gB1XgQ7OVz	Yes, Female	gnc, genderqueer	Black or African-American	No	You: 480 Other: 480	You: 500 Other: 500	You: 520 Other: 520	You: 490 Other: 490	You: 500 Other: 500	You: 500 Other: 500	You: 510 Other: 510	You: 500 Other: 500	You: 490 Other: 490	Neutral	Agree	Strongly agree	Strongly agree	Neutral	Neutral	Agree	Neutral	0	80	70	25	95	20	65	30	90	5	75	70	2	65	2	1	4	3	2	3
R_3KGChv3UPpNIqHp	Yes, Male		Black or African-American	No	You: 480 Other: 480	You: 500 Other: 500	You: 520 Other: 520	You: 490 Other: 490	You: 500 Other: 500	You: 500 Other: 500	You: 510 Other: 510	You: 500 Other: 500	You: 490 Other: 490	Strongly disagree	Strongly agree	Agree	Strongly agree	Strongly disagree	Agree	Agree	Strongly agree	22	19	0	36	76	97	99	16	26	100	31	98	100	64	1	1	3	1	3	2
R_2ammP9yoJrRgnU2	Yes, Male		White	No	You: 480 Other: 80	You: 560 Other: 300	You: 520 Other: 120	You: 500 Other: 100	You: 490 Other: 90	You: 500 Other: 100	You: 510 Other: 110	You: 500 Other: 100	You: 480 Other: 100	Disagree	Neutral	Agree	Agree	Disagree	Agree	Agree	Agree	68	20	65	50	63	59	54	39	63	65	57	39	48	47	1	3	4	2	3	4
R_3EGYUqdLEEoaUxo	Yes, Male		Black or African-American	No	You: 480 Other: 480	You: 500 Other: 500	You: 520 Other: 520	You: 490 Other: 490	You: 500 Other: 500	You: 500 Other: 500	You: 510 Other: 510	You: 500 Other: 500	You: 490 Other: 490	Neutral	Strongly agree	Agree	Strongly agree	Agree	Agree	Disagree	Agree	74	62	68	62	71	45	42	58	65	39	70	36	41	40	2	2	4	4	3	2
R_2ZWAFZXHiTKMG5D	Yes, Male		White	Yes	You: 480 Other: 80	You: 500 Other: 100	You: 520 Other: 120	You: 560 Other: 300	You: 560 Other: 300	You: 570 Other: 300	You: 560 Other: 300	You: 550 Other: 300	You: 540 Other: 300	Strongly disagree	Agree	Disagree	Agree	Disagree	Agree	Agree	Agree	71	50	71	63	77	25	39	62	34	37	75	54	24	40	4	4	2	4	4	4
R_XvICoJltaAAwXHX	Yes, Female		White	No	You: 480 Other: 80	You: 500 Other: 100	You: 520 Other: 120	You: 500 Other: 100	You: 490 Other: 90	You: 500 Other: 100	You: 510 Other: 110	You: 500 Other: 100	You: 480 Other: 100	Neutral	Agree	Agree	Strongly agree	Strongly disagree	Agree	Neutral	Agree	34	40	38	60	63	62	59	46	60	60	62	62	75	81	2	2	4	4	3	4
R_3qrtcMoNaWlkKX2	Yes, Female		White	No	You: 540 Other: 280	You: 560 Other: 300	You: 580 Other: 320	You: 560 Other: 300	You: 560 Other: 300	You: 570 Other: 300	You: 560 Other: 300	You: 550 Other: 300	You: 540 Other: 300	Agree	Agree	Agree	Strongly agree	Agree	Neutral	Neutral	Neutral	75	25	37	40	60	49	40	32	41	75	30	73	75	76	4	1	3	5	5	5
R_2q7yjET9oyvAqPu	Yes, Female		White	No	You: 540 Other: 280	You: 500 Other: 500	You: 520 Other: 520	You: 560 Other: 300	You: 500 Other: 500	You: 570 Other: 300	You: 510 Other: 510	You: 500 Other: 500	You: 490 Other: 490	Disagree	Strongly agree	Agree	Agree	Disagree	Strongly agree	Neutral	Agree	50	25	75	39	95	28	51	70	66	24	94	30	74	26	2	2	4	3	2	2
R_b9jrP5UgYG6nm2l					You: 540 Other: 280	You: 500 Other: 100	You: 580 Other: 320	You: 490 Other: 490	You: 500 Other: 500	You: 500 Other: 100	You: 560 Other: 300	You: 500 Other: 100	You: 490 Other: 490	Neutral	Neutral	Neutral	Neutral	Neutral	Neutral	Neutral	Neutral	66	65	64	67	66	65	67	67	67	66	67	65	69	69	3	3	3	3	3	3
R_2TTyN7TGDiOrgbK	Yes, Female		Asian	No	You: 540 Other: 280	You: 560 Other: 300	You: 580 Other: 320	You: 560 Other: 300	You: 560 Other: 300	You: 570 Other: 300	You: 560 Other: 300	You: 550 Other: 300	You: 540 Other: 300	Neutral	Agree	Neutral	Agree	Disagree	Agree	Agree	Neutral	76	39	45	64	52	48	61	52	52	48	48	53	53	53	3	2	4	3	3	3
R_8BRBLYwzYwHEwg1	Yes, Male		White	No	You: 480 Other: 80	You: 500 Other: 100	You: 520 Other: 120	You: 500 Other: 100	You: 490 Other: 90	You: 570 Other: 300	You: 510 Other: 110	You: 500 Other: 100	You: 480 Other: 100	Neutral	Neutral	Agree	Agree	Neutral	Neutral	Neutral	Agree	24	28	5	26	69	73	73	6	55	100	54	87	98	78	3	3	3	3	3	3
R_3ElF238U1MCLXot	Yes, Female		Asian	No	You: 540 Other: 280	You: 500 Other: 500	You: 520 Other: 520	You: 560 Other: 300	You: 500 Other: 500	You: 570 Other: 300	You: 510 Other: 510	You: 500 Other: 500	You: 540 Other: 300	Disagree	Agree	Disagree	Agree	Disagree	Agree	Agree	Agree	71	35	64	64	79	50	58	39	60	58	43	49	62	55	2	2	3	4	4	3
R_3oA5e9lqcyBBK7H
R_11aWYfw7jXLNEYt	Yes, Female		Some Other	Yes	You: 480 Other: 480	You: 500 Other: 500	You: 520 Other: 520	You: 490 Other: 490	You: 500 Other: 500	You: 500 Other: 500	You: 510 Other: 510	You: 500 Other: 500	You: 490 Other: 490	Strongly disagree	Agree	Disagree	Agree	Strongly disagree	Agree	Agree	Agree	42	17	63	27	73	54	62	38	65	69	63	77	62	62	1	1	4	5	4	4
R_1oG4f9pnUkwjFYX
R_27UtmaQz72JI6bh	Yes, Male		Asian	No	You: 540 Other: 280	You: 560 Other: 300	You: 520 Other: 520	You: 560 Other: 300	You: 560 Other: 300	You: 500 Other: 500	You: 510 Other: 510	You: 500 Other: 500	You: 540 Other: 300	Agree	Neutral	Agree	Agree	Disagree	Agree	Neutral	Agree	0	42	89	42	71	59	93	94	72	57	71	36	70	57	2	2	4	5	4	3
R_1KqeU5yIK0HdmSM	Yes, Male		White	No	You: 540 Other: 280	You: 500 Other: 500	You: 520 Other: 520	You: 560 Other: 300	You: 500 Other: 500	You: 500 Other: 500	You: 510 Other: 510	You: 500 Other: 500	You: 490 Other: 490	Neutral	Agree	Disagree	Agree	Strongly disagree	Strongly agree	Strongly agree	Strongly agree	35	50	69	36	35	49	18	39	63	30	38	52	33	16	3	2	5	2	4	3
R_xxfsmSfglC3EZVv	Yes, Female		White	No	You: 480 Other: 480	You: 500 Other: 500	You: 520 Other: 520	You: 490 Other: 490	You: 500 Other: 500	You: 500 Other: 500	You: 510 Other: 510	You: 500 Other: 500	You: 490 Other: 490	Strongly disagree	Strongly agree	Strongly disagree	Strongly agree	Disagree	Agree	Neutral	Neutral	70	40	70	50	95	40	50	60	65	35	65	45	45	55	3	2	4	5	4	4
R_vfppWX1uYzD0Dnj	Yes, Female		White	No	You: 480 Other: 480	You: 500 Other: 500	You: 520 Other: 520	You: 490 Other: 490	You: 500 Other: 500	You: 500 Other: 500	You: 510 Other: 510	You: 500 Other: 500	You: 490 Other: 490	Strongly disagree	Agree	Disagree	Strongly agree	Disagree	Agree	Agree	Agree	50	28	38	63	76	56	41	36	46	50	58	34	50	68	2	2	3	5	4	4
R_WoBdrmUMFfw3oQh	Yes, Male		Some Other	Yes	You: 480 Other: 480	You: 500 Other: 500	You: 520 Other: 520	You: 490 Other: 490	You: 500 Other: 500	You: 500 Other: 500	You: 510 Other: 510	You: 500 Other: 500	You: 490 Other: 490	Disagree	Agree	Neutral	Agree	Disagree	Disagree	Agree	Agree	50	32	31	36	74	34	68	41	66	59	77	55	63	63	3	2	3	4	4	4
R_9vgFSpHDW5oHMcx	Yes, Male		Some Other	Yes	You: 480 Other: 480	You: 500 Other: 500	You: 520 Other: 520	You: 560 Other: 300	You: 500 Other: 500	You: 500 Other: 500	You: 510 Other: 510	You: 500 Other: 500	You: 490 Other: 490	Neutral	Strongly agree	Strongly disagree	Agree	Disagree	Strongly agree	Agree	Agree	75	60	60	15	90	25	51	50	51	80	80	56	35	60	2	2	4	5	3	3
R_pLxVDeS32WZ9q6J	Yes, Female		Black or African-American	No	You: 480 Other: 480	You: 560 Other: 300	You: 580 Other: 320	You: 560 Other: 300	You: 560 Other: 300	You: 570 Other: 300	You: 560 Other: 300	You: 550 Other: 300	You: 540 Other: 300	Neutral	Strongly agree	Agree	Strongly agree	Neutral	Agree	Agree	Neutral	85	15	77	62	75	36	90	66	59	34	43	2	12	56	1	1	5	5	3	2
R_eywYaL6hzPRXOSt	Yes, Female		White	Yes	You: 540 Other: 280	You: 560 Other: 300	You: 580 Other: 320	You: 560 Other: 300	You: 560 Other: 300	You: 570 Other: 300	You: 560 Other: 300	You: 550 Other: 300	You: 540 Other: 300	Disagree	Neutral	Neutral	Agree	Neutral	Neutral	Agree	Agree	67	12	65	85	49	55	66	14	33	100	51	64	90	100	4	4	2	5	2	3
R_2YtwxDeDbWxxXxM	Yes, Male		White	No	You: 540 Other: 280	You: 560 Other: 300	You: 580 Other: 320	You: 560 Other: 300	You: 560 Other: 300	You: 570 Other: 300	You: 560 Other: 300	You: 550 Other: 300	You: 540 Other: 300	Agree	Strongly agree	Agree	Strongly agree	Disagree	Agree	Strongly agree	Strongly agree	50	0	50	51	100	100	100	4	47	100	100	72	100	100	5	2	3	5	5	5
R_vepL2uaV4fFOoyl	Yes, Female		Some Other	Yes	You: 540 Other: 280	You: 560 Other: 300	You: 580 Other: 320	You: 560 Other: 300	You: 560 Other: 300	You: 570 Other: 300	You: 560 Other: 300	You: 550 Other: 300	You: 540 Other: 300	Agree	Strongly agree	Strongly disagree	Agree	Neutral	Agree	Agree	Agree	61	63	70	42	55	39	93	32	40	83	58	55	87	60	3	1	4	4	4	2
R_BFaqWxVaDJ9dNKx	Yes, Female		White	No	You: 540 Other: 280	You: 500 Other: 500	You: 520 Other: 520	You: 560 Other: 300	You: 560 Other: 300	You: 570 Other: 300	You: 510 Other: 510	You: 550 Other: 300	You: 540 Other: 300	Disagree	Strongly agree	Strongly disagree	Strongly agree	Agree	Strongly agree	Strongly disagree	Neutral	85	0	75	54	63	47	65	66	65	29	74	56	42	75	4	3	2	4	3	2
R_2dLztQh65IOz688	Yes, Female			Yes	You: 540 Other: 280	You: 500 Other: 500	You: 520 Other: 520	You: 560 Other: 300	You: 560 Other: 300	You: 500 Other: 500	You: 510 Other: 510	You: 500 Other: 500	You: 540 Other: 300	Disagree	Agree	Neutral	Agree	Disagree	Strongly agree	Neutral	Neutral	75	20	60	47	75	30	55	45	60	35	70	55	55	80	1	2	5	4	3	3
R_2ExWQkk9cCjmVd1	No, I do not identify as male or female	Agender	White	No	You: 480 Other: 480	You: 500 Other: 500	You: 520 Other: 520	You: 490 Other: 490	You: 500 Other: 500	You: 500 Other: 500	You: 510 Other: 510	You: 500 Other: 500	You: 490 Other: 490	Neutral	Agree	Agree	Strongly agree
R_2cpWM3XrbHPtkJv	Yes, Female		American Indian or Alaskan Native	No	You: 480 Other: 480	You: 560 Other: 300	You: 520 Other: 520	You: 560 Other: 300	You: 500 Other: 500	You: 500 Other: 500	You: 510 Other: 510	You: 500 Other: 500	You: 490 Other: 490	Agree	Agree	Disagree	Agree	Neutral	Strongly agree	Agree	Agree	75	90	60	95	75	60	25	30	60	25	60	35	60	75	2	2	4	5	4	5
R_2f2piXUBBflYdHz	Yes, Female		Some Other	Yes	You: 540 Other: 280	You: 560 Other: 300	You: 520 Other: 120	You: 560 Other: 300	You: 560 Other: 300	You: 570 Other: 300	You: 560 Other: 300	You: 550 Other: 300	You: 540 Other: 300	Neutral	Agree	Agree	Agree	Neutral	Strongly agree	Disagree	Neutral	25	0	0	60	50	51	100	0	60	100	25	75	60	100	5	4	2	4	2	1
R_33kFZLhbpC4VjfU	Yes, Female		American Indian or Alaskan Native	Yes	You: 480 Other: 480	You: 560 Other: 300	You: 580 Other: 320	You: 560 Other: 300	You: 560 Other: 300	You: 570 Other: 300	You: 560 Other: 300	You: 550 Other: 300	You: 540 Other: 300	Strongly disagree	Strongly agree	Neutral	Strongly agree	Disagree	Agree	Agree	Agree	75	75	50	100	83	77	65	49	59	51	61	41	70	32	2	2	4	4	5	5
R_1Hq3ZZntF8A2v54	Yes, Male		White	No	You: 480 Other: 80	You: 500 Other: 100	You: 520 Other: 120	You: 500 Other: 100	You: 490 Other: 90	You: 500 Other: 100	You: 510 Other: 110	You: 500 Other: 100	You: 480 Other: 100	Neutral	Agree	Neutral	Agree
R_1LjJy59hgL4UV0C	Yes, Female		White	No	You: 480 Other: 480	You: 500 Other: 500	You: 580 Other: 320	You: 490 Other: 490	You: 500 Other: 500	You: 500 Other: 500	You: 560 Other: 300	You: 500 Other: 500	You: 490 Other: 490	Disagree	Strongly agree	Disagree	Strongly agree	Strongly disagree	Strongly agree	Neutral	Agree	75	25	75	47	100	24	36	49	46	49	67	47	69	67	1	1	4
R_1KiHuBVcjqMjv5s
R_1pyWwbBfD3S7Pne	Yes, Female		Asian	No	You: 540 Other: 280	You: 500 Other: 500	You: 520 Other: 520	You: 560 Other: 300	You: 560 Other: 300	You: 570 Other: 300	You: 510 Other: 510	You: 550 Other: 300	You: 540 Other: 300	Disagree	Agree	Agree	Agree	Neutral	Agree	Agree	Agree	31	31	77	53	88	39	37	69	62	83	90	43	42	69	3	2	4	4	2	2
R_1gBK5BH9appPQda	Yes, Male		White	No	You: 540 Other: 280	You: 500 Other: 100	You: 520 Other: 120	You: 500 Other: 100	You: 560 Other: 300	You: 500 Other: 100	You: 510 Other: 110	You: 500 Other: 100	You: 480 Other: 100	Agree	Strongly agree	Strongly agree	Agree	Disagree	Agree	Neutral	Agree	44	22	75	75	60	30	65	40	40	25	80	50	30	45	1	1	4	5	4	5
R_3gUuhz8ukeQjeaX	Yes, Female		Asian	No	You: 540 Other: 280	You: 560 Other: 300	You: 580 Other: 320	You: 560 Other: 300	You: 560 Other: 300	You: 570 Other: 300	You: 560 Other: 300	You: 550 Other: 300	You: 540 Other: 300	Disagree	Agree	Disagree	Agree	Neutral	Agree	Neutral	Disagree	29	28	50	59	50	40	75	41	42	44	59	43	58	58	4	4	3	4	3	2
R_33d6wwgxu1LPWB4	Yes, Female		White	No	You: 540 Other: 280	You: 560 Other: 300	You: 580 Other: 320	You: 560 Other: 300	You: 560 Other: 300	You: 570 Other: 300	You: 560 Other: 300	You: 550 Other: 300	You: 540 Other: 300	Disagree	Agree	Agree	Strongly agree	Disagree	Strongly agree	Agree	Agree	86	33	88	55	63	39	59	39	81	54	88	63	65	60
R_Oa34lataLl72zKx	Yes, Female		White	Yes	You: 540 Other: 280	You: 560 Other: 300	You: 580 Other: 320	You: 500 Other: 100	You: 560 Other: 300	You: 570 Other: 300	You: 510 Other: 110	You: 500 Other: 100	You: 540 Other: 300	Disagree	Agree	Disagree	Agree	Disagree	Agree	Agree	Strongly agree	65	52	51	50	75	60	65	50	52	50	75	31	40	25	2	2	4	4	5	4
R_6ogQhinNMWyMi8V	Yes, Female		White	No	You: 480 Other: 80	You: 500 Other: 100	You: 520 Other: 120	You: 500 Other: 100	You: 490 Other: 90	You: 500 Other: 100	You: 510 Other: 110	You: 500 Other: 100	You: 480 Other: 100	Neutral	Agree	Neutral	Agree	Disagree	Neutral	Agree	Agree	13	61	14	47	50	55	40	41	50	57	44	68	50	67	2	1	3	5	3	3
R_2BnwKWIjVXyH9j2	Yes, Female		White	No	You: 540 Other: 280	You: 500 Other: 500	You: 520 Other: 520	You: 490 Other: 490	You: 500 Other: 500	You: 500 Other: 500	You: 510 Other: 510	You: 500 Other: 500	You: 490 Other: 490	Disagree	Agree	Neutral	Agree	Neutral	Agree	Agree	Agree	50	50	50	51	77	77	51	55	51	73	57	82	50	52	3	2	4	5	4	4
R_ZFg2wiQQNgU49mV	Yes, Female		Black or African-American	No	You: 480 Other: 480	You: 500 Other: 500	You: 520 Other: 520	You: 490 Other: 490	You: 500 Other: 500	You: 500 Other: 500	You: 510 Other: 510	You: 500 Other: 500	You: 490 Other: 490	Strongly agree	Strongly agree	Strongly agree	Strongly agree	Neutral	Neutral	Disagree	Agree	75	25	67	51	76	26	50	62	75	40	66	42	44	44	2	2	2	5	4	4
R_vjm3CYTKCE3yga5	Yes, Female		Asian	No	You: 480 Other: 480	You: 500 Other: 500	You: 580 Other: 320	You: 560 Other: 300	You: 560 Other: 300	You: 570 Other: 300	You: 560 Other: 300	You: 550 Other: 300	You: 540 Other: 300	Disagree	Agree	Disagree	Strongly agree	Disagree	Agree	Agree	Agree	100	24	49	83	46	77	100	27	20	16	60	60	88	100	2	2	3	3	4	3
R_3n1WbT89NiBTR78
R_3lEA7Dn0P8QgCv4	Yes, Male		White	No	You: 540 Other: 280	You: 560 Other: 300	You: 580 Other: 320	You: 560 Other: 300	You: 560 Other: 300	You: 570 Other: 300	You: 560 Other: 300	You: 550 Other: 300	You: 540 Other: 300	Disagree	Strongly agree	Neutral	Strongly agree	Disagree	Agree	Neutral	Neutral	32	40	36	80	75	64	70	36	37	65	42	80	60	63	2	2	5	4	4	3
R_2CTiRmewXTeUW9J	Yes, Female		Black or African-American	No	You: 480 Other: 480	You: 560 Other: 300	You: 580 Other: 320	You: 560 Other: 300	You: 500 Other: 500	You: 500 Other: 100	You: 510 Other: 510	You: 550 Other: 300	You: 490 Other: 490	Neutral	Agree	Disagree	Agree	Neutral	Disagree	Disagree	Neutral	62	53	54	43	54	54	54	53	59	53	64	45	59	58	2	1	5	3	2	2
R_9L9HW0A8O8IfoBP	Yes, Female		Asian	No	You: 540 Other: 280	You: 500 Other: 500	You: 580 Other: 320	You: 560 Other: 300	You: 500 Other: 500	You: 570 Other: 300	You: 510 Other: 510	You: 500 Other: 500	You: 540 Other: 300	Agree	Agree	Disagree	Agree	Disagree	Agree	Disagree	Agree	71	54	91	89	92	55	18	84	87	23	92	3	12	68	1	1	4	4	4	4
R_sFLS6MgbdUngJ3P	Yes, Male		White	No	You: 480 Other: 480	You: 500 Other: 500	You: 520 Other: 520	You: 490 Other: 490	You: 500 Other: 500	You: 500 Other: 500	You: 510 Other: 510	You: 500 Other: 500	You: 490 Other: 490	Agree	Agree	Neutral	Agree	Disagree	Agree	Neutral	Agree	35	25	75	30	25	25	65	30	80	65	84	60	32	40	4	3	3	4	3	3
R_20NZuJI0WXSMlao	Yes, Male		Some Other	Yes	You: 480 Other: 480	You: 500 Other: 500	You: 520 Other: 520	You: 490 Other: 490	You: 500 Other: 500	You: 500 Other: 500	You: 510 Other: 510	You: 500 Other: 500	You: 490 Other: 490	Strongly agree	Neutral	Neutral	Neutral	Neutral	Neutral	Neutral	Neutral	50	0	25	0	88	26	80	25	51	75	25	75	75	75	3	3	2	5	2	2
R_26kJZwxp9H88cMd	Yes, Male		White	No	You: 540 Other: 280	You: 500 Other: 500	You: 520 Other: 520	You: 490 Other: 490	You: 500 Other: 500	You: 500 Other: 500	You: 510 Other: 510	You: 500 Other: 500	You: 490 Other: 490	Agree	Strongly agree	Strongly agree	Strongly agree	Neutral	Strongly agree	Neutral	Neutral	70	45	60	60	85	75	55	70	75	80	55	55	48	70	3	2	4	5	4	4
R_3JaXpaH5kVy99nz	Yes, Female		Asian	No	You: 540 Other: 280	You: 560 Other: 300	You: 520 Other: 520	You: 560 Other: 300	You: 500 Other: 500	You: 500 Other: 500	You: 510 Other: 510	You: 550 Other: 300	You: 490 Other: 490	Disagree	Agree	Neutral	Agree	Disagree	Agree	Agree	Agree	67	60	66	64	73	83	80	67	79
R_3JsYGpf4eHrBzt1	Yes, Male		White	No	You: 540 Other: 280	You: 560 Other: 300	You: 580 Other: 320	You: 560 Other: 300	You: 560 Other: 300	You: 570 Other: 300	You: 560 Other: 300	You: 550 Other: 300	You: 540 Other: 300	Disagree	Strongly agree	Disagree	Strongly agree	Disagree	Agree	Agree	Agree	73	26	72	51	73	34	31	75	66	41	61	42	54	45	4	4	2	5	5	5
R_UuLMuNY3ELzEWfT	Yes, Female		Some Other	No	You: 480 Other: 480	You: 500 Other: 500	You: 520 Other: 520	You: 490 Other: 490	You: 500 Other: 500	You: 500 Other: 500	You: 510 Other: 510	You: 500 Other: 500	You: 490 Other: 490	Disagree	Agree	Strongly disagree	Strongly agree	Disagree	Agree	Agree	Agree	75	36	36	69	51	62	51	58	58	51	78	52	30	25	1	2	4	5	5	5
R_3KOOsgwJjER8r3f	Yes, Female		Black or African-American	No	You: 540 Other: 280	You: 500 Other: 500	You: 580 Other: 320	You: 560 Other: 300	You: 500 Other: 500	You: 570 Other: 300	You: 560 Other: 300	You: 550 Other: 300	You: 540 Other: 300	Neutral	Agree	Neutral	Agree	Neutral	Agree	Neutral	Agree	59	25	22	35	45	55	57	44	56	56	23	0	57	57	2	2	3	4	3	3
R_032W69C4pnog9IB	Yes, Male		White	No	You: 480 Other: 480	You: 500 Other: 500	You: 520 Other: 520	You: 490 Other: 490	You: 500 Other: 500	You: 500 Other: 500	You: 510 Other: 510	You: 500 Other: 500	You: 490 Other: 490	Disagree	Strongly agree	Agree	Agree	Agree	Disagree	Disagree	Neutral	75	25	60	0	75	55	40	40	67	75	25	40	60	60	4	3	2	4	2	2
R_2y89OLPsMtTwY6v	Yes, Female		White	Yes	You: 480 Other: 480	You: 500 Other: 500	You: 520 Other: 520	You: 490 Other: 490	You: 500 Other: 500	You: 500 Other: 500	You: 510 Other: 510	You: 500 Other: 500	You: 490 Other: 490	Disagree	Agree	Strongly disagree	Strongly agree	Disagree	Agree	Disagree	Agree	82	28	85	15	86	23	24	25	80	34	91	20	26	39	2	2	5	4	4	4
R_1Krna2FaNfSGDSY	Yes, Male		Black or African-American	No	You: 480 Other: 480	You: 500 Other: 500	You: 520 Other: 520	You: 490 Other: 490	You: 500 Other: 500	You: 500 Other: 500	You: 510 Other: 510	You: 500 Other: 500	You: 490 Other: 490	Disagree	Agree	Agree	Strongly agree	Strongly disagree	Agree	Strongly agree	Strongly agree	35	20	24	25	76	25	75	25	63	25	65	45	75	75	1	2	5	4	4	3
R_31Tb04vb8BrbghF	Yes, Male		White	No	You: 540 Other: 280	You: 560 Other: 300	You: 580 Other: 320	You: 560 Other: 300	You: 560 Other: 300	You: 570 Other: 300	You: 560 Other: 300	You: 550 Other: 300	You: 540 Other: 300	Disagree	Agree	Agree	Agree	Disagree	Neutral	Strongly agree	Strongly agree	73	80	55	100	35	65	63	43	49	80	64	55	58	66	1	3	4	4	4	3
R_UrWkum5WhrR1NTj	Yes, Female		Asian	No	You: 540 Other: 280	You: 500 Other: 500	You: 520 Other: 520	You: 560 Other: 300	You: 500 Other: 500	You: 500 Other: 500	You: 510 Other: 510	You: 500 Other: 500	You: 490 Other: 490	Disagree	Strongly agree	Disagree	Strongly agree	Disagree	Agree	Neutral	Agree	80	20	20	25	75	25	100	0	55	10	70	71	74	100	2	1	5	5	4	4
R_3jV5iB6ThikN9ZF	Yes, Female		White	No	You: 480 Other: 480	You: 500 Other: 500	You: 520 Other: 520	You: 490 Other: 490	You: 500 Other: 500	You: 500 Other: 500	You: 510 Other: 510	You: 500 Other: 500	You: 490 Other: 490	Neutral	Strongly agree	Strongly disagree	Agree	Agree	Neutral	Neutral	Strongly disagree	84	0	70	69	100	0	83	33	52	66	66	68	66	99	3	3	3	5	2	1
R_Xk7bToHAEmSz8Qh	Yes, Male		White	No	You: 480 Other: 480	You: 500 Other: 500	You: 520 Other: 520	You: 490 Other: 490	You: 500 Other: 500	You: 500 Other: 500	You: 510 Other: 510	You: 500 Other: 500	You: 490 Other: 490	Disagree	Strongly agree	Disagree	Strongly agree	Disagree	Agree	Neutral	Agree	68	75	57	50	85	73	55	40	30	41	81	15	60	60	2	1	5	1	2	2
R_1cU0u1OYrgjQZse	Yes, Male		Black or African-American	No	You: 540 Other: 280	You: 560 Other: 300	You: 580 Other: 320	You: 560 Other: 300	You: 560 Other: 300	You: 570 Other: 300	You: 560 Other: 300	You: 550 Other: 300	You: 540 Other: 300	Disagree	Agree	Disagree	Neutral	Neutral	Agree	Neutral	Agree	51	30	40	75	55	15	75	25	66	52	80	52	83	100	4	3	2	4	2	2
R_1JF57Pt6KpQ3J0n	Yes, Female		White	No	You: 540 Other: 280	You: 560 Other: 300	You: 580 Other: 320	You: 560 Other: 300	You: 560 Other: 300	You: 570 Other: 300	You: 560 Other: 300	You: 550 Other: 300	You: 540 Other: 300	Disagree	Agree	Disagree	Agree	Disagree	Agree	Neutral	Neutral	70	40	71	53	86	27	71	39	85	39	79	64	76	61	3	2	4	5	2	3
R_1QlPW43jjaFm6EM	Yes, Female		Some Other	Yes	You: 480 Other: 480	You: 500 Other: 500	You: 520 Other: 520	You: 490 Other: 490	You: 500 Other: 500	You: 500 Other: 500	You: 510 Other: 510	You: 500 Other: 500	You: 490 Other: 490	Strongly disagree	Strongly agree	Disagree	Agree	Strongly disagree	Agree	Agree	Agree	75	50	65	60	70	50	50	70	79	25	75	35	60	75	2	2	4	3	4	4
R_3EcnNt1NHaqbC0p	Yes, Female		Asian	No	You: 540 Other: 280	You: 560 Other: 300	You: 520 Other: 520	You: 490 Other: 490	You: 560 Other: 300	You: 500 Other: 500	You: 510 Other: 510	You: 500 Other: 500	You: 490 Other: 490	Disagree	Agree	Neutral	Agree	Disagree	Agree	Agree	Agree	71	74	78	79	70	75	82	78	80	68	88	62	63	69	2	2	3	4	3	4
R_2ziQnFPrOWqm3fm	Yes, Female		Black or African-American	No	You: 480 Other: 480	You: 500 Other: 500	You: 520 Other: 520	You: 490 Other: 490	You: 500 Other: 500	You: 500 Other: 500	You: 510 Other: 510	You: 500 Other: 500	You: 490 Other: 490	Strongly disagree	Strongly agree	Neutral	Strongly agree	Disagree	Agree	Agree	Agree	75	70	70	50	50	50	10	50	80	50	50	50	50	75	2	2	4	4	4	4
R_ApnbgzdqvqyDAKR	Yes, Female		White	Yes	You: 540 Other: 280	You: 560 Other: 300	You: 580 Other: 320	You: 560 Other: 300	You: 560 Other: 300	You: 570 Other: 300	You: 560 Other: 300	You: 550 Other: 300	You: 540 Other: 300	Disagree	Agree	Strongly disagree	Agree	Disagree	Neutral	Neutral	Neutral	84	55	64	51	89	41	20	51	62	45	84	33	45	81	1	1	5	4	3	3
R_12zGSILPC6gjllw	Yes, Female		Asian	No	You: 480 Other: 480	You: 560 Other: 300	You: 520 Other: 520	You: 490 Other: 490	You: 500 Other: 500	You: 500 Other: 100	You: 510 Other: 510	You: 500 Other: 500	You: 490 Other: 490	Disagree	Strongly agree	Disagree	Agree	Disagree	Agree	Agree	Strongly agree	73	71	58	58	74	52	68	41	27	59	72	54	55	58
R_3ma9JAOAZ8jB3GS	Yes, Male		Asian		You: 540 Other: 280	You: 560 Other: 300	You: 580 Other: 320	You: 560 Other: 300	You: 560 Other: 300	You: 570 Other: 300	You: 560 Other: 300	You: 550 Other: 300	You: 540 Other: 300	Disagree	Agree	Neutral	Agree	Strongly disagree	Agree	Agree	Agree	64	25	75	75	100	75	50	62	50	67	50	60	85	84	1	1	4	4	4	4
R_3njiF9sXbI4Ty0w	Yes, Male		Asian	No	You: 540 Other: 280	You: 560 Other: 300	You: 580 Other: 320	You: 560 Other: 300	You: 560 Other: 300	You: 570 Other: 300	You: 560 Other: 300	You: 550 Other: 300	You: 540 Other: 300	Disagree	Strongly agree	Strongly disagree	Agree	Disagree	Agree	Neutral	Agree	75	60	51	40	100	16	60	89	50	30	65	10	65	25	2	3	2	5	2	2
R_3f0QazZAR5NmtZn	Yes, Male		Black or African-American	No	You: 480 Other: 480	You: 500 Other: 500	You: 520 Other: 520	You: 490 Other: 490	You: 500 Other: 500	You: 500 Other: 500	You: 510 Other: 510	You: 500 Other: 500	You: 490 Other: 490	Disagree	Agree	Disagree	Agree	Neutral	Agree	Agree	Agree	69	69	75	41	31	57	54	63	64	57	75	54	56	67	3	4	4	5	5	5
R_YbsHTrHxqVaSaCB	Yes, Female		White	No	You: 480 Other: 480	You: 500 Other: 500	You: 520 Other: 520	You: 560 Other: 300	You: 500 Other: 500	You: 570 Other: 300	You: 560 Other: 300	You: 550 Other: 300	You: 540 Other: 300	Neutral	Agree	Disagree	Agree	Disagree	Agree	Neutral	Agree	76	46	47	75	59	45	45	59	58	54	62	59	55	75	3	1	4	4	3	3
R_ysts4djUfPyh9G9	Yes, Female		White	No	You: 480 Other: 480	You: 560 Other: 300	You: 520 Other: 520	You: 560 Other: 300	You: 500 Other: 500	You: 500 Other: 500	You: 510 Other: 510	You: 500 Other: 500	You: 490 Other: 490	Strongly disagree	Strongly agree	Disagree	Strongly agree	Strongly disagree	Strongly agree	Agree	Agree	76	51	66	86	78	51	42	51	56	61	92	33	76	57	1	4	4	5	4	4
R_Z9STNjQaimHhzbP
R_301BIheZJOrB3CI	Yes, Male		White	No	You: 540 Other: 280	You: 500 Other: 100	You: 580 Other: 320	You: 490 Other: 490	You: 500 Other: 500	You: 570 Other: 300	You: 560 Other: 300	You: 500 Other: 500	You: 490 Other: 490	Strongly agree	Strongly agree	Strongly agree	Strongly agree	Strongly agree	Strongly agree	Strongly agree	Strongly agree	57	63	62	65	62	62	68	67	66	66	65	64	62	62	5	5	5	5	5	5
R_31sze9OStdvvt2K	Yes, Male		White	No	You: 540 Other: 280	You: 560 Other: 300	You: 520 Other: 520	You: 560 Other: 300	You: 560 Other: 300	You: 570 Other: 300	You: 560 Other: 300	You: 500 Other: 500	You: 490 Other: 490	Neutral	Strongly agree	Neutral	Strongly agree	Disagree	Agree	Agree	Agree	83	59	63	46	92	45	44	50	55	22	51	43	47	55	1	2	4	5	4	4
R_3kdfg6IkcrzedDZ	Yes, Male		Some Other	Yes	You: 540 Other: 280	You: 560 Other: 300	You: 580 Other: 320	You: 560 Other: 300	You: 560 Other: 300	You: 570 Other: 300	You: 560 Other: 300	You: 550 Other: 300	You: 540 Other: 300	Neutral	Strongly agree	Agree	Strongly agree	Disagree	Strongly agree	Neutral	Agree	22	10	34	76	84	65	83	51	50	78	80	40	50	85	4	2	2	4	5	5
R_vf3wWCa3SfVqSQ1	Yes, Female		White	No	You: 540 Other: 280	You: 560 Other: 300	You: 580 Other: 320	You: 560 Other: 300	You: 560 Other: 300	You: 570 Other: 300	You: 560 Other: 300	You: 550 Other: 300	You: 540 Other: 300	Agree	Agree	Agree	Agree	Neutral	Neutral	Neutral	Neutral	16	2	34	90	43	39	74	37	27	42	53	63	59	56	4	3	3	3	2	2
R_3khXS5Wm0I3lvfB	Yes, Male		Black or African-American	No	You: 480 Other: 80	You: 500 Other: 100	You: 520 Other: 120	You: 500 Other: 100	You: 490 Other: 90	You: 500 Other: 100	You: 510 Other: 110	You: 500 Other: 100	You: 480 Other: 100	Neutral	Agree	Neutral	Agree
R_21oIWDE6fBJ8S85	Yes, Male		Asian	No	You: 480 Other: 480	You: 500 Other: 500	You: 520 Other: 520	You: 490 Other: 490	You: 500 Other: 500	You: 500 Other: 500	You: 510 Other: 510	You: 500 Other: 500	You: 490 Other: 490	Neutral	Strongly agree	Neutral	Agree	Neutral	Agree	Neutral	Neutral	40	15	55	40	90	35	60	55	80	75	55	30	39	70	3	2	4	4	3	2
R_cVoSAW5a7hfDJOF	Yes, Female		White	No	You: 540 Other: 280	You: 560 Other: 300	You: 580 Other: 320	You: 560 Other: 300	You: 560 Other: 300	You: 570 Other: 300	You: 560 Other: 300	You: 550 Other: 300	You: 540 Other: 300	Strongly disagree	Agree	Disagree	Agree	Disagree	Agree	Neutral	Agree	35	13	42	65	60	60	60	52	57	55	55	70	60	60	3	3	4	2	4	4
R_12L4TbBD0ZbNzWv	Yes, Male		Some Other	No	You: 540 Other: 280	You: 500 Other: 100	You: 580 Other: 320	You: 560 Other: 300	You: 490 Other: 90	You: 570 Other: 300	You: 510 Other: 110	You: 500 Other: 100	You: 540 Other: 300	Strongly agree	Strongly agree	Strongly agree	Strongly agree	Strongly agree	Strongly agree	Strongly agree	Strongly agree	66	63	64	69	64	63	64	61	64	61	63	65	60	62	5	5	5	5	5	5
R_sAMM2IfScVEnCtb	Yes, Female		Some Other	Yes	You: 540 Other: 280	You: 500 Other: 500	You: 520 Other: 120	You: 560 Other: 300	You: 490 Other: 90	You: 500 Other: 100	You: 560 Other: 300	You: 500 Other: 500	You: 540 Other: 300	Strongly disagree	Strongly agree	Strongly disagree	Strongly agree	Strongly disagree	Agree	Agree	Agree	62	45	57	59	47	54	41	56	53	60	52	46	53	45	2	2	4	4	4	4
R_1K8Uf5mNkW4yAqg	Yes, Male		White	No	You: 540 Other: 280	You: 560 Other: 300	You: 580 Other: 320	You: 560 Other: 300	You: 560 Other: 300	You: 570 Other: 300	You: 560 Other: 300	You: 550 Other: 300	You: 540 Other: 300	Disagree	Strongly agree	Neutral	Strongly agree	Disagree	Strongly agree	Agree	Agree	50	25	70	51	80	60	60	36	58	34	75	36	33	58	1	1	4	3	3	3
R_O8e63FbsRh7sAW5	Yes, Female		White	Yes	You: 480 Other: 80	You: 500 Other: 100	You: 520 Other: 120	You: 500 Other: 100	You: 560 Other: 300	You: 570 Other: 300	You: 560 Other: 300	You: 550 Other: 300	You: 540 Other: 300	Neutral	Agree	Disagree	Agree	Disagree	Agree	Agree	Neutral	63	51	42	38	66	52	64	38	44	53	55	43	60	55	3	3	3	4	4	3
R_1gi0kE0KTJYXylF	Yes, Female		White	No	You: 480 Other: 480	You: 500 Other: 500	You: 520 Other: 520	You: 490 Other: 490	You: 500 Other: 500	You: 500 Other: 500	You: 510 Other: 510	You: 500 Other: 500	You: 490 Other: 490	Disagree	Strongly agree	Disagree	Strongly agree	Neutral	Agree	Disagree	Agree	79	74	82	61	88	30	30	52	61	35	80	34	38	68	1	2	4	5	4	4
R_1pyhq3kxciz2UD4	Yes, Male		White	No	You: 540 Other: 280	You: 560 Other: 300	You: 580 Other: 320	You: 560 Other: 300	You: 560 Other: 300	You: 570 Other: 300	You: 560 Other: 300	You: 550 Other: 300	You: 540 Other: 300	Neutral	Agree	Strongly agree	Agree	Disagree	Agree	Neutral	Agree	50	30	85	60	75	40	30	60	30	95	75	31	65	80	4	2	2	3	2	1
R_0TfwSYKcX6Oz3pL	Yes, Male		Black or African-American	No	You: 480 Other: 80	You: 500 Other: 100	You: 520 Other: 520	You: 560 Other: 300	You: 560 Other: 300	You: 570 Other: 300	You: 560 Other: 300	You: 550 Other: 300	You: 540 Other: 300	Disagree	Disagree	Strongly disagree	Disagree	Neutral	Agree	Agree	Neutral	0	63	0	53	53	58	51	48	51	55	51	49	52	45	3	4	3	5	3	4
R_3nc3jmxNveNeeQh	Yes, Female		White	No	You: 540 Other: 280	You: 560 Other: 300	You: 580 Other: 320	You: 560 Other: 300	You: 560 Other: 300	You: 570 Other: 300	You: 560 Other: 300	You: 550 Other: 300	You: 540 Other: 300	Disagree	Agree	Neutral	Agree	Disagree	Agree	Neutral	Agree	82	50	70	39	90	11	43	58	24	24	75	25	24	14	3	2	4	4	3	3
R_9ZZhv7Hc3nyIqOJ	Yes, Female		White	No	You: 480 Other: 480	You: 500 Other: 500	You: 520 Other: 520	You: 560 Other: 300	You: 560 Other: 300	You: 570 Other: 300	You: 510 Other: 510	You: 500 Other: 500	You: 490 Other: 490	Disagree	Strongly agree	Strongly disagree	Strongly agree	Disagree	Agree	Agree	Agree	50	10	70	56	89	51	60	76	65	10	56	32	28	71	1	1	5	4	5	5
R_22tqf3AIrtd4lXf	Yes, Female		Asian	No	You: 540 Other: 280	You: 500 Other: 100	You: 520 Other: 120	You: 500 Other: 100	You: 490 Other: 90	You: 500 Other: 100	You: 510 Other: 110	You: 500 Other: 100	You: 480 Other: 100	Disagree	Agree	Disagree	Agree	Disagree	Agree	Agree	Agree	76	22	69	50	78	36	24	42	77	49	72	32	33	63
R_1mQL04yHKnYOOs8	Yes, Male		Some Other	No	You: 480 Other: 480	You: 500 Other: 500	You: 520 Other: 520	You: 490 Other: 490	You: 500 Other: 500	You: 500 Other: 500	You: 510 Other: 510	You: 500 Other: 500	You: 490 Other: 490	Neutral	Agree	Agree	Agree	Neutral	Agree	Agree	Neutral	61	60	61	66	65	66	64	65	64	63	66	62	59	59	3	4	4	5	5	4
R_ZsnQbcLqLIxMEZr	Yes, Male		White	No	You: 540 Other: 280	You: 500 Other: 100	You: 580 Other: 320	You: 560 Other: 300	You: 560 Other: 300	You: 570 Other: 300	You: 560 Other: 300	You: 550 Other: 300	You: 540 Other: 300	Agree	Neutral	Agree	Strongly agree	Neutral	Agree	Disagree	Strongly agree	26	0	71	92	37	50	90	25	61	15	70	77	85	100	2	2	5	4	2	4
R_3EiMcWq3kcnWy0H	Yes, Female		White	No	You: 480 Other: 480	You: 560 Other: 300	You: 580 Other: 320	You: 490 Other: 490	You: 560 Other: 300	You: 570 Other: 300	You: 510 Other: 510	You: 550 Other: 300	You: 540 Other: 300	Disagree	Agree	Neutral	Strongly agree	Neutral	Agree	Neutral	Agree	60	38	58	84	78	74	60	39	80	41	60	54	58	84	5	3	2	4	3	2
R_2z5tYBBzJgsMNh6	Yes, Male		Hawaiian Northern & Pacific Islander	No	You: 480 Other: 480	You: 500 Other: 500	You: 520 Other: 520	You: 490 Other: 490	You: 500 Other: 500	You: 500 Other: 500	You: 510 Other: 510	You: 500 Other: 500	You: 490 Other: 490	Disagree	Strongly disagree	Disagree	Strongly disagree	Disagree	Strongly agree	Strongly agree	Strongly agree	68	67	69	57	54	57	51	93	71	38	69	34	58	55	2	3	4	3	3	4
R_1f6FD7XPp1BDp0e	Yes, Male		Black or African-American	No	You: 540 Other: 280	You: 500 Other: 500	You: 520 Other: 520	You: 560 Other: 300	You: 500 Other: 500	You: 500 Other: 500	You: 510 Other: 510	You: 550 Other: 300	You: 490 Other: 490	Agree	Agree	Agree	Strongly agree	Neutral	Agree	Agree	Agree	70	40	75	80	93	70	43	62	80	59	84	63	61	75	3	3	4	3	4	4
R_1DLUcXLu6hmuQOZ	Yes, Male		Black or African-American	No	You: 540 Other: 280	You: 500 Other: 500	You: 520 Other: 520	You: 560 Other: 300	You: 500 Other: 500	You: 570 Other: 300	You: 510 Other: 510	You: 500 Other: 500	You: 540 Other: 300	Strongly disagree	Strongly agree	Agree	Strongly agree	Neutral	Agree	Agree	Strongly agree	41	11	59	34	34	63	65	66	62	21	77	51	67	86	4	4	2	5	2	4
R_3j10NgbMFTE13DL
R_25KI1oQ6Of4pmw2	Yes, Male		Asian	No	You: 480 Other: 480	You: 500 Other: 500	You: 520 Other: 520	You: 490 Other: 490	You: 500 Other: 500	You: 500 Other: 500	You: 510 Other: 510	You: 500 Other: 500	You: 490 Other: 490	Agree	Strongly agree	Agree	Strongly agree	Disagree	Strongly agree	Agree	Agree	85	15	50	90	90	25	85	60	70	45	95	64	50	29	3	3	4	5	4	4
R_1jAGC6tauDM0JZo
R_a5UmYdCWb6I2ait	Yes, Female		White	No	You: 480 Other: 480	You: 500 Other: 500	You: 580 Other: 320	You: 490 Other: 490	You: 500 Other: 500	You: 500 Other: 500	You: 560 Other: 300	You: 500 Other: 500	You: 490 Other: 490	Disagree	Strongly agree	Disagree	Agree	Disagree	Agree	Agree	Agree
R_riLd1AC6LG5Cbzb	Yes, Male		White	No	You: 480 Other: 480	You: 500 Other: 500	You: 520 Other: 520	You: 490 Other: 490	You: 500 Other: 500	You: 500 Other: 500	You: 510 Other: 510	You: 500 Other: 500	You: 490 Other: 490	Disagree	Agree	Disagree	Strongly agree	Agree	Agree	Agree	Agree	64	24	40	60	45	50	75	45	74	36	25	60	61	75	4	2	4	2	3	2
R_A4JMk9k53oRUeKB	Yes, Male		Black or African-American	No	You: 480 Other: 480	You: 500 Other: 500	You: 520 Other: 520	You: 490 Other: 490	You: 500 Other: 500	You: 500 Other: 500	You: 510 Other: 510	You: 500 Other: 500	You: 490 Other: 490	Disagree	Agree	Neutral	Agree	Neutral	Agree	Neutral	Neutral	0	60	54	56	80	80	81	62	66	10	67	34	76	72	3	2	2	4	3	4
R_24eNqBp2RycoPqP	Yes, Female		Hawaiian Northern & Pacific Islander	No	You: 540 Other: 280	You: 500 Other: 500	You: 520 Other: 520	You: 560 Other: 300	You: 500 Other: 500	You: 500 Other: 500	You: 510 Other: 510	You: 500 Other: 500	You: 490 Other: 490	Agree	Agree	Agree	Agree	Disagree	Agree	Neutral	Neutral	50	33	37	54	87	45	51	60	53	40	62	35	56	51	2	2	3	4	4	4
R_PMWSmuRI6IN0E6J	Yes, Male		White	No	You: 540 Other: 280	You: 500 Other: 500	You: 580 Other: 320	You: 560 Other: 300	You: 560 Other: 300	You: 570 Other: 300	You: 560 Other: 300	You: 550 Other: 300	You: 540 Other: 300	Disagree	Strongly agree	Agree	Strongly agree	Disagree	Agree	Agree	Neutral	40	20	35	65	45	70	70	55	45	70	60	90	70	59	1	1	5	4	2	3
R_2w7AXn5cPKQ8c1v	Yes, Male		White	No	You: 540 Other: 280	You: 560 Other: 300	You: 580 Other: 320	You: 560 Other: 300	You: 560 Other: 300	You: 570 Other: 300	You: 560 Other: 300	You: 550 Other: 300	You: 540 Other: 300	Disagree	Agree	Agree	Agree	Disagree	Strongly agree	Agree	Neutral	60	38	66	59	60	67	63	56	60	60	62	34	37	40	2	2	4	4	3	3
R_82JWstkmybhjMwV	Yes, Female		Asian	No	You: 540 Other: 280	You: 500 Other: 500	You: 520 Other: 520	You: 560 Other: 300	You: 500 Other: 500	You: 500 Other: 500	You: 510 Other: 510	You: 500 Other: 500	You: 490 Other: 490	Neutral	Agree	Neutral	Agree	Neutral	Agree	Agree	Agree	65	25	59	50	100	27	38	43	67	34	65	50	38	31	2	2	4	4	4	4
R_2tg8nQw4QBwVf1V	Yes, Male		Asian	No	You: 480 Other: 480	You: 500 Other: 500	You: 520 Other: 520	You: 490 Other: 490	You: 500 Other: 500	You: 500 Other: 500	You: 510 Other: 510	You: 500 Other: 500	You: 490 Other: 490	Neutral	Agree	Agree	Agree	Disagree	Neutral	Agree	Agree	24	13	64	73	73	75	41	33	46	86	76	34	58	89	2	2	4	4	4	4
R_122Mt8kBJ9zyZwO	Yes, Male		Black or African-American	Yes	You: 480 Other: 480	You: 560 Other: 300	You: 520 Other: 120	You: 560 Other: 300	You: 560 Other: 300	You: 570 Other: 300	You: 560 Other: 300	You: 550 Other: 300	You: 540 Other: 300	Disagree	Agree	Neutral	Agree	Disagree	Agree	Agree	Agree	65	55	50	76	96	13	66	58	72	15	53	36	73	36	1	1	4	4	4	4
R_2ONDMvwhWzdPdcK	Yes, Male		White	No	You: 480 Other: 480	You: 500 Other: 500	You: 520 Other: 520	You: 490 Other: 490	You: 500 Other: 500	You: 500 Other: 500	You: 510 Other: 510	You: 500 Other: 500	You: 490 Other: 490	Neutral	Agree	Neutral	Strongly agree	Disagree	Agree	Agree	Agree	25	20	15	85	25	100	86	34	31	80	25	75	85	80	2	2	4	2	5	5
R_1mwn6ZANoFTYRyO	Yes, Male		White	No	You: 480 Other: 480	You: 500 Other: 500	You: 520 Other: 520	You: 490 Other: 490	You: 500 Other: 500	You: 500 Other: 500	You: 510 Other: 510	You: 500 Other: 500	You: 490 Other: 490	Disagree	Agree	Disagree	Agree	Neutral	Agree	Agree	Agree	60	25	40	30	80	66	60	35	80	20	65	71	41	89	2	2	3	4	5	4
R_3iQhrTFuENBeink	Yes, Male		White	Yes	You: 540 Other: 280	You: 560 Other: 300	You: 580 Other: 320	You: 560 Other: 300	You: 560 Other: 300	You: 570 Other: 300	You: 560 Other: 300	You: 550 Other: 300	You: 540 Other: 300	Neutral	Agree	Agree	Agree	Neutral	Neutral	Agree	Agree	51	19	39	51	15	49	58	20	51	66	26	40	65	66	2	4	3	3	3	4
R_1FFKetjiKqIHnHU	Yes, Female		White	No	You: 480 Other: 480	You: 500 Other: 500	You: 520 Other: 520	You: 490 Other: 490	You: 500 Other: 500	You: 500 Other: 500	You: 510 Other: 510	You: 500 Other: 500	You: 490 Other: 490	Disagree	Agree	Agree	Agree	Disagree	Agree	Agree	Agree	48	26	47	23	66	38	58	51	57	51	53	55	53	75	2	1	5	4	4	4
R_3MagQxD45PrRIQj	Yes, Female		White	No	You: 540 Other: 280	You: 500 Other: 100	You: 520 Other: 120	You: 560 Other: 300	You: 490 Other: 90	You: 500 Other: 100	You: 510 Other: 110	You: 500 Other: 100	You: 480 Other: 100	Neutral	Agree	Neutral	Agree	Strongly disagree	Agree	Agree	Agree	57	33	59	42	59	60	69	42	65	82	88	60	71	90	2	2	3	5	3	3
R_3PiZPgDj1EoZ38J	Yes, Male		Some Other	No	You: 480 Other: 480	You: 500 Other: 100
R_3lPsq9oc90yhxWJ	Yes, Male		Some Other	No	You: 540 Other: 280	You: 500 Other: 500	You: 520 Other: 520	You: 490 Other: 490	You: 500 Other: 500	You: 500 Other: 500	You: 510 Other: 510	You: 500 Other: 500	You: 490 Other: 490	Agree	Agree	Agree	Neutral	Agree	Neutral	Disagree	Disagree	51	25	26	26	69	8	75	70	68	67	82	24	22	74	4	1	2	5	5	5
R_1GDGmyd1GgGOLZA			Asian	No	You: 540 Other: 280	You: 500 Other: 100	You: 520 Other: 120	You: 560 Other: 300	You: 490 Other: 90	You: 570 Other: 300	You: 560 Other: 300	You: 500 Other: 100	You: 540 Other: 300	Neutral	Agree	Neutral	Agree	Neutral	Neutral	Agree	Agree	65	23	48	57	58	57	53	34	62	41	53	35	62	100	4	2	3	4	4	3
R_a3qN6zVBJDdlOet	Yes, Female
R_3kk53aZY3PzONaQ	Yes, Female		Some Other	Yes	You: 480 Other: 80	You: 500 Other: 100	You: 520 Other: 120	You: 500 Other: 100	You: 490 Other: 90	You: 500 Other: 100	You: 510 Other: 110	You: 500 Other: 100
R_TtkowkBk77RTCdr	Yes, Female		Asian	No	You: 480 Other: 480	You: 500 Other: 500	You: 520 Other: 520	You: 490 Other: 490	You: 500 Other: 500	You: 500 Other: 500	You: 510 Other: 510	You: 500 Other: 500	You: 490 Other: 490	Agree	Strongly agree	Strongly agree	Agree	Neutral	Disagree	Disagree	Agree	72	60	44	23	50	44	55	48	61	88	87	65	27	50	3	2	3	5	5	3
R_9ELPJ9IqLsb6uWd	Yes, Female		White	No	You: 480 Other: 480	You: 500 Other: 500	You: 520 Other: 520	You: 490 Other: 490	You: 500 Other: 500	You: 500 Other: 500	You: 510 Other: 510	You: 500 Other: 500	You: 490 Other: 490	Strongly disagree	Strongly agree	Disagree	Strongly agree	Strongly disagree	Agree	Agree	Strongly agree	83	69	85	55	87	22	81	52	76	48	89	31	37	57	1	1	2	5	3	4
R_2cBdeWOGIH000lW	Yes, Male		White		You: 540 Other: 280	You: 500 Other: 500	You: 580 Other: 320	You: 560 Other: 300	You: 560 Other: 300	You: 570 Other: 300	You: 560 Other: 300	You: 550 Other: 300	You: 540 Other: 300	Neutral	Agree	Neutral	Agree	Disagree	Strongly agree	Agree	Agree	61	34	56	84	72	43	71	72	72	76	72	78	54	60	3	3	2	5	3	4
R_2tcQVEWga3Au0Rb	Yes, Female		American Indian or Alaskan Native	No	You: 480 Other: 480	You: 500 Other: 500	You: 520 Other: 520	You: 490 Other: 490	You: 500 Other: 500	You: 500 Other: 500	You: 510 Other: 510	You: 500 Other: 500	You: 490 Other: 490	Disagree	Neutral	Disagree	Strongly agree	Neutral	Agree	Disagree	Strongly agree	67	62	64	10	92	4	16	71	80	8	95	2	8	51	1	1	5	4	4	4
R_PuN8nZdls2YYL61	Yes, Female		White	No	You: 480 Other: 480	You: 500 Other: 500	You: 520 Other: 520	You: 490 Other: 490	You: 500 Other: 500	You: 500 Other: 500	You: 510 Other: 510	You: 500 Other: 500	You: 490 Other: 490	Disagree	Agree	Agree	Agree	Strongly disagree	Agree	Neutral	Agree	87	40	60	33	90	65	61	30	69	58	81	63	65	75	4	2	4	2	2	2
R_30w8up7aUWnqu8V	Yes, Female		White	No	You: 480 Other: 480	You: 500 Other: 500	You: 520 Other: 520	You: 490 Other: 490	You: 500 Other: 500	You: 500 Other: 500	You: 510 Other: 510	You: 500 Other: 500	You: 490 Other: 490	Strongly disagree	Strongly agree	Disagree	Strongly agree	Strongly disagree	Strongly agree	Agree	Strongly agree	70	25	70	40	85	60	65	70	85	70	75	70	65	70	2	2	5	5	3	3
R_3lL9F96vVHZzx6P	Yes, Female		White	Yes
R_3fH6zh8RQCV5V0T	Yes, Female		Asian	No	You: 540 Other: 280	You: 560 Other: 300	You: 520 Other: 520	You: 560 Other: 300	You: 560 Other: 300	You: 570 Other: 300	You: 560 Other: 300	You: 550 Other: 300	You: 540 Other: 300	Disagree	Strongly agree	Strongly agree	Strongly agree	Disagree	Strongly agree	Agree	Agree	100	40	100	37	36	65	58	44	79	65	65	68	37	59	3	5	5	5	4	2
R_2rZbx9oVKD5Ye1k	Yes, Male		White	No	You: 540 Other: 280	You: 560 Other: 300	You: 580 Other: 320	You: 560 Other: 300	You: 560 Other: 300	You: 570 Other: 300	You: 560 Other: 300	You: 550 Other: 300	You: 540 Other: 300	Agree	Strongly agree	Agree	Neutral	Agree	Agree	Disagree	Disagree	58	26	49	54	85	25	73	37	25	58	36	31	59	50
R_BxHCHiX9Q0CIm65	Yes, Male		White	No	You: 480 Other: 80	You: 560 Other: 300	You: 580 Other: 320	You: 560 Other: 300	You: 560 Other: 300	You: 570 Other: 300	You: 560 Other: 300	You: 550 Other: 300	You: 540 Other: 300	Strongly disagree	Agree	Neutral	Agree	Disagree	Agree	Agree	Strongly agree	25	51	75	61	51	51	64	40	65	25	61	37	39	40	2	2	5	3	4	4
R_1eJexZZ9mFxtMri	Yes, Female		Asian	No	You: 540 Other: 280	You: 560 Other: 300	You: 580 Other: 320	You: 560 Other: 300	You: 560 Other: 300	You: 570 Other: 300	You: 560 Other: 300	You: 500 Other: 500	You: 540 Other: 300	Disagree	Agree	Disagree	Agree	Agree	Neutral	Agree	Agree	65	21	59	60	51	57	39	29	58	55	82	55	38	15	2	2	4	4	4	3
R_5mSF2FV05Ewx4Bj	Yes, Female		White	No	You: 480 Other: 80	You: 560 Other: 300	You: 580 Other: 320	You: 560 Other: 300	You: 560 Other: 300	You: 570 Other: 300	You: 560 Other: 300	You: 550 Other: 300	You: 540 Other: 300	Disagree	Strongly agree	Disagree	Agree	Disagree	Agree	Agree	Agree	72	29	66	36	78	63	65	67	71	76	67	30	24	26	3	2	4	4	4	4
R_1gpBsY4LEBx17DE	Yes, Female		Black or African-American	No	You: 540 Other: 280	You: 560 Other: 300	You: 580 Other: 320	You: 560 Other: 300	You: 560 Other: 300	You: 570 Other: 300	You: 560 Other: 300	You: 550 Other: 300	You: 540 Other: 300	Disagree	Agree	Disagree	Agree	Disagree	Agree	Agree	Agree	39	37	45	65	48	57	52	53	53	44	45	44	44	61	2	2	4	4	4	4
R_1Lj0cSGcXX0PA2s	Yes, Male		White	No	You: 540 Other: 280	You: 560 Other: 300	You: 580 Other: 320	You: 560 Other: 300	You: 560 Other: 300	You: 570 Other: 300	You: 560 Other: 300	You: 550 Other: 300	You: 540 Other: 300	Disagree	Agree	Disagree	Agree	Disagree	Strongly agree	Neutral	Neutral	51	52	53	67	66	61	58	59	57	57	57	57	56	56	2	2	3	4	4	4
R_2qqJRgfUpm6Mlaa	Yes, Male		Asian	No	You: 480 Other: 80	You: 500 Other: 100	You: 520 Other: 120	You: 500 Other: 100	You: 490 Other: 90	You: 500 Other: 100	You: 510 Other: 110	You: 500 Other: 100	You: 480 Other: 100	Agree	Agree	Strongly agree	Agree	Strongly agree	Agree	Neutral	Agree	75	60	75	50	95	60	80	0	91	86	90	100	36	100	2	2	4	4	2	1
R_5bidfZNloYnA6Zz	Yes, Female		White	No	You: 540 Other: 280	You: 560 Other: 300	You: 520 Other: 520	You: 490 Other: 490	You: 560 Other: 300	You: 570 Other: 300	You: 510 Other: 510	You: 500 Other: 500	You: 490 Other: 490	Disagree	Strongly agree	Strongly disagree	Strongly agree	Neutral	Strongly agree	Agree	Neutral	74	0	26	37	65	74	35	46	82	64	83	53	79	30	4	1	5	4	4	2
R_2SGqtvgvyoEzL0e	Yes, Male		White	Yes
R_1eOZjlOGaqyGTLT	Yes, Male		White	No
R_1n0C8jDvL5LipoM	Yes, Male		White		You: 540 Other: 280	You: 560 Other: 300	You: 580 Other: 320	You: 560 Other: 300	You: 560 Other: 300	You: 570 Other: 300	You: 560 Other: 300	You: 550 Other: 300	You: 540 Other: 300	Disagree	Agree	Agree	Agree	Neutral	Agree	Disagree	Neutral	40	10	68	25	66	37	76	59	59	100	40	41	61	18	3	4	2	4	2	2
R_306sB5RDUphkOHM	Yes, Male		White	No
R_1n7W4HfijRhEnvX	Yes, Male		Asian	No	You: 480 Other: 480	You: 500 Other: 500	You: 520 Other: 520	You: 490 Other: 490	You: 500 Other: 500	You: 500 Other: 500	You: 510 Other: 510	You: 500 Other: 500	You: 490 Other: 490	Agree	Agree	Agree	Agree	Disagree	Neutral	Agree	Agree	90	21	40	30	69	75	72	30	28	66	19	76	34	29	5	2	2	5	5	4
R_bBB4jP2Fp5hyic1	Yes, Female		Asian	No	You: 540 Other: 280	You: 560 Other: 300	You: 580 Other: 320	You: 560 Other: 300	You: 560 Other: 300	You: 570 Other: 300	You: 560 Other: 300	You: 550 Other: 300	You: 540 Other: 300	Neutral	Agree	Agree	Agree	Neutral	Neutral	Disagree	Neutral	40	30	35	40	65	65	67	40	58	58	60	75	65	65	3	3	2	4	3	3
R_3G0QZugGC2PNGb9	Yes, Female		Black or African-American	No	You: 480 Other: 480	You: 500 Other: 500	You: 520 Other: 520	You: 490 Other: 490	You: 500 Other: 500	You: 500 Other: 500	You: 510 Other: 510	You: 500 Other: 500	You: 490 Other: 490	Strongly disagree	Agree	Strongly disagree	Agree	Disagree	Agree	Agree	Agree	25	55	40	70	55	40	40	45	54	25	76	54	52	43	3	2	3	4	3	3
R_2R4jDau1V2hrQYy	Yes, Male		White	No
R_1FK6PridVYZstJk	Yes, Male		White	No	You: 480 Other: 480	You: 500 Other: 500	You: 580 Other: 320	You: 490 Other: 490	You: 500 Other: 500	You: 500 Other: 500	You: 510 Other: 510	You: 500 Other: 500	You: 540 Other: 300	Neutral	Agree	Agree	Agree	Neutral	Neutral	Neutral	Agree	66	20	66	36	74	36	58	66	41	40	60	48	44	40
R_VW6iD1JhOxFQ7e1	Yes, Male		White	No	You: 540 Other: 280	You: 500 Other: 100	You: 580 Other: 320	You: 500 Other: 100	You: 560 Other: 300	You: 570 Other: 300	You: 560 Other: 300	You: 550 Other: 300	You: 540 Other: 300	Agree	Strongly agree	Agree	Strongly agree	Neutral	Agree	Neutral	Neutral	40	2	61	76	72	58	43	48	39	69	83	51	45	65	3	3	3	3	3	3
R_3Mta16mpvDgROQH	Yes, Male		White	No	You: 540 Other: 280	You: 560 Other: 300	You: 580 Other: 320	You: 560 Other: 300	You: 560 Other: 300	You: 570 Other: 300	You: 560 Other: 300	You: 550 Other: 300	You: 540 Other: 300	Neutral	Strongly agree	Agree	Agree	Strongly disagree	Neutral	Agree	Agree	49	43	55	52	54	41	62	47	67	58	66	34	56	59	4	2	4	4	4	3
R_6J35ukkYuRXJ1BL	Yes, Female		Black or African-American	No	You: 540 Other: 280	You: 560 Other: 300	You: 580 Other: 320	You: 560 Other: 300	You: 560 Other: 300	You: 570 Other: 300	You: 560 Other: 300	You: 550 Other: 300	You: 540 Other: 300	Neutral	Strongly agree	Disagree	Agree	Disagree	Agree	Agree	Strongly agree	72	52	53	82	91	80	74	38	79	70	60	48	71	81	1	1	3	3	4	4
R_2qb19NNZCzgka9L	No, I do not identify as male or female	Genderfluid.	White	No	You: 540 Other: 280	You: 560 Other: 300	You: 580 Other: 320	You: 560 Other: 300	You: 560 Other: 300	You: 570 Other: 300	You: 560 Other: 300	You: 550 Other: 300	You: 540 Other: 300	Neutral	Agree	Strongly agree	Strongly agree	Neutral	Agree	Neutral	Disagree	0	28	0	38	60	100	100	0	20	100	0	63	73	100	5	5	1	4	3	2
R_1n132U9KN9JI0Or	Yes, Male		Black or African-American	No	You: 480 Other: 480	You: 500 Other: 500	You: 520 Other: 520	You: 490 Other: 490	You: 500 Other: 500	You: 500 Other: 500	You: 510 Other: 510	You: 500 Other: 500	You: 490 Other: 490	Neutral	Agree	Strongly agree	Agree	Disagree	Strongly agree	Agree	Agree	26	16	72	100	82	1	100	70	27	9	0	66	100	68	1	1	1	4	4	4
R_31HtdP0zZognwhx	Yes, Female		White	No
R_1CJ6uXIX7jBj1bK	Yes, Female		White	No	You: 540 Other: 280	You: 500 Other: 500	You: 520 Other: 520	You: 560 Other: 300	You: 500 Other: 500	You: 500 Other: 500	You: 510 Other: 510	You: 550 Other: 300	You: 490 Other: 490	Strongly disagree	Strongly agree	Strongly disagree	Strongly agree	Strongly disagree	Agree	Agree	Strongly agree	25	19	24	87	72	24	67	29	59	69	39	63	64	71	1	1	5	5	5	3
R_264KAMZXoyLBbtG	Yes, Female		Asian	No	You: 480 Other: 480	You: 500 Other: 500	You: 520 Other: 520	You: 490 Other: 490	You: 500 Other: 500	You: 500 Other: 500	You: 510 Other: 510	You: 500 Other: 500	You: 490 Other: 490	Neutral	Strongly agree	Disagree	Strongly agree	Disagree	Agree	Agree	Strongly agree	78	21	73	69	73	30	58	68	57	38	78	27	68	36	1	1	3	4	4	4
R_3JlNTdafomti48q	Yes, Female		Asian	No	You: 540 Other: 280	You: 500 Other: 100	You: 580 Other: 320	You: 500 Other: 100	You: 560 Other: 300	You: 570 Other: 300	You: 560 Other: 300	You: 550 Other: 300	You: 540 Other: 300	Agree	Agree	Strongly disagree	Strongly agree	Disagree	Agree	Strongly agree	Strongly agree	65	16	37	40	43	83	76	21	26	75	40	42	62	70	2	1	3	5	5	5
R_1kY2hqzfSkFyEmt	Yes, Male		Asian	No
R_pN7GgJ0FJztFghb	Yes, Female		White	No	You: 540 Other: 280	You: 560 Other: 300	You: 580 Other: 320	You: 490 Other: 490	You: 560 Other: 300	You: 570 Other: 300	You: 560 Other: 300	You: 550 Other: 300	You: 490 Other: 490	Strongly disagree	Strongly agree	Disagree	Strongly agree	Strongly disagree	Strongly agree	Agree	Strongly agree	76	82	51	51	51	51	61	42	51	65	80	67	76	51	1	2	5	5	4	4
R_DAgTUSX8cHGcIjD	Yes, Male		White	No	You: 540 Other: 280	You: 560 Other: 300	You: 580 Other: 320	You: 560 Other: 300	You: 500 Other: 500	You: 500 Other: 500	You: 510 Other: 510	You: 500 Other: 500
R_1PbF84BELvjBEwb
R_1QJAMsA9FOnUAyS	Yes, Female		Asian	No	You: 480 Other: 80	You: 500 Other: 100	You: 520 Other: 120	You: 500 Other: 100	You: 490 Other: 90	You: 500 Other: 100	You: 510 Other: 110	You: 500 Other: 100	You: 480 Other: 100	Disagree	Strongly agree	Strongly disagree	Strongly agree	Strongly disagree	Agree	Agree	Strongly agree	88	81	77	56	76	64	36	69	72	38	70	34	35	60	1	1	3	5	4	3
R_VVa37l9oU1OUU4V	Yes, Female		White	Yes	You: 540 Other: 280	You: 500 Other: 500	You: 580 Other: 320	You: 560 Other: 300	You: 560 Other: 300	You: 570 Other: 300	You: 560 Other: 300	You: 550 Other: 300	You: 540 Other: 300	Disagree	Agree	Neutral	Agree	Disagree	Agree	Agree	Agree	70	25	60	60	95	75	40	70	30	30	60	85	60	70	1	2	4	5	5	3
R_11ZRrkTspiCwxW0	Yes, Male		Some Other	No	You: 540 Other: 280	You: 560 Other: 300	You: 520 Other: 120	You: 560 Other: 300	You: 560 Other: 300	You: 570 Other: 300	You: 560 Other: 300	You: 500 Other: 100	You: 540 Other: 300	Neutral	Strongly agree	Disagree	Strongly agree	Strongly disagree	Agree	Agree	Agree	51	50	25
R_qCQqllbEvPeMgX7	Yes, Female		White	No	You: 480 Other: 480	You: 500 Other: 500	You: 580 Other: 320	You: 490 Other: 490	You: 560 Other: 300	You: 500 Other: 500	You: 560 Other: 300	You: 500 Other: 100	You: 540 Other: 300	Strongly agree	Strongly agree	Agree	Agree	Disagree	Agree	Neutral	Neutral	63	47	48	64	91	53	50	43	65	46	46	53	63	46	2	2	3	4	4	4
R_1mfNysUEQ0TMtBi	Yes, Male		White	Yes	You: 540 Other: 280	You: 500 Other: 100	You: 520 Other: 120	You: 490 Other: 490	You: 490 Other: 90	You: 500 Other: 100	You: 560 Other: 300	You: 500 Other: 100	You: 480 Other: 100	Neutral	Agree	Agree	Agree	Disagree	Agree	Agree	Agree	60	14	24	26	76	26	36	29	40	56	70	60	60	80	3	2	1	5	2	2
R_27D4TvgGCBHyzBM	Yes, Male		Hawaiian Northern & Pacific Islander	No	You: 480 Other: 80	You: 500 Other: 100	You: 580 Other: 320	You: 500 Other: 100	You: 490 Other: 90	You: 500 Other: 100	You: 510 Other: 110	You: 500 Other: 100	You: 480 Other: 100	Disagree	Strongly agree	Disagree	Strongly agree	Neutral	Agree	Agree	Strongly agree	35	35	38	52	51	50	50	67	64	41	24	51	52	55	5	1	3	3	3	3
R_ssPWRFPAUlbVBPr	Yes, Male		White	No	You: 480 Other: 480	You: 500 Other: 500	You: 520 Other: 520	You: 490 Other: 490	You: 500 Other: 500	You: 500 Other: 500	You: 510 Other: 510	You: 500 Other: 500	You: 490 Other: 490	Strongly disagree	Agree	Disagree	Strongly agree	Strongly disagree	Strongly agree	Strongly agree	Strongly agree	30	20	60	91	40	90	72	32	32	91	59	43	85	70	2	1	5	4	5	3
R_2tgLyGfR2a3vxe8	Yes, Male		White	No	You: 540 Other: 280	You: 560 Other: 300	You: 580 Other: 320	You: 560 Other: 300	You: 560 Other: 300	You: 570 Other: 300	You: 560 Other: 300	You: 550 Other: 300	You: 540 Other: 300	Agree	Neutral	Disagree	Agree	Neutral	Agree	Disagree	Disagree	71	4	70	77	81	89	66	51	25	77	23	53	35	89	4	4	2	3	2	2
R_30818pZazWXT3Pi	Yes, Female		Black or African-American	No	You: 540 Other: 280	You: 500 Other: 500	You: 520 Other: 520	You: 490 Other: 490	You: 500 Other: 500	You: 500 Other: 500	You: 510 Other: 510	You: 500 Other: 500	You: 490 Other: 490	Strongly disagree	Agree	Disagree	Strongly agree	Strongly disagree	Strongly agree	Agree	Agree	68	0	27	41	81	19	85	29	21	58	31	77	40	98	1	1	4	4	4	3
R_ujIkU9EhYwJsRFv	Yes, Female		Asian	No	You: 540 Other: 280	You: 560 Other: 300	You: 520 Other: 520
R_9RXRVR8MmsyZQhH	Yes, Male		Asian	No	You: 480 Other: 480	You: 500 Other: 500	You: 520 Other: 520	You: 490 Other: 490	You: 500 Other: 500	You: 500 Other: 500	You: 510 Other: 510	You: 500 Other: 500	You: 490 Other: 490	Disagree	Agree	Neutral	Strongly agree	Strongly disagree	Agree	Agree	Strongly agree	77	36	64	44	71	36	68	39	65	63	74	42	61	74	1	1	4	4	4	4
R_3GCJY5aqtTCZNmx	Yes, Female		White	No	You: 540 Other: 280	You: 560 Other: 300	You: 580 Other: 320	You: 560 Other: 300	You: 560 Other: 300	You: 570 Other: 300	You: 560 Other: 300	You: 550 Other: 300	You: 540 Other: 300	Neutral	Strongly agree	Disagree	Strongly agree	Neutral	Agree	Agree	Agree
R_2Y99YDf3G5EWjJh	Yes, Male		Some Other	Yes	You: 480 Other: 80	You: 500 Other: 100	You: 520 Other: 120	You: 560 Other: 300	You: 560 Other: 300	You: 570 Other: 300	You: 560 Other: 300	You: 550 Other: 300	You: 540 Other: 300	Disagree	Strongly agree	Agree	Strongly agree	Disagree	Strongly agree	Strongly agree	Agree	70	40	64	80	80	66	58	48	78	87	56	76	70	100	2	2	1	5	5	5
R_1CkKd6kKuHfVUbD	Yes, Male		Asian	No	You: 540 Other: 280	You: 500 Other: 500	You: 520 Other: 520	You: 560 Other: 300	You: 560 Other: 300	You: 570 Other: 300	You: 510 Other: 510	You: 500 Other: 500	You: 540 Other: 300	Strongly disagree	Strongly agree	Neutral	Strongly agree	Strongly disagree	Strongly agree	Strongly agree	Strongly agree	18	18	22	91	29	23	26	24	25	21	17	28	88	69	3	3	3	3	3	3
R_1mw45eUFplmbbna	Yes, Male		Asian	No	You: 480 Other: 480	You: 500 Other: 500	You: 520 Other: 520	You: 490 Other: 490	You: 500 Other: 500	You: 500 Other: 500	You: 510 Other: 510	You: 500 Other: 500	You: 490 Other: 490	Disagree	Agree	Disagree	Strongly agree	Neutral	Neutral	Agree	Agree	70	0	50	50	100	50	30	20	50	50	70	50
R_1CyFOyQvNmaC8XD	Yes, Male		Asian	No	You: 540 Other: 280	You: 560 Other: 300	You: 580 Other: 320	You: 560 Other: 300	You: 500 Other: 500	You: 500 Other: 500	You: 560 Other: 300	You: 500 Other: 500	You: 490 Other: 490	Agree	Strongly agree	Strongly agree	Agree	Disagree	Neutral	Agree	Agree	70	35	65	60	65	45	85	35	65	20	65	70	60	70	4	4	2	3	2	2
R_2Ynx89z5HvdaOSj	Yes, Male		Asian	No	You: 540 Other: 280	You: 560 Other: 300	You: 580 Other: 320	You: 560 Other: 300	You: 560 Other: 300	You: 570 Other: 300	You: 510 Other: 110	You: 500 Other: 100	You: 540 Other: 300	Strongly disagree	Agree	Agree	Strongly agree	Strongly disagree	Agree	Agree	Agree	35	33	49	72	74	63	67	34	54	50	60	53	50	66	3	2	4	3	3	3
R_3r0RbGgtTT2MVtn	Yes, Male		White	No	You: 480 Other: 480	You: 560 Other: 300	You: 520 Other: 520
R_1GUkrP1a7soo3Nn	Yes, Male		Black or African-American	No	You: 480 Other: 480	You: 500 Other: 500	You: 520 Other: 520	You: 490 Other: 490	You: 500 Other: 500	You: 500 Other: 500	You: 510 Other: 510	You: 500 Other: 500	You: 490 Other: 490	Agree	Strongly agree	Agree	Strongly agree	Agree	Agree	Neutral	Agree	52	52	75	37	51	76
R_27CDYJxbevgrMjJ	Yes, Male		Black or African-American	No	You: 480 Other: 80	You: 500 Other: 500	You: 520 Other: 520	You: 560 Other: 300	You: 500 Other: 500	You: 500 Other: 500	You: 510 Other: 510	You: 550 Other: 300	You: 490 Other: 490	Disagree	Agree	Disagree	Agree	Disagree	Agree	Agree	Agree	47	0	40	68	100	81	74	48	36	67	62	58	70	67	2	2	4	5	1	2
R_237CdVlEDwJmHz3	Yes, Male		Black or African-American	No	You: 540 Other: 280	You: 500 Other: 100	You: 580 Other: 320	You: 560 Other: 300	You: 560 Other: 300	You: 500 Other: 100	You: 560 Other: 300	You: 500 Other: 100	You: 480 Other: 100	Disagree	Agree	Agree	Agree	Disagree	Agree	Agree	Agree	60	17	39	42	20	38	63	64	67	77	70	73	73	100	2	2	3	3	3	3
R_1mCP4H87jw9xIdx	Yes, Male		Black or African-American	No	You: 480 Other: 80	You: 500 Other: 100	You: 520 Other: 120	You: 500 Other: 100	You: 490 Other: 90	You: 570 Other: 300	You: 510 Other: 110	You: 500 Other: 100	You: 480 Other: 100	Disagree	Agree	Disagree	Agree	Disagree	Strongly agree	Agree	Neutral	51	30	100	51	58	38	56	58	0	68	95	84	50	65	5	2	2	4	3	5
R_2ctF8J3sAVLqxR2	Yes, Male		White	No	You: 480 Other: 480	You: 500 Other: 500	You: 520 Other: 520	You: 490 Other: 490	You: 500 Other: 500	You: 500 Other: 500	You: 510 Other: 510	You: 500 Other: 500	You: 490 Other: 490	Disagree	Agree	Neutral	Agree	Disagree	Agree	Agree	Agree	67	40	38	63	38	77	65	66	67	39	64	65	38	38	3	2	4	4	3	4
R_TuvWj7drWA0sXMB	Yes, Male		Black or African-American	No	You: 480 Other: 80	You: 560 Other: 300	You: 580 Other: 320	You: 560 Other: 300	You: 560 Other: 300	You: 570 Other: 300	You: 560 Other: 300	You: 550 Other: 300	You: 540 Other: 300	Disagree	Agree	Agree	Agree	Strongly disagree	Agree	Neutral	Disagree	26	24	15	38	22	47	34	42	18	38	16	36	36	21	3	3	4	2	3	4
R_W05A92JK19oA0s9
R_2tJwIev6ehmRmKH	Yes, Male		Black or African-American	No	You: 480 Other: 80	You: 500 Other: 100	You: 520 Other: 120	You: 500 Other: 100	You: 490 Other: 90	You: 500 Other: 100	You: 510 Other: 110	You: 500 Other: 100	You: 480 Other: 100	Disagree	Agree	Agree	Agree	Neutral	Strongly agree	Agree	Agree	25	0	61	0	74	80	33	58	62	45	58	25	51	100	5	5	3	3	3	3
R_3M6xddDceno1UDY	Yes, Male
R_3oRZwLHxtRvnwxq
R_1H2DA5LKQy16xil	Yes, Male		White	No	You: 540 Other: 280	You: 560 Other: 300	You: 580 Other: 320	You: 560 Other: 300	You: 560 Other: 300	You: 570 Other: 300	You: 560 Other: 300	You: 550 Other: 300	You: 540 Other: 300	Disagree	Agree	Agree	Agree	Neutral	Agree	Neutral	Neutral	73	0	40	60	76	60	59	40	60	73	70	70	50	73	2	3	3	4	3	3
R_zYB6SeL8nJWH33z	Yes, Male		Asian	No	You: 540 Other: 280	You: 500 Other: 500	You: 520 Other: 120	You: 500 Other: 100	You: 490 Other: 90	You: 500 Other: 100	You: 510 Other: 110	You: 500 Other: 100	You: 480 Other: 100	Agree	Strongly agree	Neutral	Agree	Strongly disagree	Agree	Agree	Agree	22	28	21	78	73	71	75	69	70	76	28	33	75	74	1	4	4	5	5	4
R_WpWhdvrQfqmopjP	Yes, Male		Black or African-American	No	You: 540 Other: 280	You: 560 Other: 300	You: 520 Other: 120	You: 560 Other: 300	You: 490 Other: 90	You: 500 Other: 100	You: 560 Other: 300	You: 550 Other: 300	You: 480 Other: 100	Disagree	Agree	Neutral	Agree	Disagree	Agree	Agree	Agree	51	75	28	62	50	14	78	19	46	52	75	65	47	51	2	2	2	4	5	3
R_qznNXTTo4OhWCA1	Yes, Female		White	No	You: 480 Other: 480	You: 500 Other: 500	You: 520 Other: 520	You: 490 Other: 490	You: 500 Other: 500	You: 500 Other: 500	You: 510 Other: 510	You: 500 Other: 500	You: 490 Other: 490	Disagree	Agree	Strongly disagree	Strongly agree	Disagree	Agree	Agree	Strongly agree	70	25	70	60	75	100	25	30	90	25	90	0	25	0	2	1	5	4	5	5
R_sEWynhbZ6BVTQCl	Yes, Male		Asian	No	You: 480 Other: 480	You: 500 Other: 500	You: 520 Other: 520	You: 490 Other: 490	You: 500 Other: 500	You: 500 Other: 500	You: 510 Other: 510	You: 500 Other: 500	You: 490 Other: 490	Disagree	Agree	Agree	Agree	Disagree	Agree	Agree	Agree	25	30	51	75	60	75	69	10	51	90	70	10	75	100	2	3	3	5	3	4
R_2aQd4ckxoQFU2fA	Yes, Male		Black or African-American	No	You: 480 Other: 480	You: 500 Other: 500	You: 520 Other: 520	You: 490 Other: 490	You: 500 Other: 500	You: 500 Other: 500	You: 510 Other: 510	You: 500 Other: 500	You: 490 Other: 490	Disagree	Agree	Agree	Agree	Disagree	Agree	Agree	Neutral	75	26	32	34	90	32	86	41	70	65	87	34	62	88	1	3	2	5	3	4
R_2wzspZbWFLnmRhV	Yes, Male		White	No	You: 480 Other: 480	You: 500 Other: 500	You: 520 Other: 520	You: 490 Other: 490	You: 500 Other: 500	You: 500 Other: 500	You: 510 Other: 510	You: 500 Other: 500	You: 490 Other: 490	Disagree	Strongly agree	Neutral	Strongly agree	Disagree	Neutral	Neutral	Strongly agree	25	45	50	50	61	55	65	50	60	50	45	55	55	65	1	1	3	4	4	5
R_2Slf8ZHeHMqyu73	Yes, Female		White	Yes	You: 540 Other: 280	You: 560 Other: 300	You: 580 Other: 320	You: 560 Other: 300	You: 560 Other: 300	You: 570 Other: 300	You: 560 Other: 300	You: 550 Other: 300	You: 540 Other: 300	Disagree	Agree	Strongly agree	Agree	Neutral	Agree	Agree	Agree	70	25	75	75	60	30	25	80	75	75	85	75	60	80	3	4	1	5	2	4
R_QcW3snLw8RdEOn7	Yes, Male		Black or African-American	No	You: 480 Other: 480	You: 560 Other: 300	You: 520 Other: 520	You: 560 Other: 300	You: 500 Other: 500	You: 500 Other: 500	You: 510 Other: 110	You: 550 Other: 300	You: 490 Other: 490	Disagree	Agree	Neutral	Agree	Neutral	Strongly agree	Agree	Strongly agree	63	57	51	64	76	100	75	57	64	62	67	57	55	80	3	3	2	4	3	3
R_1GJEj8hbBTDcvWl	Yes, Male		Black or African-American	No	You: 480 Other: 80	You: 500 Other: 100	You: 520 Other: 120	You: 500 Other: 100	You: 560 Other: 300	You: 500 Other: 100	You: 510 Other: 110	You: 500 Other: 100	You: 480 Other: 100	Disagree	Strongly agree	Neutral	Strongly agree	Agree	Strongly agree	Agree	Agree	55	11	68	50	86	30
R_vSHpo5KVIw7CPYZ	Yes, Male		Black or African-American	No	You: 540 Other: 280	You: 560 Other: 300	You: 580 Other: 320	You: 560 Other: 300	You: 560 Other: 300	You: 570 Other: 300	You: 560 Other: 300	You: 550 Other: 300	You: 540 Other: 300	Disagree	Agree	Neutral	Agree	Agree	Strongly agree	Agree	Agree	25	57	23	69	94	80	86	11	30	57	76	53	78	86	2	2	1	5	4	4
R_3EEZQUWiYlWldc9	Yes, Male		White	No	You: 540 Other: 280	You: 500 Other: 500	You: 520 Other: 520	You: 490 Other: 490	You: 560 Other: 300	You: 570 Other: 300	You: 560 Other: 300	You: 500 Other: 500	You: 540 Other: 300	Agree	Agree	Agree	Neutral	Neutral	Neutral	Neutral	Neutral	75	25	25	60	73	25	52	53	24	53	75	40	51	40	2	2	2	4	4	3
R_2EAzOyuUx0TSATL	Yes, Male		White	No	You: 540 Other: 280	You: 560 Other: 300	You: 580 Other: 320	You: 560 Other: 300	You: 560 Other: 300	You: 570 Other: 300	You: 560 Other: 300	You: 550 Other: 300	You: 540 Other: 300	Neutral	Strongly agree	Neutral	Strongly agree	Strongly disagree	Agree	Agree	Strongly agree	75	25	51	65	75	85	75	62	38	25	75	60	75	100	1	1	4	4	3	4
R_3M068zX7AzD3Heu	Yes, Male		Black or African-American	No	You: 540 Other: 280	You: 560 Other: 300	You: 580 Other: 320	You: 560 Other: 300	You: 560 Other: 300	You: 570 Other: 300	You: 560 Other: 300	You: 550 Other: 300	You: 540 Other: 300	Disagree	Strongly agree	Disagree	Agree	Neutral	Agree	Agree	Agree	50	61	90	75	75	50	74	73	62	92	65	55	7	89	3	2	3	4	4	4
R_1LnS7mRCXkSqTii	Yes, Male		Black or African-American	No	You: 540 Other: 280	You: 560 Other: 300	You: 520 Other: 120	You: 560 Other: 300	You: 500 Other: 500	You: 570 Other: 300	You: 560 Other: 300	You: 550 Other: 300	You: 490 Other: 490	Agree	Agree	Agree	Agree	Neutral	Strongly agree	Neutral	Neutral	36	12	34	37	24	37	31	35	70	40	65	63	70	68	2	1	3	4	3	3
R_1l5A1noV5TQzM9I	Yes, Female		White	No	You: 540 Other: 280	You: 560 Other: 300	You: 580 Other: 320	You: 560 Other: 300	You: 560 Other: 300	You: 570 Other: 300	You: 560 Other: 300	You: 550 Other: 300	You: 540 Other: 300	Disagree	Strongly agree	Agree	Agree	Disagree	Agree	Neutral	Neutral	65	30	50	72	86	39	67	40	50	30	65	67	66	63	3	2	2	5	5	5
R_2WBiSqAt6b64lXf	Yes, Female		White	No	You: 480 Other: 80	You: 500 Other: 100	You: 520 Other: 120	You: 500 Other: 100	You: 490 Other: 90	You: 500 Other: 100	You: 510 Other: 110	You: 500 Other: 100	You: 480 Other: 100	Disagree	Agree	Neutral	Agree	Disagree	Agree	Agree	Agree	42	36	40	58	58	59	55	44	55	56	56	58	60	60	2	2	4	4	3	3
R_2tflPq7xXlNJRGk	Yes, Male		Black or African-American	No	You: 480 Other: 80	You: 500 Other: 500	You: 520 Other: 520	You: 500 Other: 100	You: 560 Other: 300	You: 500 Other: 100	You: 510 Other: 510	You: 550 Other: 300	You: 480 Other: 100
R_3h6MHNRkWchhlnU	Yes, Male		Black or African-American	No	You: 480 Other: 480	You: 500 Other: 500	You: 520 Other: 520	You: 490 Other: 490	You: 500 Other: 500	You: 500 Other: 500	You: 510 Other: 510	You: 500 Other: 500	You: 490 Other: 490	Agree	Strongly agree	Neutral	Agree	Agree	Agree	Agree	Neutral	50	25	25	75	25	75	75	25	50	50	25	50	50	75	4	4	5	3	2	1
R_3iQhf986q1evIUK	Yes, Male		Some Other	No	You: 480 Other: 480	You: 500 Other: 500	You: 520 Other: 520
R_SV339OicTiMRzsB	Yes, Female		Asian	No	You: 480 Other: 480	You: 500 Other: 500	You: 520 Other: 520	You: 490 Other: 490	You: 500 Other: 500	You: 500 Other: 500	You: 510 Other: 510	You: 500 Other: 500	You: 490 Other: 490	Disagree	Agree	Disagree	Agree	Neutral	Agree	Agree	Neutral	35	40	30	60	40	65	65	34	37	60	34	60	60	60	2	2	4	4	4	4
R_RgXblajQs6rGI8h			Hawaiian Northern & Pacific Islander	No	You: 480 Other: 480	You: 500 Other: 500	You: 520 Other: 520	You: 490 Other: 490	You: 500 Other: 500	You: 500 Other: 500	You: 510 Other: 510	You: 500 Other: 500	You: 490 Other: 490	Disagree	Agree	Neutral	Strongly agree	Neutral	Agree	Neutral	Neutral	35	35	60	75	90	60	75	55	50	60	50	55	60	60	3	3	3	3	3	3
R_3qx0g7iBPj98pX2	Yes, Female		Some Other	Yes	You: 480 Other: 480	You: 500 Other: 500	You: 520 Other: 520	You: 490 Other: 490	You: 500 Other: 500	You: 500 Other: 500	You: 510 Other: 110	You: 500 Other: 500	You: 490 Other: 490	Strongly disagree	Strongly agree	Neutral	Strongly agree	Strongly disagree	Strongly agree	Strongly agree	Strongly agree	25	25	25	50	40	100	16	28	50	5	75	0	30	100	1	1	4	5	4	4
R_2tJ1Ni7goREM7s7	Yes, Female		Some Other	Yes	You: 540 Other: 280	You: 560 Other: 300	You: 580 Other: 320	You: 560 Other: 300	You: 560 Other: 300	You: 570 Other: 300	You: 560 Other: 300	You: 550 Other: 300	You: 540 Other: 300	Disagree	Agree	Disagree	Agree	Disagree	Agree	Agree	Agree	51	46	30	57	54	53	60	40	49	55	52	51	57	53	3	3	3	3	4	4
R_2P4Jq2ySo1rS14c	Yes, Female		Some Other	Yes	You: 480 Other: 480	You: 500 Other: 500	You: 520 Other: 520	You: 490 Other: 490	You: 500 Other: 500	You: 500 Other: 500	You: 510 Other: 510	You: 500 Other: 500	You: 490 Other: 490	Strongly disagree	Strongly agree	Disagree	Strongly agree	Strongly disagree	Agree	Agree	Strongly agree	50	50	25	40	75	50	80	20	75	75	60	70	75	90	1	1	5	4	4	4
R_1IBeOnq0dPdwKib	Yes, Female		White	Yes	You: 480 Other: 480	You: 560 Other: 300	You: 580 Other: 320	You: 490 Other: 490	You: 500 Other: 500	You: 570 Other: 300	You: 510 Other: 510	You: 500 Other: 500	You: 540 Other: 300	Disagree	Strongly agree	Strongly disagree	Strongly agree	Strongly disagree	Strongly agree	Agree	Strongly agree
R_6mTWHOkS24tmzaV
R_1gvHouPEzkGMVTo	Yes, Female		Some Other	Yes	You: 480 Other: 480	You: 560 Other: 300	You: 520 Other: 520	You: 560 Other: 300	You: 560 Other: 300	You: 500 Other: 500	You: 560 Other: 300	You: 500 Other: 500	You: 540 Other: 300	Strongly disagree	Strongly agree	Strongly disagree	Strongly agree	Strongly disagree	Strongly agree	Neutral	Agree	95	25	90	50	98	60	80	40	80	60	100	50	55	30	1	3	3	4	4	4
R_2PbNm7mT087IJZN	Yes, Female		Asian	Yes	You: 540 Other: 280	You: 560 Other: 300	You: 580 Other: 320	You: 560 Other: 300	You: 560 Other: 300	You: 570 Other: 300	You: 560 Other: 300	You: 550 Other: 300	You: 540 Other: 300	Disagree	Agree	Disagree	Agree	Disagree	Agree	Neutral	Neutral	70	68	77	76	54	58	62	83	82	59	74	40	34	34	3	3	4	5	3	3
R_2uUmr56yoitjLru	Yes, Male		Black or African-American	No	You: 480 Other: 480	You: 560 Other: 300	You: 520 Other: 520	You: 560 Other: 300	You: 500 Other: 500	You: 500 Other: 100	You: 560 Other: 300	You: 550 Other: 300	You: 490 Other: 490	Disagree	Agree	Neutral	Agree	Neutral	Agree	Agree	Neutral	31	13	51	16	77	39	92	55	60	77	73	96	67	92	3	5	2	3	2	4
R_0Dv0ze3v3ssjRn3	Yes, Female		Asian	No	You: 480 Other: 480	You: 500 Other: 500	You: 520 Other: 520	You: 490 Other: 490	You: 500 Other: 500	You: 500 Other: 500	You: 510 Other: 510	You: 500 Other: 500	You: 490 Other: 490	Disagree	Agree	Neutral	Agree	Neutral	Agree	Neutral	Agree	40	40	40	40	60	60	40	40	45	60	35	35	35	45	2	2	4	5	4	4
R_e2Ii7wHt7JFk1YR	Yes, Male		White	No	You: 540 Other: 280	You: 560 Other: 300	You: 520 Other: 520	You: 490 Other: 490	You: 500 Other: 500	You: 570 Other: 300	You: 510 Other: 510	You: 500 Other: 500	You: 490 Other: 490	Agree	Strongly agree	Agree	Agree	Disagree	Agree	Agree	Agree	25	40	75	80	15	60	60	30	70	90	80	60
R_vOeQJDwuC28aivn	Yes, Female		Some Other	Yes	You: 480 Other: 480	You: 500 Other: 500	You: 520 Other: 520	You: 490 Other: 490	You: 500 Other: 500	You: 500 Other: 500	You: 510 Other: 510	You: 500 Other: 500	You: 490 Other: 490	Disagree	Agree	Neutral	Strongly agree	Disagree	Neutral	Agree	Strongly agree	65	46	80	44	91	61	22	74	55	29	84	31	50	76	1	1	4	3	4	4
R_PH8pzR03nHIYe1r	Yes, Male		Asian	No	You: 540 Other: 280	You: 560 Other: 300	You: 580 Other: 320	You: 560 Other: 300	You: 560 Other: 300	You: 570 Other: 300	You: 560 Other: 300	You: 550 Other: 300	You: 540 Other: 300	Neutral	Neutral	Neutral	Neutral	Neutral	Neutral	Neutral	Neutral	54	44	51	47	68	50	51	50	49	50	50	50	50	46	3	3	3	3	3	3
R_2SJ53GoyGJAcunm	Yes, Female		Asian	No	You: 540 Other: 280	You: 560 Other: 300	You: 580 Other: 320	You: 500 Other: 100	You: 490 Other: 90	You: 570 Other: 300	You: 510 Other: 110	You: 500 Other: 100	You: 480 Other: 100	Agree	Agree	Agree	Agree	Neutral	Agree	Neutral	Neutral	31	5	39	88	88	73	66	25	70	82	77	86	70	80	1	3	3	4	3	3
R_PzUxcybUgkIqwut
R_2wzBXrqJVUpQnPv	Yes, Male		White	No	You: 480 Other: 480	You: 500 Other: 500	You: 520 Other: 520	You: 490 Other: 490	You: 500 Other: 500	You: 500 Other: 500	You: 510 Other: 510	You: 500 Other: 500	You: 490 Other: 490	Neutral	Agree	Agree	Disagree	Agree	Agree	Neutral	Neutral	50	84	54	20	23	100	37	100	99	37	6	35	86	92	3	3	3	2	3	4
R_3R2vgmWMBMVtr7Z	Yes, Male		Some Other	No
R_XiIX5JvFabYNLMt	No, I do not identify as male or female	Nonbinary	Black or African-American	No	You: 480 Other: 480	You: 500 Other: 500	You: 520 Other: 520	You: 490 Other: 490	You: 500 Other: 500	You: 500 Other: 500	You: 510 Other: 510	You: 500 Other: 500	You: 490 Other: 490	Strongly disagree	Strongly agree	Agree	Strongly agree	Strongly disagree	Agree	Agree	Strongly agree	65	0	38	100	73	100	83	24	40	23	80	34	76	92	2	1	5	4	2	1
R_1hGSnhawH8veQ1m	Yes, Female		White	No	You: 540 Other: 280	You: 560 Other: 300	You: 580 Other: 320	You: 560 Other: 300	You: 560 Other: 300	You: 570 Other: 300	You: 560 Other: 300	You: 500 Other: 500	You: 540 Other: 300	Agree	Strongly agree	Agree	Strongly agree	Disagree	Agree	Agree	Agree	65	57	73	41	85	27	60	30	31	39	58	60	58	77	3	1	4	3	3	4
R_23VnLFIP2ZBLU3D	Yes, Female		White	No	You: 480 Other: 480	You: 560 Other: 300	You: 580 Other: 320	You: 560 Other: 300	You: 560 Other: 300	You: 570 Other: 300	You: 560 Other: 300	You: 550 Other: 300	You: 540 Other: 300	Disagree	Strongly agree	Neutral	Agree	Strongly disagree	Agree	Strongly agree	Strongly agree	77	17	67	29	72	51	27	57	99	36	100	34	51	27	4	2	3	5	5	5
R_2qfyAzwUxLZXsnz	Yes, Female		White	No	You: 540 Other: 280	You: 560 Other: 300	You: 580 Other: 320	You: 560 Other: 300	You: 560 Other: 300	You: 570 Other: 300	You: 560 Other: 300	You: 550 Other: 300	You: 540 Other: 300	Disagree	Strongly agree	Disagree	Strongly agree	Strongly disagree	Strongly agree	Agree	Agree	42	22	75	61	88	11	23	77	67	26	81	35	24	39	1	1	4	5	3	4
R_ufRPPqJNd76cMjn	Yes, Female		Hawaiian Northern & Pacific Islander	No
R_3nH3U6yBRUglaGh	Yes, Female		American Indian or Alaskan Native	No	You: 480 Other: 480	You: 500 Other: 500	You: 520 Other: 520	You: 490 Other: 490	You: 500 Other: 500	You: 500 Other: 500	You: 560 Other: 300	You: 550 Other: 300	You: 490 Other: 490	Neutral	Agree	Disagree	Agree	Agree	Neutral	Neutral	Neutral	80	59	70	66	80	85	75	50	70	80	70	75	75	85	2	3	4	4	3	4
R_1rCESFZCgNDIzfk	No, I do not identify as male or female	non-binary	White	No	You: 480 Other: 480	You: 500 Other: 500	You: 520 Other: 520	You: 490 Other: 490	You: 500 Other: 500	You: 500 Other: 500	You: 510 Other: 510	You: 500 Other: 500	You: 490 Other: 490	Agree	Agree	Agree	Agree	Neutral	Neutral	Neutral	Agree	25	70	50	35	80	0	30	65	60	80	60	30	50	30	3	2	3	5	5	4
R_bPhNJRwr5WZXU89	Yes, Female		White	No
R_WpnlQ7T5iw2Y0JH	Yes, Female		White		You: 480 Other: 480	You: 500 Other: 500	You: 520 Other: 520	You: 490 Other: 490	You: 500 Other: 500	You: 500 Other: 500	You: 510 Other: 510	You: 500 Other: 500	You: 490 Other: 490	Disagree	Strongly agree	Disagree	Strongly agree	Strongly disagree	Agree	Agree	Strongly agree	82	57	82	35	82	45	34	75	70	21	76	24	35	44	1	1	4	5	5	5
R_bmgBlrommDz42zv
R_byJB1tkTgIVCgrD	Yes, Female		Asian	No	You: 480 Other: 480	You: 500 Other: 500	You: 520 Other: 520	You: 490 Other: 490	You: 500 Other: 500	You: 500 Other: 500	You: 510 Other: 510	You: 500 Other: 500	You: 490 Other: 490	Agree	Agree	Agree	Agree	Agree	Agree	Strongly disagree	Strongly disagree	50	0	62	72	81	50	84	43	25	50	75	69	50	77	2	2	2	4	4	3
R_2rUG3kiBZSyo788	Yes, Female		Asian	No	You: 540 Other: 280	You: 500 Other: 100	You: 580 Other: 320	You: 500 Other: 100	You: 490 Other: 90	You: 500 Other: 100	You: 510 Other: 110	You: 550 Other: 300	You: 480 Other: 100	Disagree	Strongly agree	Neutral	Strongly agree	Strongly disagree	Strongly agree	Strongly agree	Strongly agree	62	25	36	63	76	56	75	35	60	75	81	70	75	89	1	1	5	4	5	5
R_1oGt7QNAvkJjl3E	Yes, Female		Some Other	Yes	You: 480 Other: 480	You: 500 Other: 500	You: 520 Other: 520	You: 490 Other: 490	You: 500 Other: 500	You: 500 Other: 500	You: 510 Other: 510	You: 500 Other: 500	You: 490 Other: 490	Neutral	Strongly agree	Agree	Strongly agree	Neutral	Agree	Disagree	Agree	52	49	53	38	61	60	58	46	63	56	45	72	59	60	4	2	2	5	5	5
R_3oZ0KtQJFOSrBOf	Yes, Male		Black or African-American		You: 540 Other: 280	You: 560 Other: 300	You: 580 Other: 320	You: 490 Other: 490	You: 560 Other: 300	You: 570 Other: 300	You: 560 Other: 300	You: 550 Other: 300	You: 540 Other: 300	Neutral	Agree	Neutral	Agree	Agree	Agree	Disagree	Agree	95	15	50	90	60	10	88	25	80	80	96	40	51	93	3	2	1	4	3	2
R_2w628TsGhrt9zmk	Yes, Male		Asian	No	You: 540 Other: 280	You: 500 Other: 500	You: 580 Other: 320	You: 560 Other: 300	You: 560 Other: 300	You: 500 Other: 500	You: 510 Other: 510	You: 550 Other: 300	You: 540 Other: 300	Neutral	Agree	Disagree	Agree	Disagree	Strongly agree	Disagree	Agree	57	11	60	100	83	39	73	57	47	44	87	37	61	39	2	2	4	4	4	2
R_3Ja9WGVepmWrWup
R_1oo2rV4YmTcn3rd
R_10MeVsv2Kz39REi	Yes, Female		White		You: 540 Other: 280	You: 560 Other: 300	You: 580 Other: 320	You: 560 Other: 300	You: 500 Other: 500	You: 500 Other: 500	You: 510 Other: 510	You: 500 Other: 500	You: 490 Other: 490	Strongly disagree	Strongly agree	Neutral	Strongly agree	Strongly disagree	Neutral	Agree	Agree	60	0	38	22	81	0	74	26	70	0	80	51	66	20	1	1	4	4	5	4
R_1jpP2FXNJiIY5ig
R_ePrw7oNnLxQo1nr	Yes, Female		White	No	You: 540 Other: 280	You: 500 Other: 500	You: 520 Other: 520	You: 490 Other: 490	You: 500 Other: 500	You: 500 Other: 500	You: 510 Other: 510	You: 500 Other: 500	You: 490 Other: 490	Disagree	Agree	Strongly disagree	Agree	Disagree	Agree	Agree	Agree	83	45	76	59	86	58	43	45	56	40	61	46	53	46	2	2	4	4	3	3
R_1JKfXdmdCUikxwI
R_3ReI0mrT2MMDa5J	Yes, Female		Asian	No	You: 540 Other: 280	You: 500 Other: 100	You: 580 Other: 320	You: 560 Other: 300	You: 560 Other: 300	You: 570 Other: 300	You: 560 Other: 300	You: 550 Other: 300	You: 540 Other: 300	Neutral	Strongly agree	Strongly agree	Strongly agree	Disagree	Agree	Neutral	Neutral	25	20	25	100	48	68	60	34	52	70	36	59	75	79	2	2	4	5	3	3
R_wM3iYmfyPal4zgR	Yes, Female		Black or African-American	No	You: 540 Other: 280	You: 500 Other: 500	You: 520 Other: 520	You: 490 Other: 490	You: 500 Other: 500	You: 500 Other: 500	You: 510 Other: 510	You: 500 Other: 500	You: 490 Other: 490	Disagree	Agree	Neutral	Agree	Agree	Strongly agree	Agree	Agree	40	40	60	45	35	36	65	45	65	52	65	39	65	67	4	2	4	3	4	4
R_2YXNhNk72c0WJSK	Yes, Female		White	No	You: 480 Other: 480	You: 560 Other: 300	You: 520 Other: 520	You: 560 Other: 300	You: 560 Other: 300	You: 570 Other: 300	You: 510 Other: 510	You: 550 Other: 300	You: 540 Other: 300	Strongly disagree	Strongly agree	Disagree	Strongly agree	Strongly agree	Agree	Agree	Strongly agree	63	50	41	53	61	54	57	42	56	70	80	67	66	68	4	3	5	4	5	5
R_AgMtUvmPIOovyRH	Yes, Female		Some Other	No	You: 480 Other: 480	You: 500 Other: 500	You: 580 Other: 320	You: 560 Other: 300	You: 500 Other: 500	You: 500 Other: 500	You: 560 Other: 300	You: 500 Other: 500	You: 490 Other: 490	Neutral	Strongly agree	Disagree	Strongly agree	Strongly disagree	Agree	Agree	Strongly agree	60	20	38
R_pshBFBd3iNDe3L3	Yes, Male		White	No	You: 540 Other: 280	You: 560 Other: 300	You: 580 Other: 320	You: 560 Other: 300	You: 560 Other: 300	You: 570 Other: 300	You: 560 Other: 300	You: 550 Other: 300	You: 540 Other: 300	Neutral	Strongly agree	Agree	Strongly agree	Disagree	Agree	Neutral	Strongly agree	50	25	25	65	75	10	75	30	65	30	40	66	75	40	2	2	3	4	3	3
R_2rGvDuC8zZZTvoq
R_1rDOkiEG7VZGfin	Yes, Female		Asian	No	You: 540 Other: 280	You: 560 Other: 300	You: 580 Other: 320	You: 560 Other: 300	You: 560 Other: 300	You: 570 Other: 300	You: 560 Other: 300	You: 550 Other: 300	You: 540 Other: 300	Agree	Strongly agree	Strongly agree	Strongly agree	Disagree	Neutral	Agree	Strongly agree	55	5	35	75	76	100	85	35	42	43	76	94	67	61	4	1	1	5	5	3
R_4U75rCoCPiX4ecx	No, I do not identify as male or female	Non-binary	Some Other	No	You: 480 Other: 480	You: 500 Other: 500	You: 520 Other: 520	You: 490 Other: 490	You: 500 Other: 500	You: 500 Other: 500	You: 510 Other: 510	You: 500 Other: 500	You: 540 Other: 300	Neutral	Agree	Strongly agree	Agree	Disagree	Agree	Neutral	Agree	70	50	65	60	60	45	60	50	60	40	60	40	50	60	3	2	3	3	3	4
R_2PzC7GFA8j85dPV	Yes, Male		Black or African-American	No	You: 480 Other: 480	You: 500 Other: 500	You: 520 Other: 520	You: 490 Other: 490	You: 500 Other: 500	You: 500 Other: 500	You: 510 Other: 510	You: 500 Other: 500	You: 490 Other: 490	Neutral	Agree	Neutral	Agree	Neutral	Agree	Neutral	Neutral	80	30	44	64	37	79	62	34	41	60	61	59	83	74	3	2	3	4	2	3
R_1IT13m3iqkerSPG	Yes, Female		White	No	You: 480 Other: 480	You: 500 Other: 500	You: 520 Other: 520	You: 490 Other: 490	You: 500 Other: 500	You: 500 Other: 500	You: 510 Other: 510	You: 500 Other: 500	You: 490 Other: 490	Disagree	Strongly agree	Strongly disagree	Agree	Disagree	Agree	Agree	Strongly agree	63	36	50	53	48	48	57	50	53	47	38	59	54	54	2	2	4	4	3	3
R_1FZYUxqDM1ZMUjD	Yes, Female		White	No	You: 480 Other: 480	You: 560 Other: 300	You: 520 Other: 520	You: 490 Other: 490	You: 500 Other: 500	You: 500 Other: 500	You: 510 Other: 510	You: 500 Other: 500	You: 490 Other: 490	Strongly disagree	Agree	Disagree	Strongly agree	Disagree	Agree	Agree	Strongly agree	66	56	77	50	64	57	36	51	63	37	65	25	43	40	3	2	3	4	3	4
R_6mXr8Hx7wtVQSf7	Yes, Female		Some Other	No	You: 480 Other: 480	You: 500 Other: 500	You: 520 Other: 520	You: 490 Other: 490	You: 500 Other: 500	You: 500 Other: 500	You: 510 Other: 510	You: 500 Other: 500	You: 490 Other: 490	Agree	Strongly agree	Agree	Agree	Disagree	Agree	Agree	Agree	32	15	37	85	65	76	70	41	39	80	62	89	71	73	3	3	4	2	2	2
R_1mPESVOuDCn9v4Y
R_1MSRqQxGJzIqX0s	Yes, Female		Asian	No	You: 540 Other: 280	You: 560 Other: 300	You: 580 Other: 320	You: 560 Other: 300	You: 560 Other: 300	You: 570 Other: 300	You: 560 Other: 300	You: 550 Other: 300	You: 540 Other: 300	Agree	Neutral	Agree	Neutral	Agree	Disagree	Strongly disagree	Disagree	0	0	0	100	0	0	100	0	7	100	0	100	100	30	5	4	2	2	2	2
R_pgGrwdxA7rzuYQF	Yes, Female		Some Other	Yes	You: 540 Other: 280	You: 500 Other: 500	You: 520 Other: 520	You: 560 Other: 300	You: 560 Other: 300	You: 570 Other: 300	You: 510 Other: 510	You: 500 Other: 500	You: 490 Other: 490	Disagree	Agree	Neutral	Agree	Disagree	Agree	Agree	Agree	35	50	30	50	80	61	65	35	60	65	70	65	65	66	1	2	5	4	3	3
R_1j9WeMdCVl81vnJ	Yes, Male		Asian	No	You: 480 Other: 480	You: 500 Other: 500	You: 520 Other: 520	You: 490 Other: 490	You: 500 Other: 500	You: 500 Other: 500	You: 510 Other: 510	You: 500 Other: 500	You: 490 Other: 490	Disagree	Agree	Disagree	Agree	Disagree	Agree	Agree	Agree	75	20	75	70	50	40	50	25	75	80	70	40	76	80	2	2	4	4	4	4
R_24tNaa2ZAdh1BNa	Yes, Male		Some Other	No	You: 480 Other: 480	You: 500 Other: 500	You: 520 Other: 520	You: 490 Other: 490	You: 500 Other: 500	You: 500 Other: 500	You: 510 Other: 510	You: 500 Other: 500	You: 490 Other: 490	Disagree	Strongly agree	Agree	Agree	Neutral	Neutral	Neutral	Agree	50	35	75	50	95	50	50	66	66	9	72	6	50	33	3	4	2	5	3	4
R_1DZsi9lv3VhHit4	Yes, Female		Black or African-American	No	You: 540 Other: 280	You: 560 Other: 300	You: 580 Other: 320	You: 560 Other: 300	You: 500 Other: 500	You: 570 Other: 300	You: 560 Other: 300	You: 550 Other: 300	You: 540 Other: 300	Disagree	Strongly agree	Strongly disagree	Agree	Disagree	Agree	Neutral	Neutral	59	23	71	50	85	57	59	43	93	55	86	43	51	40	2	2	3	4	3	4
R_1g1quDgwLWdaW9c
R_3siiJ7XulxzuDVT	Yes, Female		White	Yes	You: 540 Other: 280	You: 560 Other: 300	You: 580 Other: 320	You: 560 Other: 300	You: 560 Other: 300	You: 570 Other: 300	You: 560 Other: 300	You: 550 Other: 300	You: 540 Other: 300	Disagree	Strongly agree	Disagree	Strongly agree	Disagree	Agree	Agree	Agree	59	39	36	63	79	73	61	43	44	51	65	51	68	40	5	2	4	4	4	4
R_3jd5eeN0g3kYjt1	Yes, Female		Some Other	No	You: 540 Other: 280	You: 560 Other: 300	You: 580 Other: 320	You: 560 Other: 300	You: 560 Other: 300	You: 570 Other: 300	You: 560 Other: 300	You: 550 Other: 300	You: 540 Other: 300	Disagree	Agree	Agree	Agree	Disagree	Agree	Neutral	Agree	77	33	91	77	92	63	15	51	78	59	90	31	10	85
R_3lELqEVb0aMwELO	Yes, Female		White	No	You: 540 Other: 280	You: 560 Other: 300	You: 580 Other: 320	You: 560 Other: 300	You: 560 Other: 300	You: 570 Other: 300	You: 560 Other: 300	You: 550 Other: 300	You: 540 Other: 300	Neutral	Agree	Disagree	Agree	Neutral	Disagree	Agree	Agree	56	0	60	38	13	66	60	63	78	38	72	40	60	60	2	1	4	4	3	2
R_3MzF8V4WHNjs9hG
R_3PcqhzoIA0yZeDL	Yes, Female		Some Other	No	You: 480 Other: 480	You: 500 Other: 500	You: 520 Other: 120	You: 490 Other: 490	You: 500 Other: 500	You: 500 Other: 500	You: 510 Other: 510	You: 500 Other: 500	You: 490 Other: 490	Disagree	Strongly agree	Neutral	Agree	Disagree	Agree	Agree	Agree	50	49	69	59	80	37	23	65	79	42	88	25	32	45	3	4	4	4	2	2
R_3I4B0OXn0Wb4iqW	Yes, Female		White	Yes	You: 480 Other: 480	You: 500 Other: 500	You: 580 Other: 320	You: 490 Other: 490	You: 500 Other: 500	You: 500 Other: 500	You: 510 Other: 510	You: 550 Other: 300	You: 490 Other: 490	Neutral	Strongly agree	Disagree	Agree	Neutral	Strongly agree	Agree	Agree	72	20	51	96	77	63	86	35	77	82	71	88	54	71	1	1	4	3	2	3
R_31asTIhjAlz7fMb	No, I do not identify as male or female	Non-bin
R_3g5xvK7CXZHhCRp	Yes, Male		Asian	No	You: 540 Other: 280	You: 500 Other: 100	You: 580 Other: 320	You: 560 Other: 300	You: 560 Other: 300	You: 570 Other: 300	You: 560 Other: 300	You: 550 Other: 300	You: 540 Other: 300	Neutral	Agree	Agree	Agree	Neutral	Neutral	Neutral	Neutral	50	50	40	50	60	40	50	40	50	70	65	35	55	60	2	2	3	4	3	3
R_9zeu1CMUTtyW1k5	Yes, Male		Black or African-American		You: 540 Other: 280	You: 560 Other: 300	You: 580 Other: 320	You: 560 Other: 300	You: 560 Other: 300	You: 570 Other: 300	You: 560 Other: 300	You: 550 Other: 300	You: 540 Other: 300	Neutral	Agree	Disagree	Agree	Neutral	Agree	Neutral	Agree	99	50	25	75	85	50	65	20	70	80	90	26	50	95
R_1LhT8UrHGFwTSVa	Yes, Female		Asian	No	You: 480 Other: 480	You: 500 Other: 500	You: 520 Other: 520	You: 490 Other: 490	You: 500 Other: 500	You: 500 Other: 500	You: 510 Other: 510	You: 500 Other: 500	You: 490 Other: 490	Strongly disagree	Neutral	Agree	Agree	Neutral	Agree	Neutral	Neutral	33	35	44	38	63	59
R_3rYFnAibGCTgXFN	Yes, Female		Some Other	No
R_22GiNy05hiVp9kV	Yes, Female		White	Yes	You: 540 Other: 280	You: 560 Other: 300	You: 580 Other: 320	You: 560 Other: 300	You: 560 Other: 300	You: 570 Other: 300	You: 560 Other: 300	You: 550 Other: 300	You: 540 Other: 300	Disagree	Agree	Disagree	Strongly agree	Disagree	Agree	Disagree	Neutral	100	60	100	100	100	23	0	76	90	12	85	15	10	76	5	1	3	4	5	4
R_33yu4nbBojSdaQg	Yes, Female		White	Yes	You: 480 Other: 480	You: 500 Other: 500	You: 520 Other: 520	You: 490 Other: 490	You: 500 Other: 500	You: 500 Other: 500	You: 510 Other: 510	You: 500 Other: 500	You: 490 Other: 490	Agree	Strongly agree	Strongly agree	Strongly agree	Disagree	Neutral	Strongly agree	Strongly agree	85	7	33	92	88	17	16	58	93	6	90	13	16	5	2	1	3	5	2	4
R_TtiadNsPKKSTwc1	Yes, Male		White	No	You: 540 Other: 280	You: 560 Other: 300	You: 520 Other: 520	You: 560 Other: 300	You: 500 Other: 500	You: 500 Other: 500	You: 510 Other: 510	You: 500 Other: 500	You: 490 Other: 490	Strongly disagree	Strongly agree	Strongly agree	Strongly agree	Disagree	Strongly agree	Strongly agree	Agree	53	31	57	65	100	0	0	100	100	100	100	0	0	100	1	1	5	4	1	5
R_bCvOohR2GdmVf6F	Yes, Male		Asian	No	You: 480 Other: 80	You: 560 Other: 300	You: 520 Other: 120	You: 500 Other: 100	You: 490 Other: 90	You: 500 Other: 100	You: 510 Other: 110	You: 500 Other: 100	You: 480 Other: 100	Agree	Agree	Disagree	Agree	Neutral	Neutral	Agree	Agree	75	50	50	45	75	50	54	40	75	25	40	45	48	51	3	3	3	4	4	4
R_2cbGXDhBTg7pouX			Asian	No	You: 480 Other: 480	You: 500 Other: 500	You: 520 Other: 520	You: 560 Other: 300	You: 500 Other: 500	You: 500 Other: 500	You: 510 Other: 510	You: 500 Other: 500	You: 490 Other: 490
R_2aK6bEn7IrXjp2i	Yes, Female		Asian	No	You: 480 Other: 480	You: 500 Other: 500	You: 520 Other: 520	You: 560 Other: 300	You: 500 Other: 500	You: 500 Other: 500	You: 510 Other: 510	You: 500 Other: 500	You: 540 Other: 300	Neutral	Agree	Agree	Agree	Disagree	Neutral	Agree	Agree	58	36	30	69	61	73	57	49	59	39	59	61	67	71	2	2	3	4	3	3
R_3lDPgbKLDJ2WZve	Yes, Female		White	No	You: 540 Other: 280	You: 500 Other: 500	You: 520 Other: 520	You: 490 Other: 490	You: 500 Other: 500	You: 500 Other: 500	You: 510 Other: 510	You: 500 Other: 500	You: 490 Other: 490	Strongly agree	Agree	Disagree	Agree	Agree	Agree	Agree	Neutral	65	65	23	27	0	0	88	12	66	98	30	100	65	79	5	2	2	5	2	4
R_8uMGR6uJypbKbRL	Yes, Female		Asian	No	You: 540 Other: 280	You: 560 Other: 300	You: 580 Other: 320	You: 560 Other: 300	You: 560 Other: 300	You: 570 Other: 300	You: 560 Other: 300	You: 550 Other: 300	You: 540 Other: 300	Neutral	Agree	Neutral	Agree	Neutral	Neutral	Neutral	Neutral	51	51	51	50	78	64	67	65	62	40	80	51	49	100	3	3	3	5	5	5
R_W0rUD8YB5QDX6yB	Yes, Female		Some Other	Yes	You: 480 Other: 480	You: 500 Other: 500	You: 520 Other: 520	You: 490 Other: 490	You: 500 Other: 500	You: 500 Other: 500	You: 510 Other: 510	You: 500 Other: 500	You: 490 Other: 490	Neutral	Agree	Disagree	Strongly agree	Disagree	Agree	Agree	Agree	30	23	28	86	64	61	76	37	38	70	27	42	74	76	4	1	5	4	2	3
R_339oMBK2oQyh6cX	Yes, Female		Asian	No	You: 540 Other: 280	You: 560 Other: 300	You: 580 Other: 320	You: 560 Other: 300	You: 560 Other: 300	You: 570 Other: 300	You: 560 Other: 300	You: 550 Other: 300	You: 540 Other: 300	Strongly agree	Neutral	Agree	Neutral	Strongly agree	Disagree	Disagree	Disagree	0	5	0	95	0	100	100	0	10	100	0	100	95	50	5	4	1	3	2	1
R_4O2WcXlHNqYZabD	Yes, Female		Asian	No	You: 540 Other: 280	You: 560 Other: 300	You: 580 Other: 320	You: 560 Other: 300	You: 560 Other: 300	You: 570 Other: 300	You: 560 Other: 300	You: 550 Other: 300	You: 540 Other: 300	Strongly agree	Neutral	Agree	Neutral	Strongly agree	Strongly disagree	Strongly disagree	Disagree	0	3	0	91	0	100	100	3	8	100	0	100	95	50	5	1	1	3	2	2
R_DIXzSEps6mLC5fr	Yes, Female		Asian	No	You: 540 Other: 280	You: 560 Other: 300	You: 580 Other: 320	You: 560 Other: 300	You: 560 Other: 300	You: 570 Other: 300	You: 560 Other: 300	You: 550 Other: 300	You: 540 Other: 300	Strongly agree	Neutral	Agree	Neutral	Strongly agree	Strongly disagree	Disagree	Disagree	0	2	0	97	0	100	100	4	6	100	0	100	98	50	5	4	1	3	2	2
R_82LuLr33dyeOyFb	Yes, Female		Some Other	No	You: 540 Other: 280	You: 560 Other: 300	You: 520 Other: 520	You: 490 Other: 490	You: 500 Other: 500	You: 570 Other: 300	You: 560 Other: 300	You: 500 Other: 500	You: 540 Other: 300	Neutral	Strongly agree	Disagree	Strongly agree	Neutral	Agree	Agree	Strongly agree	37	0	70	40	73	29	35	35	88	5	75	30	83	100	1	2	4	5	4	4
R_x3DKiLU4bGXcNvX	Yes, Female		Asian	No	You: 480 Other: 480	You: 500 Other: 500	You: 520 Other: 520	You: 490 Other: 490	You: 500 Other: 500	You: 500 Other: 500	You: 510 Other: 510	You: 500 Other: 500	You: 490 Other: 490	Disagree	Strongly agree	Agree	Strongly agree	Disagree	Agree	Neutral	Agree	50	50	75	75	85	10	25	40	100	60	65	10	65	75	2	2	3	4	4	4
R_zU72F2q416G3v3j	Yes, Female		White	No	You: 480 Other: 480	You: 500 Other: 500	You: 520 Other: 520	You: 490 Other: 490	You: 500 Other: 500	You: 500 Other: 500	You: 510 Other: 510	You: 500 Other: 500	You: 490 Other: 490	Strongly disagree	Strongly agree	Strongly disagree	Strongly agree	Neutral	Strongly agree	Neutral	Agree	76	23	76	58	88	29	37	51	51	61	68	61	34	66	2	2	4	5	4	4
R_tKfh2rIh92X4z2V	Yes, Female		White	No	You: 540 Other: 280	You: 500 Other: 100	You: 520 Other: 120	You: 500 Other: 100	You: 490 Other: 90	You: 500 Other: 100	You: 510 Other: 110	You: 500 Other: 100	You: 480 Other: 100	Disagree	Agree	Agree	Strongly agree	Strongly disagree	Agree	Strongly agree	Agree	26	15	32	68	43	84	75	21	65	80	19	90	86	98	2	2	3	4	4	4
R_XLcVSs3YRMfhXvX	Yes, Female		White	No	You: 540 Other: 280	You: 560 Other: 300	You: 580 Other: 320	You: 560 Other: 300	You: 560 Other: 300	You: 570 Other: 300	You: 560 Other: 300	You: 550 Other: 300	You: 540 Other: 300	Disagree	Strongly agree	Agree	Strongly agree	Strongly disagree	Disagree	Agree	Agree	60	0	35	25	90	20	70	25	50	0	90	25	30	25	2	2	4	5	4	4
R_24obAZEaI3BjeTz	Yes, Female		Asian	No	You: 480 Other: 480	You: 500 Other: 500	You: 520 Other: 520	You: 490 Other: 490	You: 500 Other: 500	You: 500 Other: 500	You: 510 Other: 510	You: 500 Other: 500	You: 490 Other: 490	Disagree	Strongly agree	Disagree	Strongly agree	Strongly disagree	Agree	Agree	Strongly agree	68	63	73	68	70	49	33	67	69	62	73	71	64	73	1	1	5	5	5	5
R_yL6wcowtX9P2jMB	Yes, Female		White	No	You: 480 Other: 80	You: 500 Other: 100	You: 520 Other: 120	You: 500 Other: 100	You: 490 Other: 90	You: 500 Other: 100	You: 510 Other: 110	You: 500 Other: 100	You: 480 Other: 100	Disagree	Strongly agree	Strongly disagree	Strongly agree	Neutral	Agree	Agree	Agree	25	0	20	25	90	100	67	30	50	27	50	66	42	96	1	1	5	4	4	5
R_2TvHpyPAKUFfPtn	Yes, Female		Black or African-American	No	You: 540 Other: 280	You: 560 Other: 300	You: 580 Other: 320	You: 560 Other: 300	You: 560 Other: 300	You: 570 Other: 300	You: 560 Other: 300	You: 550 Other: 300	You: 540 Other: 300	Disagree	Strongly agree	Strongly disagree	Strongly agree	Disagree	Agree	Strongly agree	Strongly agree	45	10	40	54	40	76	80	45	41	57	46	75	65	76	3	2	2	4	3	4
R_PLk0Y9IXnuciHJf	Yes, Female		White	No	You: 540 Other: 280	You: 560 Other: 300	You: 580 Other: 320	You: 560 Other: 300	You: 560 Other: 300	You: 570 Other: 300	You: 560 Other: 300	You: 550 Other: 300	You: 540 Other: 300	Neutral	Strongly agree	Disagree	Agree	Disagree	Strongly agree	Neutral	Agree	40	40	40	60	40	60	51	51	75	55	40	40	55	75	4	3	4	4	4	4
R_2zc1JsblggbYKFM	Yes, Female		Asian	No	You: 540 Other: 280	You: 560 Other: 300	You: 580 Other: 320	You: 560 Other: 300	You: 560 Other: 300	You: 570 Other: 300	You: 560 Other: 300	You: 550 Other: 300	You: 540 Other: 300	Agree	Agree	Agree	Agree	Disagree	Agree	Neutral	Neutral	35	40	21	37	37	32	72	39	58	45	67	73	60	62	3	2	4	4	4	3
R_2SxknICHYajLLAl	Yes, Male		Black or African-American	No	You: 480 Other: 480	You: 500 Other: 500	You: 520 Other: 520	You: 490 Other: 490	You: 500 Other: 500	You: 500 Other: 500	You: 510 Other: 510	You: 500 Other: 500	You: 490 Other: 490	Disagree	Agree	Agree	Strongly agree	Neutral	Strongly agree	Neutral	Neutral	52	11	66	75	65	82	29	44	60	25	71	40	73	61	4	2	5	5	3	4
R_12rJIRu3Vn7q8lC	Yes, Female		White	No	You: 480 Other: 80	You: 500 Other: 500	You: 520 Other: 520	You: 560 Other: 300	You: 560 Other: 300	You: 570 Other: 300	You: 560 Other: 300	You: 550 Other: 300	You: 490 Other: 490	Disagree	Agree	Disagree	Agree	Disagree	Agree	Agree	Agree	56	33	56	59	30	65	72	59	77	63	64	44	77	70	3	1	4	4	3	3
R_eeuukhqRp2w2Ktz	Yes, Female		Asian	No	You: 540 Other: 280	You: 560 Other: 300	You: 580 Other: 320	You: 560 Other: 300	You: 560 Other: 300	You: 570 Other: 300	You: 560 Other: 300	You: 500 Other: 500	You: 490 Other: 490	Neutral	Agree	Neutral	Agree	Disagree	Agree	Neutral	Agree	27	25	29	36	38	29	26	28	34	33	34	14	36	47	2	2	4	3	3	3
R_xmxeJWCd1iSUwUx	Yes, Female		Asian	No	You: 480 Other: 480	You: 500 Other: 500	You: 520 Other: 520	You: 490 Other: 490	You: 500 Other: 500	You: 500 Other: 500	You: 510 Other: 510	You: 500 Other: 500	You: 490 Other: 490	Disagree	Agree	Neutral	Strongly agree	Disagree	Agree	Agree	Agree	65	50	40	40	75	40	60	49	95	75	70	36	52	80	2	1	4	5	5	4
R_2P67Lqg3SuuVgVr	Yes, Male		Asian	No	You: 540 Other: 280	You: 560 Other: 300	You: 580 Other: 320	You: 560 Other: 300	You: 500 Other: 500	You: 570 Other: 300	You: 560 Other: 300	You: 550 Other: 300	You: 540 Other: 300	Agree	Strongly agree	Strongly agree	Agree	Disagree	Strongly agree	Disagree	Agree	51	17	12	62	73	28	66	55	41	60	67	26	57	29	4	5	2	5	4	4
R_1IyMsvmlSCSzj6N	Yes, Female		White	No	You: 480 Other: 480	You: 500 Other: 500	You: 520 Other: 520	You: 490 Other: 490	You: 500 Other: 500	You: 500 Other: 500	You: 510 Other: 510	You: 500 Other: 500	You: 490 Other: 490	Disagree	Agree	Neutral	Strongly agree	Disagree	Agree	Agree	Agree	67	47	57	40	76	71	75	43	75	35	72	36	63	36	1	1	4	4	4	4
R_1Nmrt6JzdBu8JW1	Yes, Female		White	No	You: 480 Other: 480	You: 500 Other: 500	You: 520 Other: 520	You: 490 Other: 490	You: 500 Other: 500	You: 500 Other: 500	You: 510 Other: 510	You: 500 Other: 500	You: 490 Other: 490	Neutral	Agree	Strongly disagree	Strongly agree	Disagree	Neutral	Agree	Neutral	70	25	50	75	55	70	85	40	49	33	75	44	50	35	3	1	4	4	4	3
R_3OibPYpvbhB9NfZ	Yes, Male		White	No	You: 540 Other: 280	You: 560 Other: 300	You: 580 Other: 320	You: 560 Other: 300	You: 560 Other: 300	You: 570 Other: 300	You: 560 Other: 300	You: 550 Other: 300	You: 540 Other: 300	Disagree	Strongly agree	Disagree	Strongly agree	Disagree	Agree	Agree	Agree	50	2	39	65	90	67	25	25	80	42	72	27	59	39	3	2	3	4	4	4
R_R3rztU8vojNaFAl	Yes, Male		White	No	You: 540 Other: 280	You: 500 Other: 500	You: 580 Other: 320	You: 560 Other: 300	You: 560 Other: 300	You: 570 Other: 300	You: 510 Other: 510	You: 550 Other: 300	You: 540 Other: 300	Disagree	Strongly agree	Neutral	Strongly agree	Neutral	Strongly agree	Neutral	Neutral	85	35	85	60	95	10	15	70	70	10	90	20	25	55	2	2	2	4	4	4
R_31M1OdRBbdZz8tZ	Yes, Female		Black or African-American	No	You: 540 Other: 280	You: 560 Other: 300	You: 580 Other: 320	You: 560 Other: 300	You: 560 Other: 300	You: 570 Other: 300	You: 560 Other: 300	You: 550 Other: 300	You: 490 Other: 490	Neutral	Neutral	Neutral	Agree	Agree	Disagree	Disagree	Neutral	51	41	51	66	87	51	59	42	51	74	47	52	56	74	4	2	3	4	2	2
R_3j6GCH4Jpe9QQI0	Yes, Female		Asian	No	You: 480 Other: 480	You: 500 Other: 500	You: 520 Other: 520	You: 490 Other: 490	You: 500 Other: 500	You: 500 Other: 500	You: 510 Other: 510	You: 500 Other: 500	You: 490 Other: 490	Disagree	Neutral	Agree	Agree	Disagree	Neutral	Agree	Agree	61	37	51	77	39	57	53	47	35	45	57	52	55	42	4	3	3	4	4	4
R_1n0fsQ5lQY7wTVk	Yes, Female		White	Yes	You: 540 Other: 280	You: 560 Other: 300	You: 580 Other: 320	You: 560 Other: 300	You: 560 Other: 300	You: 570 Other: 300	You: 560 Other: 300	You: 550 Other: 300	You: 540 Other: 300	Agree	Strongly agree	Agree	Neutral	Neutral	Agree	Neutral	Neutral	37	12	48	39	40	75	64	51	40	35	29	70	78	100	4	4	3	5	3	4
R_21Am0iXTDfXFZQc	Yes, Male		White	No	You: 480 Other: 80	You: 500 Other: 100	You: 520 Other: 120	You: 500 Other: 100	You: 490 Other: 90	You: 500 Other: 100	You: 510 Other: 110	You: 500 Other: 100	You: 480 Other: 100	Disagree	Agree	Agree	Agree	Disagree	Agree	Agree	Agree	70	29	74	41	59	52	42	62	60	40	61	39	40	60	3	2	4	4	4	3
R_2xMpOPdVuDCIs35	Yes, Male		White	No	You: 540 Other: 280	You: 560 Other: 300	You: 520 Other: 120	You: 560 Other: 300	You: 490 Other: 90	You: 570 Other: 300	You: 560 Other: 300	You: 550 Other: 300	You: 540 Other: 300	Disagree	Agree	Strongly disagree	Agree	Neutral	Agree	Neutral	Agree	85	70	70	60	90	25	40	30	60	75	59	40	41	61	3	3	2	4	3	3
R_31sCNmZoIJR3WCU	Yes, Female		Asian	No	You: 540 Other: 280	You: 500 Other: 500	You: 580 Other: 320	You: 560 Other: 300	You: 560 Other: 300	You: 570 Other: 300	You: 560 Other: 300	You: 500 Other: 500	You: 490 Other: 490	Disagree	Strongly agree	Disagree	Strongly agree	Disagree	Strongly agree	Neutral	Agree	85	15	29	100	37	50	60	37	36	66	75	61	53	79	2	1	5	3	3	4
R_3snMIgXwNSNg6Xv	Yes, Female		White	No	You: 480 Other: 80	You: 500 Other: 100	You: 520 Other: 120	You: 500 Other: 100	You: 490 Other: 90	You: 570 Other: 300	You: 510 Other: 110	You: 500 Other: 100	You: 480 Other: 100	Strongly disagree	Agree	Disagree	Strongly agree	Neutral	Agree	Strongly disagree	Agree	70	0	39	18	96	51	70	18	30	59	91	51	64	95	4	3	2	4	3	2
R_2xWuFgDDgyC291Y	Yes, Female		Asian	No	You: 540 Other: 280	You: 560 Other: 300	You: 580 Other: 320	You: 560 Other: 300	You: 560 Other: 300	You: 570 Other: 300	You: 560 Other: 300	You: 550 Other: 300	You: 540 Other: 300	Neutral	Agree	Disagree	Agree	Disagree	Agree	Neutral	Neutral	38	30	13	64	48	74	62	32	25	84	36	65	65	100	3	4	3	3	3	3
R_2D0ove9toKig0C6	Yes, Female		White	No	You: 480 Other: 480	You: 500 Other: 500	You: 520 Other: 520	You: 490 Other: 490	You: 500 Other: 500	You: 500 Other: 500	You: 510 Other: 510	You: 500 Other: 500	You: 490 Other: 490	Neutral	Strongly agree	Neutral	Strongly agree	Disagree	Agree	Strongly agree	Strongly agree	79	26	50	50	68	34	50	50	60	58	81	58	59	93	3	1	3	5	5	5
R_snbQvPiW4mrz9dL	Yes, Male		White	No	You: 540 Other: 280	You: 500 Other: 500	You: 520 Other: 520	You: 490 Other: 490	You: 500 Other: 500	You: 500 Other: 500	You: 510 Other: 510	You: 500 Other: 500	You: 490 Other: 490	Disagree	Strongly agree	Neutral	Strongly agree	Disagree	Neutral	Agree	Agree	100	25	65	60	60	41	65	55	52	45	70	60	55	55	3	3	4	4	3	4
R_tQkhDmTVjIyuox3	Yes, Female		White	No	You: 540 Other: 280	You: 560 Other: 300	You: 580 Other: 320	You: 560 Other: 300	You: 560 Other: 300	You: 570 Other: 300	You: 560 Other: 300	You: 500 Other: 500	You: 540 Other: 300	Disagree	Strongly agree	Disagree	Agree	Disagree	Agree	Neutral	Agree	85	24	75	25	86	52	28	71	88	34	90	34	39	70	2	2	4	4	4	5
R_2YWbpeR8KNmrk13	Yes, Female		White	No	You: 480 Other: 480	You: 500 Other: 500	You: 520 Other: 520	You: 490 Other: 490	You: 500 Other: 500	You: 500 Other: 500	You: 510 Other: 510	You: 500 Other: 500	You: 490 Other: 490	Strongly disagree	Strongly agree	Disagree	Strongly agree	Strongly disagree	Strongly agree	Agree	Strongly agree	30	10	35	40	70	90	40	5	60	35	60	40	40	40	1	1	5	4	4	4
R_1KfHSl1RnyxCDhg	Yes, Male		White	No	You: 540 Other: 280	You: 560 Other: 300	You: 580 Other: 320	You: 560 Other: 300	You: 560 Other: 300	You: 570 Other: 300	You: 560 Other: 300	You: 550 Other: 300	You: 540 Other: 300	Disagree	Agree	Neutral	Strongly agree	Disagree	Strongly agree	Agree	Neutral	41	40	27	50	82	81	51	63	39	89	91	59	59	53	2	2	4	5	4	5
R_1Fstlwi4WrcGmsj	Yes, Female		Some Other	No	You: 540 Other: 280	You: 500 Other: 500	You: 520 Other: 520	You: 560 Other: 300	You: 500 Other: 500	You: 570 Other: 300	You: 510 Other: 510	You: 550 Other: 300	You: 540 Other: 300	Agree	Agree	Agree	Agree	Agree	Neutral	Disagree	Disagree	15	62	75	35	75	86	76	34	78	90	74	26	24	32	2	2	4	4	2	2
R_ReGsyBTtLg5ccRr	Yes, Female		Asian	No	You: 480 Other: 480	You: 500 Other: 500	You: 520 Other: 520	You: 490 Other: 490	You: 500 Other: 500	You: 500 Other: 500	You: 510 Other: 510	You: 500 Other: 500	You: 490 Other: 490	Disagree	Agree	Agree	Agree	Disagree	Agree	Agree	Agree	75	26	52	57	77	58	58	55	51	58	81	58	59	74	3	2	4	2	2	3
R_BunHSTFEOQYRMXL	Yes, Male		Asian	No	You: 480 Other: 480	You: 500 Other: 500	You: 520 Other: 520	You: 490 Other: 490	You: 500 Other: 500	You: 500 Other: 500	You: 510 Other: 510	You: 500 Other: 500	You: 490 Other: 490	Agree	Agree	Agree	Agree	Agree	Neutral	Disagree	Neutral	51	26	27	38	37	69	87	35	58	85	57	46	89	74	4	3	1	5	3	3
R_1EWqXlALUTuBqk2	Yes, Male		Some Other	Yes	You: 540 Other: 280	You: 500 Other: 500	You: 520 Other: 520	You: 560 Other: 300	You: 560 Other: 300	You: 500 Other: 500	You: 510 Other: 510	You: 500 Other: 500	You: 540 Other: 300	Agree	Agree	Agree	Agree	Neutral	Neutral	Neutral	Neutral	60	60	45	75	55	75	65	45	50	70	50	75	60	60	3	4	2	3	3	3
R_2Qn4I2el8Ke4uDM	Yes, Male		Asian	No	You: 540 Other: 280	You: 560 Other: 300	You: 580 Other: 320	You: 560 Other: 300	You: 500 Other: 500	You: 500 Other: 100	You: 560 Other: 300	You: 550 Other: 300	You: 490 Other: 490	Agree	Strongly agree	Neutral	Agree	Disagree	Agree	Agree	Agree	48	52	57	46	59	61	43	63	65	28	78	38	29	25	2	2	4	4	4	4
R_3xDj76rri16ZHhL	Yes, Female		Asian	No	You: 480 Other: 480	You: 500 Other: 500	You: 520 Other: 520	You: 490 Other: 490	You: 500 Other: 500	You: 500 Other: 500	You: 510 Other: 510	You: 500 Other: 500	You: 490 Other: 490	Disagree	Agree	Neutral	Agree	Neutral	Neutral	Neutral	Agree	64	56	53	69	58	65	77	63	61	49	69	76	73	85	2	3	4	4	3	3
R_1NDG73EpI8id6K5	Yes, Female		White	No	You: 480 Other: 480	You: 500 Other: 500	You: 520 Other: 520	You: 490 Other: 490	You: 500 Other: 500	You: 500 Other: 500	You: 560 Other: 300	You: 550 Other: 300	You: 490 Other: 490	Disagree	Strongly agree	Disagree	Strongly agree	Disagree	Agree	Agree	Strongly agree	24	7	68	57	63	60	60	35	66	26	55	76	60	66	1	1	5	4	3	4
R_R5oLku3owL1SYZr	Yes, Male		Asian	No	You: 540 Other: 280	You: 560 Other: 300	You: 580 Other: 320	You: 560 Other: 300	You: 560 Other: 300	You: 570 Other: 300	You: 560 Other: 300	You: 550 Other: 300	You: 540 Other: 300	Strongly disagree	Strongly agree	Disagree	Strongly agree	Disagree	Agree	Agree	Strongly agree	87	38	88	85	95	70	35	87	78	72	90	61	35	86	1	2	3	4	5	5
R_1E71lleLZ6vhgvB	Yes, Female		White	No	You: 480 Other: 480	You: 500 Other: 500	You: 580 Other: 320	You: 560 Other: 300	You: 560 Other: 300	You: 500 Other: 500	You: 510 Other: 510	You: 500 Other: 500	You: 490 Other: 490	Agree	Strongly agree	Disagree	Agree	Neutral	Neutral	Agree	Agree	25	25	25	88	84	40	79	17	38	63	62	85	76	90	2	1	4	5	4	4
R_t06wmHBrnfVXmZr	Yes, Male		Asian	No	You: 540 Other: 280	You: 560 Other: 300	You: 580 Other: 320	You: 560 Other: 300	You: 560 Other: 300	You: 570 Other: 300	You: 560 Other: 300	You: 550 Other: 300	You: 540 Other: 300	Neutral	Neutral	Neutral	Neutral	Neutral	Neutral	Neutral	Neutral	51	49	51	51	52	49	50	49	51	50	51	50	50	48	3	3	3	3	3	3
R_2c7byHzy1yCH1wN	Yes, Female		Asian	No	You: 480 Other: 480	You: 500 Other: 500	You: 520 Other: 520	You: 490 Other: 490	You: 500 Other: 500	You: 500 Other: 500	You: 510 Other: 510	You: 500 Other: 500	You: 490 Other: 490	Disagree	Agree	Agree	Strongly agree	Disagree	Agree	Agree	Strongly agree	80	25	60	90	40	40	25	60	75	65	75	45	75	90	2	2	4	3	2	2
R_QnBK85NvEs9qU2R	Yes, Female		White	No	You: 480 Other: 480	You: 500 Other: 500	You: 520 Other: 520	You: 490 Other: 490	You: 500 Other: 500	You: 500 Other: 500	You: 510 Other: 510	You: 500 Other: 500	You: 490 Other: 490	Disagree	Strongly agree	Disagree	Strongly agree	Disagree	Strongly agree	Neutral	Agree	35	43	63	66	84	51	26	26	65	57	92	62	82	65	1	4	4	5	5	5
R_ebvYTzR5Fx6dwdj	Yes, Male		Black or African-American	No	You: 480 Other: 480	You: 500 Other: 500	You: 520 Other: 520	You: 560 Other: 300	You: 500 Other: 500	You: 500 Other: 500	You: 510 Other: 510	You: 500 Other: 500	You: 540 Other: 300	Disagree	Agree	Agree	Strongly agree	Disagree	Agree	Strongly agree	Strongly agree	60	10	61	74	75	65	74	14	60	74	74	34	65	90	2	2	4	5	5	5
R_3lymrxs2JewFVpc	Yes, Female		White	Yes	You: 480 Other: 480	You: 500 Other: 500	You: 520 Other: 520	You: 490 Other: 490	You: 500 Other: 500	You: 500 Other: 500	You: 510 Other: 510	You: 500 Other: 500	You: 490 Other: 490	Agree	Strongly agree	Agree	Strongly agree	Disagree	Neutral	Agree	Agree	50	0	100	50	75	25	50	40	35	62	63	90	83	92	3	1	3	5	5	5
R_3hyDQUPa4AtUoW1	Yes, Female		White	Yes	You: 540 Other: 280	You: 560 Other: 300	You: 580 Other: 320	You: 560 Other: 300	You: 560 Other: 300	You: 570 Other: 300	You: 560 Other: 300	You: 550 Other: 300	You: 540 Other: 300	Neutral	Agree	Agree	Agree	Neutral	Agree	Neutral	Neutral	49	24	84	33	86	74	50	57	59	76	60	50	60	61	1	1	2	4	4	3
R_2aLvF78LUYJ2ZMc	Yes, Female		Asian	No	You: 540 Other: 280	You: 560 Other: 300	You: 580 Other: 320	You: 560 Other: 300	You: 560 Other: 300	You: 570 Other: 300	You: 560 Other: 300	You: 550 Other: 300	You: 540 Other: 300	Agree	Strongly agree	Agree	Strongly agree	Disagree	Agree	Agree	Agree	75	65	65	60	85	55	60	60	90	50	65	30	60	55	2	2	5	4	3	3
R_1DMtkwEb4ury9kJ	Yes, Male		White	No	You: 540 Other: 280	You: 560 Other: 300	You: 580 Other: 320	You: 560 Other: 300	You: 560 Other: 300	You: 570 Other: 300	You: 560 Other: 300	You: 550 Other: 300	You: 540 Other: 300	Disagree	Agree	Strongly agree	Strongly agree	Disagree	Agree	Agree	Agree	60	54	42	38	75	53	70	40	43	45	64	35	57	76	2	2	4	5	5	5
R_2f0TDlrFiLum8xY	Yes, Female		White	No	You: 540 Other: 280	You: 500 Other: 500	You: 520 Other: 520	You: 560 Other: 300	You: 560 Other: 300	You: 570 Other: 300	You: 510 Other: 510	You: 500 Other: 500	You: 490 Other: 490	Agree	Agree	Agree	Agree	Disagree	Agree	Agree	Agree	66	33	51	65	66	75	63	31	70	24	67	55	65	66	1	1	3	4	2	2
R_2aQ7aMs7B0PtJLF	Yes, Male		White	No	You: 480 Other: 480	You: 500 Other: 500	You: 520 Other: 520	You: 490 Other: 490	You: 500 Other: 500	You: 500 Other: 500	You: 510 Other: 510	You: 500 Other: 500	You: 490 Other: 490	Agree	Strongly agree	Agree	Agree	Neutral	Agree	Neutral	Agree	64	18	67	27	98	65	39	45	89	65	58	36	42	65	5	2	4	4	4	2
R_ZD1fgWyPBxxzdap	Yes, Female		White	No	You: 540 Other: 280	You: 500 Other: 500	You: 580 Other: 320	You: 490 Other: 490	You: 500 Other: 500	You: 500 Other: 500	You: 510 Other: 510	You: 500 Other: 500	You: 490 Other: 490	Disagree	Strongly agree	Disagree	Strongly agree	Disagree	Agree	Neutral	Neutral	76	24	51	57	63	27	37	28	68	25	88	51	61	62	2	2	4	4	4	3
R_23dDQnoQ9k56O4z	Yes, Male		Hawaiian Northern & Pacific Islander	No	You: 540 Other: 280	You: 560 Other: 300	You: 580 Other: 320	You: 560 Other: 300	You: 560 Other: 300	You: 570 Other: 300	You: 560 Other: 300	You: 550 Other: 300	You: 540 Other: 300	Disagree	Strongly agree	Agree	Agree	Disagree	Agree	Agree	Agree	68	26	62	36	74	76	27	27	75	62	75	75	73	77	3	2	4	4	4	4
R_57TfptTshgtORoJ	Yes, Male		Asian	No	You: 540 Other: 280	You: 560 Other: 300	You: 580 Other: 320	You: 560 Other: 300	You: 560 Other: 300	You: 570 Other: 300	You: 560 Other: 300	You: 550 Other: 300	You: 540 Other: 300	Disagree	Strongly agree	Agree	Strongly agree	Strongly disagree	Agree	Agree	Strongly agree	25	21	60	30	82	29	68	60	70	62	97	35	39	75	1	1	4	4	4	4
R_1OBvbTfTgfWpU1k	Yes, Male		Asian	No	You: 540 Other: 280	You: 560 Other: 300	You: 580 Other: 320	You: 560 Other: 300	You: 560 Other: 300	You: 570 Other: 300	You: 560 Other: 300	You: 550 Other: 300	You: 540 Other: 300	Disagree	Agree	Agree	Strongly agree	Disagree	Agree	Agree	Strongly agree	65	0	70	75	40	90	76	25	25	100	50	40	75	100	1	1	5	2	4	2
R_2Squ5Xh9gVUooYm	Yes, Female		White	Yes	You: 540 Other: 280	You: 560 Other: 300	You: 580 Other: 320	You: 560 Other: 300	You: 560 Other: 300	You: 570 Other: 300	You: 560 Other: 300	You: 550 Other: 300	You: 540 Other: 300	Neutral	Agree	Disagree	Agree	Neutral	Neutral	Disagree	Neutral	86	74	70	90	44	35	91	65	32	29	67	69	70	40	2	1	5	3	3	4
R_3GuF1CnjADQ4th6	Yes, Female		White	No	You: 480 Other: 480	You: 500 Other: 500	You: 520 Other: 520	You: 490 Other: 490	You: 500 Other: 500	You: 500 Other: 500	You: 510 Other: 510	You: 500 Other: 500	You: 490 Other: 490	Disagree	Agree	Disagree	Agree	Agree	Agree	Neutral	Agree	87	19	40	77	86	92	63	36	41	74	63	30	69	78	3	2	4	4	3	3
R_Ah5wsJRbYFSrugh	Yes, Male		White	No	You: 540 Other: 280	You: 500 Other: 500	You: 520 Other: 520	You: 490 Other: 490	You: 500 Other: 500	You: 500 Other: 500	You: 510 Other: 510	You: 500 Other: 500	You: 540 Other: 300	Disagree	Strongly agree	Agree	Strongly agree	Disagree	Strongly agree	Agree	Strongly agree	75	30	80	90	90	85	40	60	80	55	80	20	50	65	2	2	4	5	4	4
R_3MPOHRFymHTwNvu	Yes, Male		White	No	You: 540 Other: 280	You: 500 Other: 100	You: 580 Other: 320	You: 560 Other: 300	You: 560 Other: 300	You: 570 Other: 300	You: 560 Other: 300	You: 550 Other: 300	You: 540 Other: 300	Agree	Strongly agree	Agree	Strongly agree	Disagree	Strongly agree	Agree	Strongly agree	73	15	82	35	75	50	29	75	85	21	90	35	70	40	1	4	5	5	4	3
R_qW8E5seySqJMhDb	Yes, Male		Asian	No	You: 480 Other: 480	You: 500 Other: 500	You: 520 Other: 520	You: 490 Other: 490	You: 500 Other: 500	You: 500 Other: 500	You: 510 Other: 510	You: 500 Other: 500	You: 540 Other: 300	Disagree	Agree	Neutral	Agree	Disagree	Agree	Neutral	Agree	60	25	60	40	75	65	65	40	65	35	60	70	65	65	2	3	4	4	4	4
R_b89TRzlde4my9yx	Yes, Female	My sex is female and my gender is woman	Some Other	No	You: 540 Other: 280	You: 560 Other: 300	You: 580 Other: 320	You: 560 Other: 300	You: 560 Other: 300	You: 570 Other: 300	You: 560 Other: 300	You: 550 Other: 300	You: 490 Other: 490	Disagree	Strongly agree	Agree	Strongly agree	Disagree	Strongly agree	Neutral	Neutral	76	26	68	44	77	51	70	61	83	93	77	69	61	83	3	1	4	3	4	4
R_YSSiS8g6wZu1vUd	Yes, Male		White	Yes	You: 480 Other: 480	You: 500 Other: 500	You: 520 Other: 520	You: 490 Other: 490	You: 500 Other: 500	You: 500 Other: 500	You: 510 Other: 510	You: 500 Other: 500	You: 490 Other: 490	Disagree	Neutral	Agree	Agree	Neutral	Agree	Neutral	Agree	50	25	62	65	70	25	70	40	30	40	75	40	75	81	1	2	4	5	4	5
R_2ciKq5mDg7doFX4	Yes, Female		Black or African-American	No	You: 540 Other: 280	You: 500 Other: 500	You: 580 Other: 320	You: 560 Other: 300	You: 560 Other: 300	You: 570 Other: 300	You: 510 Other: 510	You: 500 Other: 500	You: 540 Other: 300	Disagree	Agree	Agree	Strongly agree	Neutral	Agree	Neutral	Agree	25	80	70	70	95	50	40	65	45	25	90	25	35	90	2	3	4	5	2	2
R_1IgG50MWAhigQ93	Yes, Female		Asian	No	You: 480 Other: 480	You: 500 Other: 500	You: 520 Other: 520	You: 490 Other: 490	You: 560 Other: 300	You: 500 Other: 500	You: 510 Other: 510	You: 500 Other: 500	You: 490 Other: 490	Strongly disagree	Strongly agree	Strongly disagree	Strongly agree	Strongly disagree	Strongly agree	Strongly agree	Agree	40	10	60	55	75	61	65	29	80	30	84	23	55	68	2	1	4	2	4	2
R_3h3o7eUyG0NB8tR	Yes, Female		Asian	No	You: 540 Other: 280	You: 560 Other: 300	You: 580 Other: 320	You: 560 Other: 300	You: 560 Other: 300	You: 570 Other: 300	You: 560 Other: 300	You: 550 Other: 300	You: 540 Other: 300	Agree	Agree	Agree	Strongly agree	Neutral	Agree	Neutral	Agree	77	6	74	59	74	21	59	37	60	25	84	60	43	18	1	1	4	5	4	5
R_27QcJnZTHEZdVqc	Yes, Female		Asian	No	You: 480 Other: 480	You: 500 Other: 500	You: 520 Other: 520	You: 490 Other: 490	You: 500 Other: 500	You: 500 Other: 500	You: 510 Other: 510	You: 500 Other: 500	You: 490 Other: 490	Disagree	Agree	Neutral	Strongly agree	Disagree	Agree	Agree	Strongly agree	71	68	65	45	77	82	37	60	84	35	100	59	50	71	2	2	5	5	4	4
R_0GPpumpg41BR7b3	Yes, Female		White	Yes	You: 540 Other: 280	You: 560 Other: 300	You: 580 Other: 320	You: 560 Other: 300	You: 560 Other: 300	You: 570 Other: 300	You: 560 Other: 300	You: 550 Other: 300	You: 540 Other: 300	Disagree	Agree	Strongly disagree	Strongly agree	Disagree	Agree	Neutral	Agree	62	25	64	64	74	8	82	51	33	43	43	78	77	82	1	3	3	4	4	4
R_1FqZcA6ZccstPWI	Yes, Male		Some Other	Yes	You: 480 Other: 480	You: 500 Other: 500	You: 520 Other: 520	You: 490 Other: 490	You: 500 Other: 500	You: 500 Other: 500	You: 510 Other: 510	You: 500 Other: 500	You: 490 Other: 490	Disagree	Strongly agree	Agree	Strongly agree	Disagree	Disagree	Agree	Agree	40	40	40	70	60	30	70	40	40	70	100	30	90	30	2	1	4	5	3	3
R_aWxu7unKjucC6zL	Yes, Female		Asian	No	You: 480 Other: 480	You: 500 Other: 500	You: 520 Other: 520	You: 490 Other: 490	You: 560 Other: 300	You: 570 Other: 300	You: 510 Other: 510	You: 550 Other: 300	You: 490 Other: 490	Disagree	Strongly agree	Disagree	Agree	Strongly disagree	Agree	Agree	Agree	25	10	40	60	20	70	60	30	50	35	65	60	60	70	2	1	4	5	5	4
R_24OafuMBcWJEU6Y	Yes, Male		White	No	You: 540 Other: 280	You: 500 Other: 500	You: 520 Other: 520	You: 490 Other: 490	You: 500 Other: 500	You: 500 Other: 500	You: 510 Other: 510	You: 500 Other: 500	You: 490 Other: 490	Agree	Agree	Agree	Agree	Agree	Neutral	Neutral	Strongly agree	25	25	60	65	65	40	70	60	38	75	70	40	65	91	2	2	4	5	2	1
R_23fOpzeIvMAY5vS			White	No	You: 540 Other: 280	You: 560 Other: 300	You: 580 Other: 320	You: 560 Other: 300	You: 560 Other: 300	You: 570 Other: 300	You: 560 Other: 300	You: 550 Other: 300	You: 540 Other: 300	Disagree	Strongly agree	Strongly agree	Strongly agree	Disagree	Strongly agree	Agree	Strongly agree	77	71	79	75	76	28	55	42	44	58	44	61	67	45	1	1	5	4	5	5
R_6qW3R7B8NzfHg6B	Yes, Female		White	No	You: 480 Other: 80	You: 500 Other: 100	You: 520 Other: 120	You: 500 Other: 100	You: 490 Other: 90	You: 500 Other: 100	You: 510 Other: 110	You: 500 Other: 100	You: 480 Other: 100	Disagree	Agree	Disagree	Strongly agree	Disagree	Agree	Agree	Strongly agree	40	35	60	40	80	60	36	60	65	60	65	30	41	70	2	2	4	4	3	4
R_2aEMCzAEnCfwKtK	Yes, Female		American Indian or Alaskan Native	No	You: 480 Other: 480	You: 500 Other: 500	You: 520 Other: 520	You: 490 Other: 490	You: 500 Other: 500	You: 500 Other: 500	You: 510 Other: 510	You: 500 Other: 500	You: 490 Other: 490	Disagree	Strongly agree	Neutral	Strongly agree	Neutral	Strongly agree	Agree	Agree	64	16	62	93	87	68	25	76	63	75	75	26	58	64	1	1	4	4	3	4
R_wS4yDECtiabkPQt	Yes, Female		White	No	You: 480 Other: 80	You: 560 Other: 300	You: 520 Other: 120	You: 560 Other: 300	You: 490 Other: 90	You: 570 Other: 300	You: 510 Other: 110	You: 500 Other: 100	You: 540 Other: 300	Disagree	Agree	Strongly disagree	Agree	Strongly disagree	Agree	Agree	Strongly agree	63	61	8	40	46	74	84	33	48	78	34	93	95	91	3	5	3	3	4	4
R_10GZNXzOONikj3U	Yes, Female		White	No	You: 540 Other: 280	You: 560 Other: 300	You: 580 Other: 320	You: 560 Other: 300	You: 560 Other: 300	You: 570 Other: 300	You: 560 Other: 300	You: 550 Other: 300	You: 540 Other: 300	Agree	Strongly agree	Disagree	Agree	Agree	Neutral	Disagree	Agree	93	17	29	25	25	100	85	25	65	50	35	85	60	50	5	3	4	4	3	2
R_2uZDE8V6ru9u8M8	Yes, Female		Some Other	No	You: 540 Other: 280	You: 560 Other: 300	You: 580 Other: 320	You: 560 Other: 300	You: 560 Other: 300	You: 570 Other: 300	You: 560 Other: 300	You: 550 Other: 300	You: 540 Other: 300	Disagree	Agree	Agree	Agree	Disagree	Agree	Agree	Agree	68	5	28	25	73	36	68	23	51	78	71	63	76	74	2	2	4	4	2	4
R_BxeYidrkCCFaQPD	Yes, Female		White	No	You: 540 Other: 280	You: 560 Other: 300	You: 580 Other: 320	You: 560 Other: 300	You: 560 Other: 300	You: 570 Other: 300	You: 560 Other: 300	You: 550 Other: 300	You: 540 Other: 300	Neutral	Agree	Neutral	Agree	Disagree	Neutral	Agree	Agree	40	10	30	80	60	66	58	26	47	66	74	83	85	67	4	3	4	5	5	4
R_2639gX342SZyHBS	Yes, Female		White	No	You: 540 Other: 280	You: 500 Other: 100	You: 580 Other: 320	You: 560 Other: 300	You: 560 Other: 300	You: 570 Other: 300	You: 510 Other: 110	You: 550 Other: 300	You: 540 Other: 300	Strongly disagree	Agree	Agree	Strongly agree	Strongly disagree	Agree	Neutral	Disagree	76	65	89	85	43	58	24	73	18	15	85	5	85	94	4	3	4	4	2	2
R_2zi7kyJFV5JmmDs	Yes, Female		White	Yes	You: 540 Other: 280	You: 560 Other: 300	You: 580 Other: 320	You: 560 Other: 300	You: 560 Other: 300	You: 570 Other: 300	You: 560 Other: 300	You: 550 Other: 300	You: 540 Other: 300	Disagree	Strongly agree	Agree	Strongly agree	Disagree	Strongly agree	Agree	Agree	40	10	40	40	15	65	60	37	22	44	75	61	39	61	4	2	2	5	5	5
R_2uBZEPkFktiuvQa	Yes, Male		White	No	You: 480 Other: 80	You: 500 Other: 100	You: 520 Other: 120	You: 500 Other: 100	You: 490 Other: 90	You: 500 Other: 100	You: 510 Other: 110	You: 500 Other: 100	You: 480 Other: 100	Neutral	Agree	Neutral	Agree	Agree	Agree	Agree	Agree	14	17	17	50	67	62	64	37	56	67	34	59	57	30	3	5	4	3	3	2
R_3DcFraHTdwbJxf8	Yes, Male		Black or African-American	No	You: 480 Other: 480	You: 500 Other: 500	You: 520 Other: 520	You: 490 Other: 490	You: 500 Other: 500	You: 500 Other: 500	You: 510 Other: 510	You: 500 Other: 500	You: 490 Other: 490	Disagree	Strongly agree	Disagree	Agree	Neutral	Agree	Neutral	Agree	70	10	50	75	85	5	80	20	60	50	65	30	51	90	4	3	2	4	2	2
R_pKsM4FOBpLdbbjP	Yes, Female		White	No	You: 540 Other: 280	You: 560 Other: 300	You: 580 Other: 320	You: 560 Other: 300	You: 560 Other: 300	You: 570 Other: 300	You: 560 Other: 300	You: 550 Other: 300	You: 540 Other: 300	Disagree	Agree	Disagree	Strongly agree	Disagree	Agree	Neutral	Neutral	44	34	51	45	58	56	50	38	51	65	38	56	57	72	2	2	4	4	4	3
R_bdUoDlGd5lMNy93	No, I do not identify as male or female	nothing	White	No	You: 540 Other: 280	You: 560 Other: 300	You: 580 Other: 320	You: 560 Other: 300	You: 560 Other: 300	You: 570 Other: 300	You: 560 Other: 300	You: 550 Other: 300	You: 540 Other: 300	Disagree	Strongly agree	Neutral	Strongly agree	Strongly disagree	Agree	Neutral	Strongly agree	40	11	0	23	51	63	50	0	43	75	75	75	77	100	2	2	4	5	5	5
R_2XolfpktqCkk58F	Yes, Female		White	No	You: 540 Other: 280	You: 560 Other: 300	You: 580 Other: 320	You: 560 Other: 300	You: 560 Other: 300	You: 570 Other: 300	You: 560 Other: 300	You: 550 Other: 300	You: 540 Other: 300	Disagree	Agree	Disagree	Agree	Disagree	Agree	Agree	Agree	67	39	60	43	79	27	37	68	80	37	73	43	55	63	2	3	3	4	4	3
R_3FL3Si8ZE288yws	Yes, Female		Asian	No	You: 480 Other: 480	You: 500 Other: 500	You: 520 Other: 520	You: 560 Other: 300	You: 500 Other: 500	You: 570 Other: 300	You: 510 Other: 510	You: 500 Other: 500	You: 490 Other: 490	Disagree	Agree	Strongly disagree	Agree	Disagree	Agree	Neutral	Neutral	45	25	50	10	60	50	65	40	90	50	40	55	65	75	1	1	5	5	5	5
R_2QmTVxjvU7pj3LV	Yes, Female		Asian	No	You: 480 Other: 480	You: 500 Other: 500	You: 520 Other: 520	You: 560 Other: 300	You: 500 Other: 500	You: 500 Other: 500	You: 510 Other: 510	You: 500 Other: 500	You: 490 Other: 490	Disagree	Agree	Agree	Agree	Agree	Agree	Neutral	Neutral	82	17	29	40	80	65	36	50	70	78	60	39	35	60	2	1	5	3	3	4
R_bBhHF5T8excX4B3	Yes, Female		White	No	You: 540 Other: 280	You: 560 Other: 300	You: 580 Other: 320	You: 560 Other: 300	You: 560 Other: 300	You: 570 Other: 300	You: 560 Other: 300	You: 550 Other: 300	You: 540 Other: 300	Agree	Strongly agree	Disagree	Strongly agree	Disagree	Strongly agree	Strongly agree	Strongly agree	66	35	62	75	60	36	60	43	29	36	56	58	64	91	3	1	2	2	4	3
R_2QFCpIN0otkEndi	Yes, Female		Asian	No	You: 480 Other: 480	You: 500 Other: 500	You: 520 Other: 520	You: 490 Other: 490	You: 500 Other: 500	You: 500 Other: 500	You: 510 Other: 510	You: 500 Other: 100	You: 540 Other: 300	Disagree	Strongly agree	Disagree	Agree	Disagree	Agree	Agree	Agree	45	25	40	60	40	66	65	40	31	75	50	60	75	70	2	1	3	4	4	4
R_1loOTw1ltapndhW	Yes, Female		Black or African-American	No	You: 540 Other: 280	You: 560 Other: 300	You: 580 Other: 320	You: 560 Other: 300	You: 560 Other: 300	You: 570 Other: 300	You: 560 Other: 300	You: 550 Other: 300	You: 540 Other: 300	Disagree	Strongly agree	Strongly disagree	Strongly agree	Disagree	Agree	Neutral	Agree	25	14	23	60	16	51	20	45	39	51	35	25	51	80	1	1	4	3	2	2
R_0dijvOxaBfGNsml	Yes, Female		Hawaiian Northern & Pacific Islander	No	You: 480 Other: 480	You: 500 Other: 500	You: 520 Other: 520	You: 490 Other: 490	You: 500 Other: 500	You: 500 Other: 500	You: 510 Other: 510	You: 500 Other: 500	You: 490 Other: 490	Disagree	Neutral	Disagree	Agree	Disagree	Agree	Neutral	Agree	0	40	0	40	100	50	40	40	60	66	46	37	64	100	5	1	3	2	2	2
R_XAOY3594be69bJD	Yes, Male		White	No	You: 540 Other: 280	You: 560 Other: 300	You: 580 Other: 320	You: 560 Other: 300	You: 560 Other: 300	You: 570 Other: 300	You: 560 Other: 300	You: 550 Other: 300	You: 540 Other: 300	Agree	Agree	Agree	Agree	Agree	Agree	Neutral	Agree	63	12	61	48	34	38	66	64	58	69	64	61	68	56	3	4	3	5	2	3
R_3HzaU2NahaOMR7x	Yes, Female		White	Yes	You: 540 Other: 280	You: 560 Other: 300	You: 580 Other: 320	You: 560 Other: 300	You: 560 Other: 300	You: 570 Other: 300	You: 560 Other: 300	You: 550 Other: 300	You: 540 Other: 300	Disagree	Agree	Disagree	Strongly agree	Disagree	Agree	Neutral	Agree	66	25	55	69	50	12
R_3PbeZIA38JO2JxN	Yes, Male		Asian	No	You: 540 Other: 280	You: 560 Other: 300	You: 580 Other: 320	You: 560 Other: 300	You: 560 Other: 300	You: 570 Other: 300	You: 560 Other: 300	You: 550 Other: 300	You: 540 Other: 300	Neutral	Agree	Strongly agree	Neutral	Agree	Neutral	Neutral	Neutral	0	23	14	100	79	100	93	5	35	100	41	100	100	100	5	3	4	5	4	5
R_3fe0XEx6WjGY0nE	Yes, Female		Asian	No	You: 540 Other: 280	You: 560 Other: 300	You: 580 Other: 320	You: 560 Other: 300	You: 560 Other: 300	You: 570 Other: 300	You: 560 Other: 300	You: 550 Other: 300	You: 540 Other: 300	Disagree	Strongly agree	Disagree	Strongly agree	Disagree	Strongly agree	Neutral	Neutral	51	75	83	63	34	75	64	76	75	90	39	90	74	85	2	2	4	5	5	5
R_21oLvcBtXpTRVvX	Yes, Male		Some Other	Yes	You: 540 Other: 280	You: 560 Other: 300	You: 580 Other: 320	You: 560 Other: 300	You: 560 Other: 300	You: 570 Other: 300	You: 560 Other: 300	You: 550 Other: 300	You: 540 Other: 300	Agree	Agree	Agree	Agree	Neutral	Agree	Agree	Agree	45	28	37	51	49	26	41	48	47	62	68	49	51	51	2	3	4	5	5	5
R_2pYlAVxc5agCfPj	Yes, Female		Asian	No	You: 480 Other: 480	You: 500 Other: 500	You: 520 Other: 520
R_21EP17g7H2gBqw5	Yes, Male
R_2CO3P3gdbORzOjN	Yes, Male		White	No	You: 480 Other: 80	You: 500 Other: 100	You: 520 Other: 120	You: 500 Other: 100	You: 490 Other: 90	You: 500 Other: 100	You: 510 Other: 110	You: 500 Other: 100	You: 480 Other: 100	Disagree	Strongly agree	Agree	Strongly agree	Agree	Agree	Disagree	Agree	75	10	83	75	89	51	64	44	40	42	37	38	43	75	3	2	3	4	3	4
R_b8T0si0lwcCDAaJ	Yes, Female		Black or African-American	No	You: 480 Other: 480	You: 560 Other: 300	You: 520 Other: 520	You: 560 Other: 300	You: 500 Other: 500	You: 500 Other: 500	You: 560 Other: 300	You: 500 Other: 500	You: 540 Other: 300	Disagree	Strongly agree	Strongly disagree	Strongly agree	Disagree	Agree	Agree	Agree	51	40	41	52	75	100	77	0	69	24	96	56	62	15	1	1	5	3	4	4
R_11Yk9XaNwR3UBg7
R_1l5mXp2U5SalOXw	Yes, Female		Asian	No	You: 480 Other: 480	You: 500 Other: 500	You: 520 Other: 520	You: 490 Other: 490	You: 500 Other: 500	You: 500 Other: 500	You: 510 Other: 510	You: 500 Other: 500	You: 490 Other: 490	Disagree	Strongly agree	Agree	Strongly agree	Strongly disagree	Agree	Strongly agree	Agree	75	32	80	50	80	65	32	58	66	86	67	35	81	95	1	1	5	5	5	5
R_31dh6dkAIj7SOD8	Yes, Female		Asian	No	You: 540 Other: 280	You: 560 Other: 300	You: 580 Other: 320	You: 560 Other: 300	You: 560 Other: 300	You: 570 Other: 300	You: 560 Other: 300	You: 550 Other: 300	You: 540 Other: 300	Neutral	Strongly agree	Agree	Strongly agree	Disagree	Strongly agree	Strongly agree	Strongly agree	63	26	56	60	54	88	75	35	41	74	59	100	88	74	2	1	5	4	5	5
R_1M6OAfSEH3z3HgG	Yes, Female		Some Other	No	You: 480 Other: 480	You: 500 Other: 500	You: 520 Other: 520	You: 490 Other: 490	You: 500 Other: 500	You: 500 Other: 500	You: 510 Other: 510	You: 500 Other: 500	You: 490 Other: 490	Agree	Agree	Neutral	Agree	Agree	Neutral	Neutral	Agree	23	21	66	64	59	76	77	36	66	59	92	89	64	76	4	1	3	4	2	2
R_263cnkmBvdng1MI	Yes, Female		Black or African-American		You: 540 Other: 280	You: 500 Other: 100	You: 520 Other: 120	You: 560 Other: 300	You: 560 Other: 300	You: 500 Other: 100	You: 560 Other: 300	You: 550 Other: 300	You: 540 Other: 300
R_3GfGdLDLZLjGNNU	Yes, Female		White	No	You: 540 Other: 280	You: 500 Other: 500	You: 580 Other: 320	You: 560 Other: 300	You: 560 Other: 300	You: 570 Other: 300	You: 560 Other: 300	You: 550 Other: 300	You: 540 Other: 300	Agree	Strongly agree	Strongly disagree	Strongly agree	Neutral	Strongly agree	Strongly agree	Strongly agree	85	8	85	80	63	25	32	52	85	21	86	40	55	51	1	1	5	5	4	4
R_AtlJMTt25T2OVix
R_3QWvyZPIWSDp2gN	Yes, Female		White	No	You: 480 Other: 480	You: 500 Other: 500	You: 520 Other: 520	You: 490 Other: 490	You: 500 Other: 500	You: 500 Other: 500	You: 510 Other: 510	You: 500 Other: 500	You: 490 Other: 490	Agree	Agree	Disagree	Strongly agree	Disagree	Agree	Agree	Agree	100	80	95	10	75	15	20	75	85	10	100	0	40	45	4	2	4	3	2	4
R_YSvqPF6EXzUA6ad	Yes, Male		Asian	No	You: 540 Other: 280	You: 560 Other: 300	You: 580 Other: 320	You: 560 Other: 300	You: 560 Other: 300	You: 570 Other: 300	You: 560 Other: 300	You: 550 Other: 300	You: 540 Other: 300	Agree	Agree	Agree	Agree	Strongly disagree	Agree	Agree	Strongly agree
R_1JS1BjI0xXWhgwC	Yes, Female		Black or African-American	No	You: 480 Other: 480	You: 500 Other: 500	You: 520 Other: 520	You: 490 Other: 490	You: 500 Other: 500	You: 500 Other: 500	You: 510 Other: 510	You: 500 Other: 500	You: 490 Other: 490	Disagree	Neutral	Neutral	Agree	Agree	Agree	Neutral	Disagree	40	14	61	58	79	29	36	64	77	42	19	42	61	88	3	4	4	4	2	4
R_3j0Y1H0hLxPoXPe	Yes, Female		Asian	No
R_1l4abnywFUmuoit	Yes, Male		Asian	No	You: 480 Other: 480	You: 500 Other: 500
R_2rwNBbqA7lPrIud	Yes, Female		Some Other	No	You: 480 Other: 480	You: 500 Other: 500	You: 520 Other: 520	You: 490 Other: 490	You: 500 Other: 500	You: 500 Other: 500	You: 510 Other: 510	You: 500 Other: 500	You: 490 Other: 490	Neutral	Strongly agree	Disagree	Strongly agree	Neutral	Agree	Neutral	Agree	77	78	78	77	78	100	77	50	77	53	76	53	76	69	1	1	4	4	4	4
R_1QN52YxFwqnCrBz	Yes, Female
R_SW2X8q5A5JLOtfX	Yes, Male		White	No	You: 540 Other: 280	You: 500 Other: 500	You: 580 Other: 320	You: 560 Other: 300	You: 560 Other: 300	You: 570 Other: 300	You: 560 Other: 300	You: 550 Other: 300	You: 540 Other: 300	Disagree	Strongly agree	Neutral	Strongly agree	Disagree	Strongly agree	Agree	Agree	76	10	69	55	81	51	33	54	42	30	89	30	51	28	2	3	4	3	3	3
R_3qkuc6WZAc9v8s9	Yes, Female		White	No
R_1OJ0xj8TDpTxPp6	Yes, Female		White	No	You: 540 Other: 280	You: 560 Other: 300	You: 580 Other: 320	You: 560 Other: 300	You: 560 Other: 300	You: 570 Other: 300	You: 560 Other: 300	You: 550 Other: 300	You: 540 Other: 300	Disagree	Strongly agree	Agree	Strongly agree	Strongly disagree	Strongly agree	Strongly agree	Strongly agree	94	36	77	91	39	34	18	44	46	23	90	25	29	42	1	2	5	5	5	5
R_XFGvr5RSRfisIBb	Yes, Male		White	No	You: 480 Other: 480	You: 500 Other: 500	You: 520 Other: 520	You: 560 Other: 300	You: 500 Other: 500	You: 500 Other: 500	You: 510 Other: 510	You: 500 Other: 500	You: 490 Other: 490	Disagree	Strongly agree	Agree	Strongly agree	Strongly disagree	Agree	Agree	Strongly agree	37	50	72	51	80	69	50	59	63	25	59	40	58	59	2	2	4	4	4	4
R_2Qf9QjBYr5tDGRy	Yes, Female		Black or African-American	No	You: 480 Other: 80	You: 560 Other: 300	You: 520 Other: 520	You: 560 Other: 300	You: 560 Other: 300	You: 570 Other: 300	You: 560 Other: 300	You: 500 Other: 500	You: 540 Other: 300	Disagree	Agree	Disagree	Agree	Neutral	Neutral	Neutral	Neutral	55	47	64	58	67	59	37	54	90	46	65	50	53	58	2	2	3	4	4	4
R_2rYqdXAxAoUKkt6	Yes, Female		Asian	No	You: 540 Other: 280	You: 560 Other: 300	You: 580 Other: 320	You: 560 Other: 300	You: 560 Other: 300	You: 570 Other: 300	You: 560 Other: 300	You: 500 Other: 100	You: 480 Other: 100	Agree	Strongly agree	Agree	Strongly agree	Disagree	Agree	Neutral	Agree	86	23	0	100	100	48	80	61	82	60	89	62	85	85	4	2	4	4	4	4
R_2tuugobLadalb3y	Yes, Female		White	No	You: 480 Other: 480	You: 500 Other: 500	You: 520 Other: 520	You: 560 Other: 300	You: 560 Other: 300	You: 500 Other: 500	You: 510 Other: 510	You: 500 Other: 500	You: 490 Other: 490	Agree	Neutral	Strongly agree	Strongly agree	Neutral	Agree	Disagree	Agree	10	24	17	2	47	3	52	29	51	73	21	58
R_2s0CgKtTqc75bgV	Yes, Male		Asian	No
R_d1nVbQslnHuYsJr	Yes, Female		White	No	You: 480 Other: 480	You: 500 Other: 500	You: 520 Other: 520	You: 490 Other: 490	You: 500 Other: 500	You: 500 Other: 500	You: 510 Other: 510	You: 500 Other: 500	You: 490 Other: 490	Agree	Strongly agree	Strongly disagree	Agree	Neutral	Disagree	Agree	Agree	50	0	51
R_AgjhflQGFFrlcZP	Yes, Female		Black or African-American	No	You: 480 Other: 80	You: 500 Other: 100	You: 580 Other: 320	You: 560 Other: 300	You: 560 Other: 300	You: 570 Other: 300	You: 560 Other: 300	You: 550 Other: 300	You: 540 Other: 300	Agree	Strongly agree	Agree	Strongly agree	Disagree	Strongly agree	Agree	Neutral	57	10	62	57	80	65	55	46	68	91	27	53	56	53	3	2	1	5	2	4
R_2akjzLPnAhVZAQn	Yes, Male		White	Yes	You: 540 Other: 280	You: 560 Other: 300	You: 580 Other: 320	You: 560 Other: 300	You: 560 Other: 300	You: 570 Other: 300	You: 560 Other: 300	You: 550 Other: 300	You: 540 Other: 300	Agree	Agree	Neutral	Agree	Neutral	Agree	Agree	Agree	80	30	85	25	80	40	40	80	60	60	90	30	60	100	4	3	3	5	3	2
R_3JnqwBFQMTzO0de	Yes, Female		Some Other	No	You: 540 Other: 280	You: 560 Other: 300	You: 520 Other: 520	You: 490 Other: 490	You: 500 Other: 500	You: 500 Other: 500	You: 510 Other: 510	You: 500 Other: 500	You: 490 Other: 490	Disagree	Agree	Disagree	Agree	Disagree	Strongly agree	Agree	Agree	75	25	71	80	80	24	50	30	49	21	81	58	63	87	2	2	4	4	4	4
R_86Ow8qoJxHtMyFH
R_DTubv1jS8jKiz7z	Yes, Male		Asian	No	You: 540 Other: 280	You: 560 Other: 300	You: 580 Other: 320	You: 560 Other: 300	You: 560 Other: 300	You: 570 Other: 300	You: 560 Other: 300	You: 550 Other: 300	You: 540 Other: 300	Neutral	Agree	Agree	Neutral	Agree	Agree	Disagree	Disagree	28	23	61	21	61	55	63	56	24	61	61	38	61	66	3	3	4	3	3	3
R_1ZeVr2xOnVy6Ftn	Yes, Male		Black or African-American	No
R_Dvr12fVluJfjlGp	Yes, Female		Black or African-American	No	You: 540 Other: 280	You: 560 Other: 300	You: 580 Other: 320	You: 560 Other: 300	You: 560 Other: 300	You: 570 Other: 300	You: 560 Other: 300	You: 550 Other: 300	You: 540 Other: 300	Neutral	Agree	Disagree	Agree	Neutral	Agree	Neutral	Agree	51	63	66	42	51	51	55	51	65	55	57	52	58	61	2	2	5	3	2	2
R_1rCZeaJeXFHWQBi	Yes, Female		Asian	No	You: 540 Other: 280	You: 560 Other: 300	You: 520 Other: 120	You: 560 Other: 300	You: 560 Other: 300	You: 570 Other: 300	You: 560 Other: 300	You: 550 Other: 300	You: 540 Other: 300	Agree	Agree	Strongly agree	Disagree	Strongly agree	Agree	Strongly disagree	Strongly disagree	21	19	17	69	22	71	94	22	19	41	48	76	60	97	5	5	2	4	4	2
R_3jUpeigS7qCJAgc	Yes, Female		White	No	You: 480 Other: 480	You: 500 Other: 500	You: 520 Other: 520	You: 490 Other: 490	You: 500 Other: 500	You: 500 Other: 500	You: 510 Other: 510	You: 500 Other: 500	You: 490 Other: 490	Disagree	Agree	Agree	Agree	Disagree	Agree	Agree	Agree	62	63	63	67	71	66	62	78	60	21	44	36	38	24	1	1	4	5	5	5
