# Supplementary material for: Virtual reality perspective-taking increases cognitive empathy for specific others
Source: PLoS One. 2018 Aug 30;13(8):e0202442. doi: 10.1371/journal.pone.0202442 (PMC6116942; doi:10.1371/journal.pone.0202442)
Supplement: S2 File — A .xlsx file with the data that resulted from the time-two experiment described in the paper. (XLSX) [file pone.0202442.s006.xlsx]

## Sheet: Post
Embodied	ParticipantID	OverlappingCircles	ConnectionOne	Connection2	Connection3	Connection4	Connection5	Connection6	Connection7	Connection8	Connection9	Connection10	Connection11	Connection12	PNAS_Interested	PNAS_Distressed	PNAS_Excited	Masculine	PNAS_Upset	PNAS_Strong	PNAS_Guilty	PNAS_Scared	PNAS_Hostile	PNAS_Enthusiastic	PNAS_Proud	PNAS_Irritable	PNAS_Alert	PNAS_Ashamed	PNAS_Inspired	PNAS_Nervous	PNAS_Determined	PNAS_Attentitve	PNAS_Jittery	PNAS_Active	PNAS_Afraid	Feminine	Delete69	Med_Compassionate	Med_Sad	Med_Sympathetic	Med_HeavyHearted	Emp1	Emp2	Emp3	FirstMover	SecondMover	JamesLikeThemP	JamesNicePersonP	JamesSpendTimeP
Steve	R_sBZFyouR4OWKwyB	B	5	3	4	7	4	3	4	Moderately	Strongly	Moderately	Moderately	Moderately	Quite a bit	Very slightly or not at all	Moderately	Very slightly or not at all	Very slightly or not at all	Moderately	Very slightly or not at all	Very slightly or not at all	Very slightly or not at all	Moderately	A little	Very slightly or not at all	Quite a bit	Very slightly or not at all	Moderately	A little	Moderately	Quite a bit	Very slightly or not at all	Moderately	Very slightly or not at all	Quite a bit		6	1	2	1	6	7	6	10	15
Steve	R_8BRBLYwzYwHEwg1	A	3	4	7	8	7	7	1	Strongly	Strongly	Strongly	Not at all	Strongly	Moderately	A little	A little	A little	A little	A little	A little	A little	A little	Moderately	Moderately	A little	Moderately	A little	Quite a bit	A little	Moderately	Moderately	A little	A little	A little	A little		0	0	0	0	0	0	0	0	0
None	R_2rDiyU2ptHiQcqt									Strongly	Strongly	Strongly	Moderately	Strongly	Quite a bit	Very slightly or not at all	Moderately	Moderately	Very slightly or not at all	Moderately	Very slightly or not at all	Very slightly or not at all	Very slightly or not at all	Moderately	A little	Very slightly or not at all	Moderately	Very slightly or not at all	Moderately	Very slightly or not at all	A little	Moderately	Very slightly or not at all	Moderately	Very slightly or not at all	Very slightly or not at all		4	1	1	1	6	6	6	3	15
None	R_3e9oiKtncXu8de4									Strongly	Strongly	Strongly	Slightly	Strongly	Quite a bit	Moderately	Moderately	A little	A little	A little	A little	A little	A little	Moderately	Quite a bit	A little	Very slightly or not at all	Very slightly or not at all	Quite a bit	Very slightly or not at all	Moderately	Quite a bit	Very slightly or not at all	Moderately	Very slightly or not at all	Moderately		7	3	3	3	8	8	10	10	15
James	R_27UtmaQz72JI6bh	D	6	8	8	9	4	6	6	Strongly	Strongly	Moderately	Strongly	Slightly	Quite a bit	Very slightly or not at all	Extremely	Very slightly or not at all	Very slightly or not at all	Very slightly or not at all	Very slightly or not at all	A little	Very slightly or not at all	Moderately	A little	Very slightly or not at all	Very slightly or not at all	Very slightly or not at all	Moderately	Very slightly or not at all	A little	A little	A little	A little	Very slightly or not at all	Very slightly or not at all		7	4	6	6	7	7	6	5	8	76	77	71
James	R_3MhQeHvBFZI5g1S	E	7	7	7	7	8	7	6	Very Strongly	Very Strongly	Very Strongly	Very Strongly	Very Strongly	Quite a bit	Very slightly or not at all	Moderately	Moderately	Very slightly or not at all	Moderately	Very slightly or not at all	Very slightly or not at all	Very slightly or not at all	Quite a bit	Moderately	Very slightly or not at all	Moderately	Very slightly or not at all	Moderately	A little	Moderately	Moderately	A little	A little	Very slightly or not at all	Very slightly or not at all		5	1	5	1	6	3	6	10	15	80	80	85
None	R_2akR2kSTMUU0gkq									Very Strongly	Very Strongly	Very Strongly	Very Strongly	Strongly	Extremely	Very slightly or not at all	Extremely	Moderately	A little	Quite a bit	Very slightly or not at all	Very slightly or not at all	Very slightly or not at all	Extremely	Quite a bit	Very slightly or not at all	Extremely	Very slightly or not at all	Quite a bit	Very slightly or not at all	Quite a bit	Extremely	Very slightly or not at all	Quite a bit	Very slightly or not at all	A little		8	1	5	1	3	5	7	10	15
Steve		D	4	4	4	4	4	4	4	Slightly	Slightly	Slightly	Slightly	Slightly	Very slightly or not at all	Very slightly or not at all	Very slightly or not at all	Very slightly or not at all	Very slightly or not at all	Very slightly or not at all	Very slightly or not at all	Very slightly or not at all	Very slightly or not at all	Very slightly or not at all	Very slightly or not at all	Very slightly or not at all	Very slightly or not at all	Very slightly or not at all	Very slightly or not at all	Very slightly or not at all	Very slightly or not at all	Very slightly or not at all	Very slightly or not at all	Very slightly or not at all	Very slightly or not at all	Very slightly or not at all		5	5	5	5	5	5	5	3	0
Steve	R_3gUuhz8ukeQjeaX	C	3	6	6	6	7	5	4	Strongly	Strongly	Strongly	Very Strongly	Strongly	Quite a bit	Very slightly or not at all	Quite a bit	Very slightly or not at all	A little	Quite a bit	Moderately	Very slightly or not at all	Very slightly or not at all	Quite a bit	A little	Very slightly or not at all	Very slightly or not at all	Very slightly or not at all	Quite a bit	Very slightly or not at all	Quite a bit	Moderately	Very slightly or not at all	Moderately	Very slightly or not at all	A little		7	2	5	4	7	6	6	2	4
James	R_2f2piXUBBflYdHz	E	4	8	5	5	6	3	5	Strongly	Strongly	Very Strongly	Slightly	Moderately	Quite a bit	Very slightly or not at all	Moderately	Very slightly or not at all	Very slightly or not at all	A little	Very slightly or not at all	Very slightly or not at all	Very slightly or not at all	Moderately	A little	Very slightly or not at all	Moderately	Very slightly or not at all	A little	Very slightly or not at all	Very slightly or not at all	A little	Very slightly or not at all	A little	Very slightly or not at all	A little		4	2	3	0	5	4	9	6	12	50	65	40
None	R_9L9HW0A8O8IfoBP									Very Strongly	Very Strongly	Very Strongly	Strongly	Moderately	Quite a bit	Very slightly or not at all	Quite a bit	Very slightly or not at all	Very slightly or not at all	A little	Very slightly or not at all	Very slightly or not at all	Very slightly or not at all	Quite a bit	A little	Very slightly or not at all	Quite a bit	Very slightly or not at all	Quite a bit	Very slightly or not at all	Quite a bit	Quite a bit	Very slightly or not at all	A little	Very slightly or not at all	Moderately		7	1	7	1	6	6	7	3	12
Steve	R_tLjdG6LOTCig8zn	B	5	7	5	9	9	7	5	Strongly	Strongly	Strongly	Moderately	Strongly	Quite a bit	Very slightly or not at all	Moderately	A little	Very slightly or not at all	Moderately	Very slightly or not at all	Very slightly or not at all	Very slightly or not at all	Moderately	Moderately	Very slightly or not at all	Quite a bit	Very slightly or not at all	Moderately	Very slightly or not at all	Very slightly or not at all	Quite a bit	A little	Moderately	Very slightly or not at all	Moderately		7	0	5	0	10	9	10	5	18
None	R_1cU0u1OYrgjQZse									Very Strongly	Very Strongly	Very Strongly	Strongly	Strongly	Extremely	Very slightly or not at all	Extremely	Very slightly or not at all	Very slightly or not at all	Very slightly or not at all	Very slightly or not at all	Very slightly or not at all	Very slightly or not at all	Extremely	Very slightly or not at all	Very slightly or not at all	Quite a bit	Very slightly or not at all	Moderately	Very slightly or not at all	Very slightly or not at all	Quite a bit	Very slightly or not at all	Quite a bit	Very slightly or not at all	Very slightly or not at all		5	0	5	0	1	1	1	10	15
Steve	R_3EcnNt1NHaqbC0p	B	5	7	7	7	7	7	8	Strongly	Strongly	Strongly	Strongly	Strongly	Quite a bit	Very slightly or not at all	Moderately	Quite a bit	Very slightly or not at all	Very slightly or not at all	Very slightly or not at all	Very slightly or not at all	Very slightly or not at all	Very slightly or not at all	Very slightly or not at all	Very slightly or not at all	A little	Very slightly or not at all	A little	Very slightly or not at all	Very slightly or not at all	Very slightly or not at all	Very slightly or not at all	Very slightly or not at all	Very slightly or not at all	Very slightly or not at all		6	5	6	6	7	7	6	4	15
James	wefrsfasdrtgert	E	9	9	9	9	Very Much (10)	Very Much (10)	Very Much (10)	Very Strongly	Very Strongly	Very Strongly	Very Strongly	Very Strongly	Extremely	Extremely	Extremely	Extremely	Extremely	Extremely	Extremely	Extremely	Extremely	Extremely	Extremely	Extremely	Extremely	Extremely	Extremely	Extremely	Extremely	Extremely	Extremely	Extremely	Extremely	Extremely
Steve	sgsdfgsdfg	F	Very Much (10)	Very Much (10)	Very Much (10)	Very Much (10)	Very Much (10)	Very Much (10)	Very Much (10)	Very Strongly	Very Strongly	Very Strongly	Very Strongly	Very Strongly	Extremely	Extremely	Extremely	Extremely	Extremely	Extremely	Extremely	Extremely	Extremely	Extremely	Extremely	Extremely	Extremely	Extremely	Extremely	Extremely	Extremely	Extremely	Extremely	Extremely	Extremely	Extremely		7	7	7	7	6	6	6
Steve	dghdfghdfg	E	9	9	9	9	9	9	9	Very Strongly	Very Strongly	Very Strongly	Very Strongly	Very Strongly	Extremely	Extremely	Extremely	Extremely	Extremely	Extremely	Extremely	Extremely	Extremely	Extremely	Extremely	Extremely	Extremely	Extremely	Extremely	Extremely	Extremely	Extremely	Extremely	Extremely	Extremely	Extremely		7	7	7	6	6	6	6
Steve	ertgseargerg	F	Very Much (10)	Very Much (10)	Very Much (10)	Very Much (10)	Very Much (10)	Very Much (10)	Very Much (10)	Very Strongly	Very Strongly	Very Strongly	Very Strongly	Very Strongly	Extremely	Extremely	Extremely	Extremely	Extremely	Extremely	Extremely	Extremely	Extremely	Extremely	Extremely	Extremely	Extremely	Extremely	Extremely	Extremely	Extremely	Extremely	Extremely	Extremely	Extremely	Extremely
None	R_1hSB3c0tvWvXS6F									Moderately	Moderately	Strongly	Slightly	Not at all	Extremely	Very slightly or not at all	Quite a bit	Moderately	Very slightly or not at all	A little	Very slightly or not at all	Very slightly or not at all	Very slightly or not at all	Quite a bit	Moderately	Very slightly or not at all	Quite a bit	Very slightly or not at all	Quite a bit	Very slightly or not at all	Quite a bit	Quite a bit	Moderately	Extremely	Very slightly or not at all	Moderately		3	1	5	4	5	4	4	8	15
James	R_3kNRBOVNGv7xTkn	E	4	2	4	5	4	1	4	Moderately	Strongly	Strongly	Moderately	Slightly	Quite a bit	Very slightly or not at all	Quite a bit	Moderately	Very slightly or not at all	Moderately	Very slightly or not at all	Very slightly or not at all	Very slightly or not at all	Quite a bit	Moderately	A little	Quite a bit	Very slightly or not at all	Moderately	Very slightly or not at all	Moderately	Moderately	Very slightly or not at all	Moderately	Very slightly or not at all	A little		6	2	4	2	6	4	4	10	15
Steve	R_6ogQhinNMWyMi8V	B	Not at all (0)	4	5	8	7	4	3	Moderately	Strongly	Strongly	Moderately	Moderately	Quite a bit	Very slightly or not at all	Moderately	Moderately	Very slightly or not at all	A little	Very slightly or not at all	Very slightly or not at all	Very slightly or not at all	Moderately	A little	A little	Extremely	Very slightly or not at all	Quite a bit	A little	A little	Extremely	A little	Moderately	Very slightly or not at all	Moderately		3	3	3	3	6	6	7	5	15
None	R_29soKcCQ1lHWQXk									Very Strongly	Very Strongly	Very Strongly	Very Strongly	Strongly	A little	Very slightly or not at all	A little	Very slightly or not at all	Very slightly or not at all	Very slightly or not at all	Very slightly or not at all	Very slightly or not at all	Very slightly or not at all	Very slightly or not at all	Very slightly or not at all	Very slightly or not at all	Very slightly or not at all	Very slightly or not at all	Very slightly or not at all	Very slightly or not at all	Very slightly or not at all	Very slightly or not at all	Very slightly or not at all	Very slightly or not at all	Very slightly or not at all	Very slightly or not at all		0	0	0	0	7	3	7	10	15
Steve	R_1JF57Pt6KpQ3J0n	D	4	3	6	6	7	3	4	Moderately	Strongly	Strongly	Not at all	Moderately	Quite a bit	Very slightly or not at all	Moderately	Very slightly or not at all	Very slightly or not at all	Moderately	Very slightly or not at all	Very slightly or not at all	Very slightly or not at all	Very slightly or not at all	Very slightly or not at all	Very slightly or not at all	A little	Very slightly or not at all	A little	A little	Very slightly or not at all	A little	Very slightly or not at all	Very slightly or not at all	Very slightly or not at all	Quite a bit		6	0	4	0	7	6	6	4	12
None	R_UbgQ4VEK9hZMSgF									Strongly	Strongly	Strongly	Moderately	Moderately	Quite a bit	Very slightly or not at all	A little	Very slightly or not at all	Very slightly or not at all	Very slightly or not at all	Very slightly or not at all	Very slightly or not at all	Very slightly or not at all	Very slightly or not at all	Very slightly or not at all	A little	A little	Very slightly or not at all	Very slightly or not at all	Very slightly or not at all	Very slightly or not at all	Moderately	A little	Very slightly or not at all	Very slightly or not at all	Very slightly or not at all		7	0	6	1	2	3	4	4	15
James	Katie Test Game Theory Games	E	7	7	7	7	7	7	8	Strongly	Strongly	Strongly	Strongly	Strongly	Quite a bit	Quite a bit	Quite a bit	Quite a bit	Quite a bit	Quite a bit	Quite a bit	Quite a bit	Quite a bit	Quite a bit	Quite a bit	Quite a bit	Quite a bit	Quite a bit	Quite a bit	Quite a bit	Quite a bit	Quite a bit	Quite a bit	Quite a bit	Quite a bit	Quite a bit		5	0	5	0	4	4	4	8	15
James	Unknown1	B	2	4	2	4	3	3	2	Slightly	Slightly	Moderately	Moderately	Slightly	Moderately	Very slightly or not at all	A little	Very slightly or not at all	Very slightly or not at all	A little	Very slightly or not at all	Very slightly or not at all	Very slightly or not at all	Moderately	Very slightly or not at all	Very slightly or not at all	A little	Very slightly or not at all	A little	Very slightly or not at all	A little	Moderately	A little	A little	Very slightly or not at all	Very slightly or not at all		1	0	1	0	7	6	7	10	15	61	61	61
Steve	Unknown2	E	8	3	7	7	8	Not at all (0)	7	Moderately	Strongly	Moderately	Moderately	Moderately	A little	Very slightly or not at all	Very slightly or not at all	Very slightly or not at all	Very slightly or not at all	Moderately	Very slightly or not at all	Very slightly or not at all	Very slightly or not at all	Moderately	Very slightly or not at all	Very slightly or not at all	Quite a bit	Very slightly or not at all	Very slightly or not at all	Very slightly or not at all	A little	Quite a bit	Very slightly or not at all	Moderately	Very slightly or not at all	Moderately		5	0	2	0	8	7	8	6	15
James	R_1gBK5BH9appPQda	E	4	9	4	4	Very Much (10)	4	4	Moderately	Strongly	Strongly	Moderately	Very Strongly	Extremely	Very slightly or not at all	Quite a bit	Extremely	Very slightly or not at all	Extremely	Very slightly or not at all	Very slightly or not at all	Very slightly or not at all	Moderately	Moderately	Very slightly or not at all	Extremely	Very slightly or not at all	Quite a bit	Very slightly or not at all	Moderately	Quite a bit	Very slightly or not at all	Extremely	Very slightly or not at all	Very slightly or not at all		7	0	1	0	9	8	9	2	15	90	90	50
None	R_sAMM2IfScVEnCtb									Moderately	Strongly	Strongly	Strongly	Slightly	A little	Very slightly or not at all	Very slightly or not at all	Very slightly or not at all	Very slightly or not at all	Very slightly or not at all	Very slightly or not at all	Very slightly or not at all	Very slightly or not at all	Very slightly or not at all	Very slightly or not at all	Very slightly or not at all	A little	Very slightly or not at all	A little	Very slightly or not at all	Very slightly or not at all	A little	Very slightly or not at all	A little	Very slightly or not at all	Very slightly or not at all		0	0	0	0	2	2	2	5	15
James	R_cOMzJXmO1Nd3gC5	B	3	7	4	7	8	7	2	Strongly	Strongly	Strongly	Slightly	Moderately	Quite a bit	Moderately	Quite a bit	Moderately	A little	Quite a bit	Very slightly or not at all	Moderately	A little	A little	Moderately	Moderately	Moderately	A little	Moderately	Quite a bit	Quite a bit	Moderately	A little	Quite a bit	Moderately	Quite a bit		6	4	7	3	6	8	8	7	15
None	R_O8e63FbsRh7sAW5									Moderately	Moderately	Moderately	Slightly	Slightly	Quite a bit	Moderately	A little	Very slightly or not at all	Very slightly or not at all	Very slightly or not at all	Very slightly or not at all	Very slightly or not at all	Very slightly or not at all	Very slightly or not at all	Very slightly or not at all	Very slightly or not at all	Very slightly or not at all	Very slightly or not at all	A little	Very slightly or not at all	Very slightly or not at all	Moderately	A little	Very slightly or not at all	Very slightly or not at all	Very slightly or not at all		6	0	5	3	3	4	4	3	15
Steve	R_2ammP9yoJrRgnU2	B	6	5	6	8	6	6	3	Moderately	Moderately	Moderately	Moderately	Moderately	Moderately	Very slightly or not at all	A little	A little	Very slightly or not at all	Very slightly or not at all	Very slightly or not at all	Very slightly or not at all	Very slightly or not at all	A little	A little	Moderately	Moderately	A little	Very slightly or not at all	A little	Very slightly or not at all	Quite a bit	A little	Moderately	Very slightly or not at all	Very slightly or not at all		7	4	7	5	7	7	7	5	15
Steve	R_p3CU0hHHTluZCxz	C	3	7	6	7	5	4	3	Moderately	Moderately	Strongly	Moderately	Slightly	Quite a bit	Very slightly or not at all	Moderately	Very slightly or not at all	Very slightly or not at all	Very slightly or not at all	Very slightly or not at all	Very slightly or not at all	Very slightly or not at all	A little	A little	A little	Quite a bit	Very slightly or not at all	A little	A little	A little	Quite a bit	Moderately	A little	Very slightly or not at all	A little		5	0	4	0	7	6	6	2	10
James	R_vGZiSUZHFEyHjz3	F	8	8	8	8	8	8	8	Strongly	Very Strongly	Strongly	Very Strongly	Strongly	Extremely	Very slightly or not at all	Quite a bit	Very slightly or not at all	Very slightly or not at all	Quite a bit	Very slightly or not at all	Very slightly or not at all	Very slightly or not at all	Extremely	Moderately	Very slightly or not at all	Extremely	Very slightly or not at all	Extremely	Very slightly or not at all	Quite a bit	Quite a bit	Very slightly or not at all	Quite a bit	Very slightly or not at all	Moderately		8	0	8	0	7	7	7	4	15	90	91	90
None	R_ZErIpxPf45hIcHD									Very Strongly	Very Strongly	Very Strongly	Strongly	Not at all	A little	Very slightly or not at all	A little	Very slightly or not at all	Very slightly or not at all	Very slightly or not at all	Very slightly or not at all	Very slightly or not at all	Very slightly or not at all	Very slightly or not at all	Very slightly or not at all	Very slightly or not at all	Moderately	Very slightly or not at all	A little	A little	Very slightly or not at all	Moderately	Very slightly or not at all	A little	Very slightly or not at all	Moderately		2	0	2	0	0	1	1	3	10
Steve	R_25KI1oQ6Of4pmw2	C	7	8	8	8	7	6	7	Strongly	Strongly	Moderately	Moderately	Moderately	Extremely	Very slightly or not at all	Quite a bit	Moderately	Very slightly or not at all	Moderately	Very slightly or not at all	Very slightly or not at all	Very slightly or not at all	Quite a bit	A little	Very slightly or not at all	Quite a bit	Very slightly or not at all	Quite a bit	A little	Quite a bit	Quite a bit	Moderately	Quite a bit	Very slightly or not at all	Very slightly or not at all		5	0	0	0	7	6	8	6	15
James	R_2q7yjET9oyvAqPu	D	4	6	3	8	8	7	3	Strongly	Strongly	Strongly	Slightly	Moderately	Quite a bit	Very slightly or not at all	A little	A little	Very slightly or not at all	Moderately	Very slightly or not at all	Very slightly or not at all	Very slightly or not at all	A little	A little	A little	Moderately	Very slightly or not at all	Moderately	Very slightly or not at all	A little	Moderately	Very slightly or not at all	A little	Very slightly or not at all	Quite a bit		6	2	2	2	7	7	7	5	15	77	86	80
None	R_2PnYlvqi6my1tjz									Strongly	Strongly	Moderately	Moderately	Strongly	Quite a bit	A little	Moderately	A little	A little	Moderately	A little	Very slightly or not at all	Very slightly or not at all	Moderately	Moderately	Very slightly or not at all	Moderately	A little	Quite a bit	Very slightly or not at all	Moderately	Moderately	A little	Moderately	Very slightly or not at all	A little		2	0	2	0	5	5	5	5	15
James	R_20NZuJI0WXSMlao	E	8	2	4	9	3	5	7	Moderately	Strongly	Very Strongly	Moderately	Slightly	Moderately	Very slightly or not at all	Very slightly or not at all	Moderately	Very slightly or not at all	Moderately	Very slightly or not at all	Very slightly or not at all	Very slightly or not at all	Very slightly or not at all	Moderately	Very slightly or not at all	A little	Very slightly or not at all	Very slightly or not at all	Very slightly or not at all	Extremely	Very slightly or not at all	Moderately	Moderately	Very slightly or not at all	Very slightly or not at all		6	0	6	0	2	2	2	10	15	52	49	52
James	R_2y89OLPsMtTwY6v	B	1	5	4	4	8	4	2	Strongly	Strongly	Strongly	Strongly	Moderately	Moderately	Very slightly or not at all	Moderately	Very slightly or not at all	Very slightly or not at all	Moderately	Very slightly or not at all	Very slightly or not at all	Very slightly or not at all	A little	Moderately	Very slightly or not at all	A little	Very slightly or not at all	Very slightly or not at all	Very slightly or not at all	Very slightly or not at all	Quite a bit	A little	A little	Very slightly or not at all	Moderately		3	0	3	0	7	6	7	10	15	50	40	20
James	R_BFaqWxVaDJ9dNKx	B	6	3	3	9	7	Very Much (10)	4	Moderately	Strongly	Strongly	Not at all	Moderately	A little	A little	Moderately	Very slightly or not at all	A little	Moderately	Very slightly or not at all	Very slightly or not at all	Very slightly or not at all	A little	A little	Very slightly or not at all	Moderately	Very slightly or not at all	Very slightly or not at all	Very slightly or not at all	Very slightly or not at all	Very slightly or not at all	Very slightly or not at all	Very slightly or not at all	Very slightly or not at all	Quite a bit		2	0	3	0	1	1	1	7	15
Steve	R_UuLMuNY3ELzEWfT	C	1	4	4	4	7	4	1	Slightly	Strongly	Moderately	Strongly	Strongly	Quite a bit	Moderately	Moderately	Quite a bit	Quite a bit	Quite a bit	Quite a bit	Moderately	A little	Very slightly or not at all	Very slightly or not at all	A little	Quite a bit	Moderately	Very slightly or not at all	A little	Moderately	Moderately	Moderately	Moderately	Quite a bit	A little		6	1	1	5	6	6	8	10	15
None	R_3D0fvESd6LYsA8S									Strongly	Strongly	Not at all	Very Strongly	Strongly	Extremely	Very slightly or not at all	A little	Very slightly or not at all	Very slightly or not at all	Very slightly or not at all	Very slightly or not at all	Very slightly or not at all	Very slightly or not at all	Quite a bit	A little	Very slightly or not at all	Quite a bit	Very slightly or not at all	Moderately	Very slightly or not at all	Very slightly or not at all	Quite a bit	Moderately	A little	Very slightly or not at all	Quite a bit		0	0	0	0	0	0	0	5	15
Steve	R_1j9UkkzEQiakALK	D	4	5	4	7	6	5	4	Strongly	Strongly	Strongly	Strongly	Very Strongly	Quite a bit	Very slightly or not at all	Moderately	Moderately	Very slightly or not at all	A little	Very slightly or not at all	Very slightly or not at all	Very slightly or not at all	A little	Very slightly or not at all	Very slightly or not at all	Quite a bit	Very slightly or not at all	Very slightly or not at all	Very slightly or not at all	Very slightly or not at all	Moderately	A little	Very slightly or not at all	Very slightly or not at all	A little		4	0	4	0	6	7	8	7	20
Steve	sdfsadfsa	E	Very Much (10)	Very Much (10)	Very Much (10)	Very Much (10)	Very Much (10)	Very Much (10)	Very Much (10)	Very Strongly	Very Strongly	Very Strongly	Very Strongly	Very Strongly	Extremely	Extremely	Extremely	Extremely	Extremely	Extremely	Extremely	Extremely	Extremely	Extremely	Extremely	Extremely	Extremely	Extremely	Extremely	Extremely	Extremely	Extremely	Extremely	Extremely	Extremely	Extremely
James	R_wSmATAfilRuLOet	C	2	5	2	7	5	4	3	Moderately	Strongly	Moderately	Slightly	Moderately	Quite a bit	Very slightly or not at all	Moderately	Moderately	Very slightly or not at all	A little	Very slightly or not at all	Very slightly or not at all	Very slightly or not at all	A little	A little	Very slightly or not at all	Moderately	Very slightly or not at all	Moderately	A little	Very slightly or not at all	Quite a bit	Very slightly or not at all	Moderately	Very slightly or not at all	Very slightly or not at all		5	2	2	2	7	7	8	5	14	81	81	59
None	R_3KGChv3UPpNIqHp									Strongly	Strongly	Strongly	Moderately	Slightly	A little	Very slightly or not at all	Moderately	Very slightly or not at all	Very slightly or not at all	Very slightly or not at all	Very slightly or not at all	Very slightly or not at all	Very slightly or not at all	Very slightly or not at all	Very slightly or not at all	Very slightly or not at all	Quite a bit	Very slightly or not at all	Very slightly or not at all	Quite a bit	Very slightly or not at all	Quite a bit	Very slightly or not at all	Quite a bit	Very slightly or not at all	Very slightly or not at all		6	0	0	2	7	2	7	5	10
None	R_1FFKetjiKqIHnHU									Slightly	Strongly	Slightly	Not at all	Slightly	A little	A little	Very slightly or not at all	Very slightly or not at all	Very slightly or not at all	A little	Very slightly or not at all	Very slightly or not at all	Very slightly or not at all	Moderately	Moderately	A little	Moderately	A little	A little	A little	Moderately	A little	Moderately	Moderately	A little	Moderately		3	0	4	0	5	5	5	4	10
Steve	R_1mkofeFPvjEejGJ	B	6	6	6	5	5	6	6	Strongly	Strongly	Strongly	Moderately	Strongly	Extremely	Quite a bit	Extremely	Quite a bit	Moderately	Quite a bit	Very slightly or not at all	A little	Very slightly or not at all	Quite a bit	A little	A little	A little	Very slightly or not at all	Quite a bit	A little	Moderately	A little	Very slightly or not at all	Moderately	Very slightly or not at all	Quite a bit		4	0	4	5	5	5	5	0	0
Steve	R_1gpBsY4LEBx17DE	A	3	4	4	5	6	3	2	Strongly	Strongly	Moderately	Moderately	Moderately	Moderately	Very slightly or not at all	Very slightly or not at all	Very slightly or not at all	Very slightly or not at all	Very slightly or not at all	Very slightly or not at all	Very slightly or not at all	Very slightly or not at all	A little	A little	Very slightly or not at all	Moderately	Very slightly or not at all	Very slightly or not at all	Very slightly or not at all	Very slightly or not at all	Moderately	Very slightly or not at all	Moderately	Very slightly or not at all	Quite a bit		2	0	2	0	3	4	4	0	10
None	R_WoBdrmUMFfw3oQh									Strongly	Moderately	Strongly	Moderately	Strongly	Quite a bit	Very slightly or not at all	Quite a bit	Very slightly or not at all	Very slightly or not at all	Very slightly or not at all	Very slightly or not at all	Very slightly or not at all	Very slightly or not at all	Moderately	A little	Very slightly or not at all	A little	Very slightly or not at all	Moderately	Very slightly or not at all	A little	Moderately	Very slightly or not at all	A little	Very slightly or not at all	Very slightly or not at all		2	0	1	0	5	3	3	8	8
Steve	R_1l641sAnHzAqVS3	G	9	9	9	9	Very Much (10)	7	9	Strongly	Very Strongly	Strongly	Strongly	Moderately	Quite a bit	Very slightly or not at all	Quite a bit	A little	Very slightly or not at all	Moderately	Very slightly or not at all	Very slightly or not at all	Very slightly or not at all	Quite a bit	Moderately	Very slightly or not at all	Moderately	Very slightly or not at all	Moderately	Very slightly or not at all	A little	Moderately	Moderately	Moderately	Very slightly or not at all	A little		5	2	5	4	5	5	5	5	15
Steve	R_2A0Z5gB1XgQ7OVz	E	6	6	6	8	7	8	6	Strongly	Very Strongly	Very Strongly	Strongly	Strongly	Quite a bit	A little	Moderately	Moderately	Very slightly or not at all	Moderately	Very slightly or not at all	Very slightly or not at all	Very slightly or not at all	Quite a bit	Quite a bit	Very slightly or not at all	Quite a bit	Very slightly or not at all	Moderately	A little	A little	Quite a bit	Quite a bit	Quite a bit	Very slightly or not at all	Moderately		3	1	1	0	5	5	6	10	15
None	R_PuN8nZdls2YYL61									Moderately	Very Strongly	Moderately	Strongly	Slightly	Quite a bit	Very slightly or not at all	Quite a bit	Very slightly or not at all	Very slightly or not at all	Moderately	Very slightly or not at all	Very slightly or not at all	Very slightly or not at all	Quite a bit	A little	A little	Quite a bit	Very slightly or not at all	Moderately	Very slightly or not at all	A little	Quite a bit	A little	Moderately	Very slightly or not at all	Very slightly or not at all		8	7	6	5	6	4	7	10	15
None	R_1Krna2FaNfSGDSY									Moderately	Strongly	Strongly	Slightly	Strongly	Quite a bit	Very slightly or not at all	Quite a bit	Very slightly or not at all	Very slightly or not at all	A little	Moderately	Moderately	A little	Quite a bit	A little	Very slightly or not at all	A little	Moderately	Moderately	Moderately	Moderately	A little	Very slightly or not at all	Moderately	A little	Very slightly or not at all		7	3	7	2	8	7	8	10	15
James	R_2CTiRmewXTeUW9J	D	2	3	2	3	4	3	2	Moderately	Strongly	Strongly	Strongly	Slightly	Quite a bit	Very slightly or not at all	A little	A little	Very slightly or not at all	Very slightly or not at all	Very slightly or not at all	Very slightly or not at all	Very slightly or not at all	Very slightly or not at all	Very slightly or not at all	Very slightly or not at all	A little	Very slightly or not at all	Very slightly or not at all	A little	Very slightly or not at all	Very slightly or not at all	A little	Very slightly or not at all	Very slightly or not at all	A little		3	5	1	0	0	0	0	5	5	51	51	32
Steve	123456	C
None	R_TtkowkBk77RTCdr									Strongly	Strongly	Very Strongly	Strongly	Moderately	Extremely	Very slightly or not at all	Quite a bit	Very slightly or not at all	Very slightly or not at all	Very slightly or not at all	Very slightly or not at all	A little	Very slightly or not at all	Quite a bit	Quite a bit	Very slightly or not at all	Moderately	Very slightly or not at all	Quite a bit	A little	Quite a bit	Moderately	A little	Quite a bit	A little	Moderately		9	6	8	6	8	10	6	4	12
None	R_1QlPW43jjaFm6EM									Strongly	Strongly	Strongly	Moderately	Strongly	Extremely	Very slightly or not at all	Quite a bit	Very slightly or not at all	Very slightly or not at all	Moderately	Very slightly or not at all	A little	Very slightly or not at all	Quite a bit	A little	Very slightly or not at all	Quite a bit	Very slightly or not at all	Moderately	A little	A little	Quite a bit	A little	Moderately	Very slightly or not at all	Quite a bit		8	0	7	4	6	5	6	6	15
Steve	R_3EGYUqdLEEoaUxo	D	Not at all (0)	3	4	4	6	4	3	Moderately	Strongly	Moderately	Moderately	Moderately	Quite a bit	Very slightly or not at all	Moderately	Moderately	Very slightly or not at all	Quite a bit	Very slightly or not at all	Very slightly or not at all	Very slightly or not at all	Quite a bit	Moderately	Very slightly or not at all	Quite a bit	Very slightly or not at all	Moderately	A little	Quite a bit	Quite a bit	Moderately	Quite a bit	Very slightly or not at all	Very slightly or not at all		6	0	5	0	6	6	6	10	15
James	R_3nc3jmxNveNeeQh	B	1	Not at all (0)	2	4	7	2	1	Moderately	Strongly	Strongly	Moderately	Slightly	Quite a bit	Very slightly or not at all	Quite a bit	Very slightly or not at all	Very slightly or not at all	A little	Very slightly or not at all	Very slightly or not at all	Very slightly or not at all	Quite a bit	A little	Very slightly or not at all	Quite a bit	Very slightly or not at all	Moderately	Very slightly or not at all	A little	Quite a bit	A little	A little	Very slightly or not at all	Quite a bit		2	0	2	0	1	1	1	5	0	40	50	40
Steve	R_shPplcAOL7fhyPD	D	4	5	3	2	5	4	4	Strongly	Strongly	Strongly	Moderately	Strongly	Moderately	Very slightly or not at all	Very slightly or not at all	A little	Very slightly or not at all	A little	Very slightly or not at all	Very slightly or not at all	Very slightly or not at all	A little	Very slightly or not at all	Very slightly or not at all	Very slightly or not at all	Very slightly or not at all	Very slightly or not at all	Very slightly or not at all	Very slightly or not at all	Quite a bit	Very slightly or not at all	Very slightly or not at all	Very slightly or not at all	Very slightly or not at all		4	2	5	0	3	1	1	7	15
Steve	R_2ZWAFZXHiTKMG5D	E	7	3	5	7	6	6	5	Moderately	Strongly	Strongly	Moderately	Moderately	Quite a bit	Very slightly or not at all	Moderately	Very slightly or not at all	Very slightly or not at all	A little	Very slightly or not at all	Very slightly or not at all	Very slightly or not at all	Moderately	A little	Very slightly or not at all	Quite a bit	Very slightly or not at all	Very slightly or not at all	Very slightly or not at all	Very slightly or not at all	Moderately	Very slightly or not at all	Moderately	Very slightly or not at all	Very slightly or not at all		2	1	2	1	8	7	8	2	10
James	R_xxfsmSfglC3EZVv	D	2	4	3	6	3	4	3	Slightly	Moderately	Moderately	Slightly	Slightly	Moderately	Very slightly or not at all	A little	Very slightly or not at all	Very slightly or not at all	A little	Very slightly or not at all	Very slightly or not at all	Very slightly or not at all	A little	A little	Very slightly or not at all	Quite a bit	Very slightly or not at all	Very slightly or not at all	Very slightly or not at all	Very slightly or not at all	Moderately	A little	A little	Very slightly or not at all	Moderately		5	0	3	0	6	6	6	6	15
James	R_2dLztQh65IOz688	D	3	8	5	9	7	2	4	Strongly	Moderately	Moderately	Strongly	Moderately	Extremely	Very slightly or not at all	Quite a bit	Very slightly or not at all	Very slightly or not at all	Moderately	Very slightly or not at all	Very slightly or not at all	Very slightly or not at all	Quite a bit	A little	Very slightly or not at all	Moderately	Very slightly or not at all	A little	Very slightly or not at all	A little	Moderately	Very slightly or not at all	A little	Very slightly or not at all	Very slightly or not at all		1	0	1	0	5	3	7	7	12	50	60	35
James	R_Xk7bToHAEmSz8Qh	C	5	7	6	7	7	7	5	Moderately	Slightly	Moderately	Moderately	Strongly	Quite a bit	Very slightly or not at all	A little	Moderately	A little	A little	Very slightly or not at all	Very slightly or not at all	Very slightly or not at all	Moderately	Very slightly or not at all	Very slightly or not at all	Moderately	Very slightly or not at all	A little	A little	Moderately	Moderately	Very slightly or not at all	Moderately	A little	Very slightly or not at all		6	0	2	0	7	7	8	10	15
James	R_2cpWM3XrbHPtkJv	G	2	8	7	9	Very Much (10)	Very Much (10)	8	Strongly	Very Strongly	Strongly	Strongly	Strongly	Extremely	Very slightly or not at all	Moderately	Very slightly or not at all	Very slightly or not at all	Moderately	Very slightly or not at all	Very slightly or not at all	Very slightly or not at all	Moderately	A little	Very slightly or not at all	Moderately	Very slightly or not at all	A little	Very slightly or not at all	A little	Quite a bit	Very slightly or not at all	Quite a bit	Very slightly or not at all	Quite a bit		1	0	0	0	9	9	9	5	10
James	R_24eNqBp2RycoPqP	B	1	3	2	4	5	5	1	Moderately	Moderately	Moderately	Moderately	Slightly	Quite a bit	Very slightly or not at all	Moderately	A little	Very slightly or not at all	Very slightly or not at all	Very slightly or not at all	Very slightly or not at all	Very slightly or not at all	A little	A little	Very slightly or not at all	Quite a bit	Very slightly or not at all	Very slightly or not at all	Very slightly or not at all	Very slightly or not at all	A little	Moderately	Moderately	Very slightly or not at all	A little		0	0	0	0	2	2	4	6	15	34	65	22
James	R_VW6iD1JhOxFQ7e1	F	5	Not at all (0)	6	5	6	2	5	Strongly	Very Strongly	Strongly	Slightly	Moderately	Quite a bit	Very slightly or not at all	A little	Moderately	Very slightly or not at all	A little	Very slightly or not at all	Very slightly or not at all	Very slightly or not at all	Moderately	A little	Very slightly or not at all	Quite a bit	Very slightly or not at all	A little	Very slightly or not at all	A little	Moderately	Very slightly or not at all	A little	Very slightly or not at all	Very slightly or not at all		3	0	1	0	6	6	6	10	15	57	58	53
Steve	R_vepL2uaV4fFOoyl	B	1	2	3	4	5	4	2	Strongly	Moderately	Strongly	Moderately	Slightly	Moderately	Very slightly or not at all	A little	Very slightly or not at all	Very slightly or not at all	Very slightly or not at all	Very slightly or not at all	Very slightly or not at all	Very slightly or not at all	Moderately	A little	Very slightly or not at all	Very slightly or not at all	Very slightly or not at all	A little	Very slightly or not at all	Moderately	Quite a bit	Moderately	A little	Very slightly or not at all	Quite a bit		4	0	4	4	6	7	6	4	30
None	R_Oa34lataLl72zKx									Moderately	Strongly	Slightly	Moderately	Moderately	Very slightly or not at all	Very slightly or not at all	Very slightly or not at all	Very slightly or not at all	Very slightly or not at all	Very slightly or not at all	Very slightly or not at all	Very slightly or not at all	Very slightly or not at all	Very slightly or not at all	Very slightly or not at all	Very slightly or not at all	Moderately	Very slightly or not at all	Very slightly or not at all	Very slightly or not at all	Very slightly or not at all	Moderately	Very slightly or not at all	Very slightly or not at all	Very slightly or not at all	Very slightly or not at all		4	0	3	0	6	5	5	3	10
James	R_szJwQmxh5szzza1	B	3	3	3	3	4	5	4	Moderately	Moderately	Moderately	Moderately	Moderately	Quite a bit	Very slightly or not at all	Moderately	Moderately	Very slightly or not at all	A little	Very slightly or not at all	Very slightly or not at all	Very slightly or not at all	A little	A little	A little	A little	Very slightly or not at all	Moderately	A little	A little	A little	Very slightly or not at all	A little	Very slightly or not at all	Moderately		4	3	3	3	7	6	7	2	15
Steve	R_9vgFSpHDW5oHMcx	C	1	2	4	3	6	6	2	Moderately	Very Strongly	Strongly	Moderately	Slightly	Moderately	Very slightly or not at all	A little	Quite a bit	Very slightly or not at all	Moderately	Very slightly or not at all	Very slightly or not at all	Very slightly or not at all	A little	Quite a bit	Very slightly or not at all	Moderately	Very slightly or not at all	Moderately	Very slightly or not at all	Quite a bit	Quite a bit	A little	Very slightly or not at all	Very slightly or not at all	Very slightly or not at all		4	0	5	0	6	6	7	4	12
None	R_3iQhrTFuENBeink									Moderately	Moderately	Moderately	Moderately	Slightly	Moderately	Very slightly or not at all	A little	A little	Very slightly or not at all	A little	Very slightly or not at all	Very slightly or not at all	Very slightly or not at all	Very slightly or not at all	Very slightly or not at all	Very slightly or not at all	Moderately	Very slightly or not at all	Very slightly or not at all	Very slightly or not at all	Very slightly or not at all	Moderately	Very slightly or not at all	Moderately	Very slightly or not at all	Very slightly or not at all		0	0	0	0	6	0	7	1	5
James	R_3f0QazZAR5NmtZn	E	6	8	7	7	Very Much (10)	8	7	Strongly	Strongly	Strongly	Moderately	Moderately	Quite a bit	Moderately	Quite a bit	Moderately	A little	Quite a bit	Very slightly or not at all	Moderately	Very slightly or not at all	Moderately	Moderately	Very slightly or not at all	Quite a bit	A little	Moderately	Moderately	Moderately	Quite a bit	Quite a bit	Quite a bit	A little	Very slightly or not at all		6	4	6	5	7	8	9	10	15	75	79	64
None	R_2ziQnFPrOWqm3fm									Strongly	Moderately	Strongly	Very Strongly	Moderately	Quite a bit	Very slightly or not at all	Quite a bit	Very slightly or not at all	Very slightly or not at all	Moderately	Very slightly or not at all	Very slightly or not at all	Very slightly or not at all	Quite a bit	A little	Very slightly or not at all	Extremely	Very slightly or not at all	Quite a bit	A little	Quite a bit	Quite a bit	Very slightly or not at all	Moderately	Very slightly or not at all	Very slightly or not at all		9	1	8	0	10	10	10	10	15
Steve	R_3JlNTdafomti48q	D	7	9	8	Very Much (10)	8	8	8	Strongly	Strongly	Very Strongly	Very Strongly	Strongly	Quite a bit	Very slightly or not at all	Moderately	Very slightly or not at all	Very slightly or not at all	A little	Very slightly or not at all	Very slightly or not at all	Very slightly or not at all	Moderately	Moderately	Very slightly or not at all	Moderately	Very slightly or not at all	Quite a bit	Very slightly or not at all	A little	Moderately	Very slightly or not at all	Moderately	Very slightly or not at all	Quite a bit		4	4	3	4	7	6	7	3	13
None	R_2TTyN7TGDiOrgbK									Strongly	Strongly	Strongly	Strongly	Moderately	Quite a bit	Moderately	Moderately	A little	A little	A little	Very slightly or not at all	Very slightly or not at all	A little	Moderately	A little	A little	Moderately	Moderately	Moderately	Moderately	Moderately	Moderately	Moderately	Moderately	A little	A little		1	0	0	0	3	2	2	5	5
None	R_3KOOsgwJjER8r3f									Strongly	Moderately	Moderately	Strongly	Moderately	Moderately	Very slightly or not at all	A little	Very slightly or not at all	Very slightly or not at all	A little	Very slightly or not at all	Very slightly or not at all	Very slightly or not at all	Moderately	Very slightly or not at all	Very slightly or not at all	A little	Very slightly or not at all	A little	Very slightly or not at all	Very slightly or not at all	A little	A little	A little	Very slightly or not at all	Moderately		6	1	4	1	6	6	6	5	12
James	R_2WBiSqAt6b64lXf	E	6	3	7	7	6	7	5	Strongly	Strongly	Strongly	Moderately	Slightly	Quite a bit	A little	A little	Very slightly or not at all	Very slightly or not at all	A little	Very slightly or not at all	Very slightly or not at all	Very slightly or not at all	Moderately	Moderately	A little	Moderately	Very slightly or not at all	Moderately	A little	Moderately	Moderately	A little	A little	Very slightly or not at all	Quite a bit		4	2	4	2	8	8	7	8	15
Steve	R_ApnbgzdqvqyDAKR	E	6	3	8	9	8	7	4	Strongly	Very Strongly	Strongly	Moderately	Moderately	Quite a bit	Very slightly or not at all	A little	Very slightly or not at all	Very slightly or not at all	Very slightly or not at all	Very slightly or not at all	Very slightly or not at all	Very slightly or not at all	A little	Very slightly or not at all	Very slightly or not at all	Very slightly or not at all	Very slightly or not at all	Very slightly or not at all	Very slightly or not at all	Very slightly or not at all	Quite a bit	Very slightly or not at all	Moderately	Very slightly or not at all	Quite a bit		5	0	6	0	9	5	5	10	15
Steve	R_21oIWDE6fBJ8S85	E	3	4	6	6	6	6	6	Strongly	Moderately	Strongly	Slightly	Moderately	Quite a bit	Very slightly or not at all	Quite a bit	A little	Very slightly or not at all	Moderately	Very slightly or not at all	Very slightly or not at all	Very slightly or not at all	Quite a bit	Moderately	Very slightly or not at all	Extremely	Very slightly or not at all	Moderately	Very slightly or not at all	Moderately	Quite a bit	A little	Quite a bit	Very slightly or not at all	Very slightly or not at all		6	2	3	0	7	7	6	5	15
None	R_27CDYJxbevgrMjJ									Slightly	Slightly	Slightly	Not at all	Slightly	Very slightly or not at all	Very slightly or not at all	Moderately	Very slightly or not at all	Extremely	Extremely	Very slightly or not at all	Very slightly or not at all	Very slightly or not at all	Very slightly or not at all	Very slightly or not at all	Moderately	Very slightly or not at all	Very slightly or not at all	Very slightly or not at all	Very slightly or not at all	Very slightly or not at all	Very slightly or not at all	Very slightly or not at all	Very slightly or not at all	Very slightly or not at all	Very slightly or not at all		7	2	2	2	7	6	8	5	15
James	R_2Ynx89z5HvdaOSj	D	8	6	8	8	9	7	8	Strongly	Strongly	Strongly	Moderately	Strongly	Moderately	Very slightly or not at all	Moderately	Quite a bit	Very slightly or not at all	Quite a bit	A little	Very slightly or not at all	Very slightly or not at all	Quite a bit	Moderately	Very slightly or not at all	Moderately	Very slightly or not at all	Moderately	A little	Moderately	Moderately	A little	Quite a bit	Very slightly or not at all	Very slightly or not at all		7	2	8	1	8	7	8	10	15
None	R_3njiF9sXbI4Ty0w									Strongly	Strongly	Moderately	Moderately	Not at all	Moderately	Very slightly or not at all	Moderately	Very slightly or not at all	Very slightly or not at all	Very slightly or not at all	Very slightly or not at all	Very slightly or not at all	Very slightly or not at all	A little	Very slightly or not at all	Very slightly or not at all	Quite a bit	Very slightly or not at all	Very slightly or not at all	A little	Very slightly or not at all	Moderately	A little	Moderately	Very slightly or not at all	Very slightly or not at all		3	0	3	0	3	3	2	3	15
James	R_9RXRVR8MmsyZQhH	C	5	6	6	6	7	7	7	Strongly	Strongly	Strongly	Strongly	Strongly	Quite a bit	Very slightly or not at all	Quite a bit	Moderately	Very slightly or not at all	Moderately	Very slightly or not at all	Very slightly or not at all	Very slightly or not at all	Quite a bit	Moderately	Very slightly or not at all	A little	Very slightly or not at all	Moderately	Very slightly or not at all	Moderately	Moderately	Very slightly or not at all	Quite a bit	Very slightly or not at all	A little		2	0	0	1	4	3	2	0	0	50	51	50
James	R_3kdfg6lkcrzedDZ	D	7	6	9	Very Much (10)	7	8	7	Strongly	Strongly	Strongly	Moderately	Moderately	Extremely	Very slightly or not at all	Extremely	A little	Very slightly or not at all	A little	Very slightly or not at all	Very slightly or not at all	Very slightly or not at all	Extremely	Moderately	A little	Quite a bit	Very slightly or not at all	Moderately	A little	Moderately	Moderately	Quite a bit	Quite a bit	Very slightly or not at all	Very slightly or not at all		7	0	6	0	8	8	9	4	14
Steve	R_032W69C4pnog9IB	D	5	2	6	7	8	6	1	Moderately	Very Strongly	Strongly	Moderately	Strongly	Extremely	A little	A little	Moderately	Very slightly or not at all	Moderately	Quite a bit	A little	Very slightly or not at all	Moderately	Moderately	A little	Quite a bit	Quite a bit	Moderately	A little	Moderately	Moderately	Quite a bit	Moderately	A little	A little		7	0	6	0	7	6	6	10	15
Steve	R_1K8Uf5mNkW4yAqg	E	6	Very Much (10)	8	Very Much (10)	Very Much (10)	9	8	Strongly	Very Strongly	Strongly	Strongly	Very Strongly	Quite a bit	Very slightly or not at all	Moderately	Moderately	Very slightly or not at all	Quite a bit	A little	A little	Very slightly or not at all	Moderately	Moderately	Very slightly or not at all	Quite a bit	A little	Moderately	Very slightly or not at all	Moderately	Quite a bit	Very slightly or not at all	Moderately	Very slightly or not at all	Very slightly or not at all		6	0	7	1	10	8	9	10	15
James	R_1gi0kE0KTJYXylF	E	5	2	6	6	7	4	4	Very Strongly	Very Strongly	Very Strongly	Strongly	Moderately	Quite a bit	Very slightly or not at all	Quite a bit	A little	Very slightly or not at all	A little	Very slightly or not at all	Very slightly or not at all	Very slightly or not at all	Quite a bit	Very slightly or not at all	Very slightly or not at all	Very slightly or not at all	Very slightly or not at all	A little	Very slightly or not at all	Moderately	Moderately	Very slightly or not at all	A little	Very slightly or not at all	Moderately		4	1	4	1	6	6	7	10	15	70	71	72
None	R_3EiMcWq3kcnWy0H									Moderately	Very Strongly	Strongly	Moderately	Strongly	Extremely	Very slightly or not at all	Quite a bit	Very slightly or not at all	Very slightly or not at all	Moderately	Very slightly or not at all	Very slightly or not at all	Very slightly or not at all	Quite a bit	A little	Very slightly or not at all	Quite a bit	Very slightly or not at all	Quite a bit	A little	Moderately	Extremely	A little	A little	Very slightly or not at all	A little		6	3	7	2	3	2	7	6	15
None	R_1pyWwbBfD3S7Pne									Strongly	Very Strongly	Strongly	Moderately	Strongly	Quite a bit	Moderately	A little	Very slightly or not at all	A little	Very slightly or not at all	Very slightly or not at all	A little	Very slightly or not at all	Very slightly or not at all	Very slightly or not at all	Very slightly or not at all	Moderately	Very slightly or not at all	Very slightly or not at all	A little	Very slightly or not at all	Moderately	Very slightly or not at all	A little	Moderately	Very slightly or not at all		0	0	0	0	2	2	4	2	15
None	R_1mQL04yHKnYOOs8									Strongly	Strongly	Strongly	Strongly	Moderately	Quite a bit	Very slightly or not at all	Quite a bit	Moderately	Very slightly or not at all	Moderately	Very slightly or not at all	Very slightly or not at all	Very slightly or not at all	Quite a bit	Quite a bit	A little	Quite a bit	Very slightly or not at all	Quite a bit	Very slightly or not at all	Moderately	Moderately	Very slightly or not at all	Quite a bit	Very slightly or not at all	A little		7	1	7	2	4	6	6	5	20
Steve	R_2Y99YDf3G5EWjJh	A	2	1	3	3	8	7	2	Moderately	Strongly	Slightly	Slightly	Strongly	Quite a bit	Very slightly or not at all	Moderately	Moderately	Very slightly or not at all	A little	Very slightly or not at all	Very slightly or not at all	Very slightly or not at all	A little	Moderately	Very slightly or not at all	Quite a bit	Very slightly or not at all	Quite a bit	A little	Quite a bit	Quite a bit	A little	A little	Very slightly or not at all	Very slightly or not at all		2	0	2	2	6	7	7	10	10
None	R_2ctF8J3sAVLqxR2									Strongly	Strongly	Strongly	Strongly	Strongly	Quite a bit	Very slightly or not at all	Moderately	Extremely	Very slightly or not at all	Quite a bit	Very slightly or not at all	Very slightly or not at all	Very slightly or not at all	Moderately	Moderately	Very slightly or not at all	Quite a bit	Very slightly or not at all	Moderately	Very slightly or not at all	Quite a bit	Quite a bit	Very slightly or not at all	Moderately	Very slightly or not at all	Very slightly or not at all		2	2	2	2	6	6	5	8	15
Steve	R_3lEA7Dn0P8QgCv4	B	1	6	4	4	7	6	3	Strongly	Strongly	Strongly	Moderately	Moderately	Moderately	Very slightly or not at all	Moderately	Very slightly or not at all	Very slightly or not at all	Very slightly or not at all	A little	A little	Very slightly or not at all	A little	Very slightly or not at all	Very slightly or not at all	Moderately	Very slightly or not at all	Very slightly or not at all	Moderately	Very slightly or not at all	Very slightly or not at all	A little	Very slightly or not at all	Very slightly or not at all	Very slightly or not at all		1	6	0	6	0	2	0	0	0
James	R_YbsHTrHxqVaSaCB	B	2	4	6	6	5	4	4	Slightly	Strongly	Moderately	Moderately	Slightly	Quite a bit	Very slightly or not at all	Moderately	Very slightly or not at all	Very slightly or not at all	A little	Very slightly or not at all	Very slightly or not at all	Very slightly or not at all	Moderately	A little	Very slightly or not at all	Moderately	Very slightly or not at all	Moderately	Very slightly or not at all	Quite a bit	Moderately	A little	Moderately	Very slightly or not at all	Quite a bit		4	0	5	0	6	4	6	5	15
James	R_1mCP4H87jw9xIdx	A	5	3	4	5	4	5	2	Moderately	Slightly	Slightly	Slightly	Not at all	Quite a bit	A little	Moderately	Quite a bit	A little	Quite a bit	Very slightly or not at all	Very slightly or not at all	A little	A little	Quite a bit	Moderately	Moderately	Very slightly or not at all	Quite a bit	A little	Quite a bit	Moderately	A little	Moderately	Very slightly or not at all	Very slightly or not at all		3	3	5	4	7	7	10	5	5	50	51	60
Steve	R_sEWynhbZ6BVTQCl	D	8	7	6	6	8	8	6	Moderately	Strongly	Very Strongly	Moderately	Moderately	Moderately	Moderately	Moderately	Quite a bit	A little	Quite a bit	Extremely	Very slightly or not at all	Very slightly or not at all	Quite a bit	Moderately	A little	A little	Quite a bit	Quite a bit	Quite a bit	Moderately	Moderately	Extremely	Very slightly or not at all	Very slightly or not at all	Very slightly or not at all		3	0	0	0	3	2	4	10	15
None	R_3jV5iB6ThikN9ZF									Strongly	Strongly	Strongly	Moderately	Strongly	Quite a bit	Very slightly or not at all	Quite a bit	Very slightly or not at all	Very slightly or not at all	Very slightly or not at all	A little	A little	Very slightly or not at all	Quite a bit	Very slightly or not at all	Very slightly or not at all	Quite a bit	Very slightly or not at all	Quite a bit	Very slightly or not at all	Very slightly or not at all	Quite a bit	A little	A little	Very slightly or not at all	Very slightly or not at all		3	0	2	0	3	1	3	8	18
None	R_ZsnQbcLqLIxMEZr									Strongly	Strongly	Very Strongly	Strongly	Very Strongly	Quite a bit	A little	Quite a bit	Very slightly or not at all	Very slightly or not at all	A little	Very slightly or not at all	Very slightly or not at all	Very slightly or not at all	Extremely	Quite a bit	Very slightly or not at all	Quite a bit	A little	A little	Moderately	Quite a bit	Quite a bit	Very slightly or not at all	Moderately	A little	Very slightly or not at all		3	2	7	1	7	8	7	0	0
James	R_ysts4djUfPyh9G9	F	6	7	7	6	8	6	6	Very Strongly	Very Strongly	Strongly	Strongly	Strongly	Quite a bit	Very slightly or not at all	Moderately	Very slightly or not at all	Very slightly or not at all	A little	Very slightly or not at all	Very slightly or not at all	Very slightly or not at all	Moderately	A little	Very slightly or not at all	Moderately	Very slightly or not at all	Moderately	Very slightly or not at all	Moderately	Quite a bit	Very slightly or not at all	Quite a bit	Very slightly or not at all	Moderately		5	0	5	4	8	4	6	2	2
None	R_sFLS6MgbdUngJ3P									Strongly	Strongly	Strongly	Strongly	Slightly	Quite a bit	Very slightly or not at all	Moderately	Moderately	Very slightly or not at all	Very slightly or not at all	Very slightly or not at all	A little	A little	Moderately	A little	Very slightly or not at all	Moderately	Very slightly or not at all	A little	Moderately	Moderately	Quite a bit	A little	Moderately	A little	Moderately		7	0	5	1	6	6	6	8	15
None	R_9ZZhv7Hc3nyIqOJ									Strongly	Strongly	Strongly	Strongly	Moderately	A little	Very slightly or not at all	Moderately	Very slightly or not at all	Very slightly or not at all	Very slightly or not at all	Very slightly or not at all	Very slightly or not at all	Very slightly or not at all	A little	Very slightly or not at all	Very slightly or not at all	Moderately	Very slightly or not at all	A little	Very slightly or not at all	Very slightly or not at all	Quite a bit	Very slightly or not at all	Very slightly or not at all	Very slightly or not at all	Moderately		5	0	0	0	3	2	2	8	15
Steve	R_1pyhq3kxciz2UD4	E	9	7	4	6	9	5	8	Strongly	Strongly	Strongly	Moderately	Very Strongly	Quite a bit	Very slightly or not at all	Quite a bit	Moderately	Very slightly or not at all	A little	Very slightly or not at all	Very slightly or not at all	Very slightly or not at all	Extremely	Moderately	Very slightly or not at all	A little	Very slightly or not at all	A little	Very slightly or not at all	Moderately	Quite a bit	Very slightly or not at all	A little	Very slightly or not at all	Very slightly or not at all		3	0	3	1	6	7	4	8	12
Steve	R_2w7AXn5cPKQ8c1v	D	5	4	5	4	7	4	4	Moderately	Very Strongly	Strongly	Slightly	Moderately	Quite a bit	A little	Moderately	Moderately	Very slightly or not at all	Moderately	A little	A little	Very slightly or not at all	Moderately	Moderately	Very slightly or not at all	Quite a bit	Very slightly or not at all	A little	Moderately	Moderately	Quite a bit	Moderately	Quite a bit	A little	Very slightly or not at all		4	0	4	4	4	4	4	5	15
James	R_zYB6SeL8nJWH33z	F	7	9	7	8	8	8	9	Strongly	Very Strongly	Very Strongly	Strongly	Moderately	Extremely	Very slightly or not at all	Extremely	Moderately	Very slightly or not at all	Moderately	Very slightly or not at all	Very slightly or not at all	Very slightly or not at all	Extremely	Extremely	Moderately	Quite a bit	Very slightly or not at all	Extremely	Very slightly or not at all	Moderately	Quite a bit	Moderately	Quite a bit	Very slightly or not at all	Very slightly or not at all		6	0	3	3	6	7	7	0	0
Steve	R_3JsYGpf4eHrBzt1	A	Not at all (0)	7	7	7	Very Much (10)	9	6	Strongly	Very Strongly	Very Strongly	Not at all	Very Strongly	Extremely	Very slightly or not at all	Extremely	A little	Very slightly or not at all	A little	Very slightly or not at all	Very slightly or not at all	Very slightly or not at all	Extremely	A little	Very slightly or not at all	Quite a bit	Very slightly or not at all	Extremely	Very slightly or not at all	Extremely	Extremely	Very slightly or not at all	Moderately	Very slightly or not at all	Very slightly or not at all		0	0	0	0	0	0	0	0	20
James	R_30818pZazWXT3P	A	3	5	4	8	8	8	3	Strongly	Strongly	Moderately	Moderately	Strongly	Moderately	Moderately	A little	Very slightly or not at all	Very slightly or not at all	Very slightly or not at all	Very slightly or not at all	Very slightly or not at all	Very slightly or not at all	Very slightly or not at all	Very slightly or not at all	Very slightly or not at all	A little	Very slightly or not at all	Very slightly or not at all	Very slightly or not at all	Moderately	Very slightly or not at all	Very slightly or not at all	Very slightly or not at all	Very slightly or not at all	Very slightly or not at all		0	0	0	0	9	9	9	5	15	87	100	24
James	R_Twkg47qaYhDgLAd	B	2	2	2	4	7	3	2	Slightly	Moderately	Slightly	Moderately	Slightly	Quite a bit	A little	Moderately	Very slightly or not at all	Very slightly or not at all	A little	Very slightly or not at all	A little	Very slightly or not at all	Moderately	Very slightly or not at all	Very slightly or not at all	Quite a bit	Very slightly or not at all	A little	Moderately	Moderately	A little	Moderately	Moderately	A little	A little		4	0	2	0	4	4	3	10	0
None	R_31sze9OStdvvt2K									Strongly	Strongly	Strongly	Strongly	Moderately	Quite a bit	A little	Moderately	Quite a bit	Very slightly or not at all	Quite a bit	Very slightly or not at all	Very slightly or not at all	Very slightly or not at all	Moderately	Quite a bit	Very slightly or not at all	Quite a bit	Very slightly or not at all	Moderately	A little	Quite a bit	Quite a bit	Quite a bit	Quite a bit	Very slightly or not at all	Very slightly or not at all		7	4	6	4	7	7	7	2	11
None	R_QcW3snLw8RdEOn7									Strongly	Strongly	Strongly	Strongly	Moderately	A little	Very slightly or not at all	Moderately	Very slightly or not at all	Very slightly or not at all	Very slightly or not at all	Very slightly or not at all	Very slightly or not at all	Very slightly or not at all	Moderately	A little	Very slightly or not at all	Moderately	Very slightly or not at all	Moderately	Very slightly or not at all	A little	Quite a bit	Very slightly or not at all	Very slightly or not at all	Very slightly or not at all	Very slightly or not at all		5	3	6	4	5	4	9	6	6
None	R_2EAzOyuUx0TSATL									Very Strongly	Very Strongly	Very Strongly	Moderately	Strongly	Extremely	Very slightly or not at all	Extremely	A little	Very slightly or not at all	Moderately	Very slightly or not at all	Very slightly or not at all	Very slightly or not at all	Moderately	Quite a bit	A little	Quite a bit	Very slightly or not at all	Extremely	Quite a bit	Quite a bit	Extremely	Moderately	Quite a bit	Very slightly or not at all	Very slightly or not at all		7	3	6	0	6	4	6	10	10
Steve	R_TuvWj7drWA0sXMB	B	3	4	5	5	6	6	3	Moderately	Moderately	Slightly	Slightly	Moderately	Quite a bit	Very slightly or not at all	Moderately	Moderately	Very slightly or not at all	Moderately	Very slightly or not at all	Very slightly or not at all	A little	Quite a bit	A little	Very slightly or not at all	Moderately	Very slightly or not at all	Moderately	Very slightly or not at all	Moderately	Quite a bit	Very slightly or not at all	Quite a bit	Very slightly or not at all	Very slightly or not at all		6	3	3	3	9	9	9	10	10
None	R_2Slf8ZHeHMqyu73									Very Strongly	Strongly	Strongly	Very Strongly	Very Strongly	Quite a bit	Very slightly or not at all	Extremely	Very slightly or not at all	Very slightly or not at all	A little	Very slightly or not at all	Very slightly or not at all	Very slightly or not at all	Quite a bit	A little	Very slightly or not at all	Quite a bit	Very slightly or not at all	Moderately	A little	A little	Quite a bit	A little	Moderately	Very slightly or not at all	Moderately		5	0	0	0	3	4	5	2	0
Steve	R_1mwn6ZANoFTYRyO	D	5	7	4	7	8	4	5	Strongly	Strongly	Very Strongly	Slightly	Moderately	A little	Very slightly or not at all	A little	Moderately	Very slightly or not at all	A little	Very slightly or not at all	Very slightly or not at all	Very slightly or not at all	A little	Very slightly or not at all	Very slightly or not at all	A little	Very slightly or not at all	Very slightly or not at all	Very slightly or not at all	Very slightly or not at all	Moderately	Very slightly or not at all	Very slightly or not at all	Very slightly or not at all	Very slightly or not at all		4	0	3	0	6	5	6	10	15
James	IMPORTANT DO NOT SCRUB She didn't do the booking and closed the link but we have her data Adriana 1:30PM Wednesday 7 June 2017	B	2	2	4	7	7	8	1	Moderately	Moderately	Moderately	Slightly	Moderately	Quite a bit	Very slightly or not at all	Quite a bit	A little	Very slightly or not at all	Quite a bit	Very slightly or not at all	Very slightly or not at all	Very slightly or not at all	Extremely	Moderately	A little	Extremely	Very slightly or not at all	Quite a bit	A little	Quite a bit	Extremely	A little	Quite a bit	Very slightly or not at all	Quite a bit		7	0	6	4	6	5	8	10	15	51	51	10
James	R_3M068zX7AzD3Heu	E	9	8	7	8	9	Very Much (10)	7	Very Strongly	Strongly	Strongly	Strongly	Very Strongly	Extremely	Very slightly or not at all	Quite a bit	Quite a bit	Very slightly or not at all	Extremely	Very slightly or not at all	Very slightly or not at all	Very slightly or not at all	Moderately	Quite a bit	Very slightly or not at all	Quite a bit	Very slightly or not at all	Quite a bit	Very slightly or not at all	Extremely	Extremely	Very slightly or not at all	Extremely	Very slightly or not at all	Very slightly or not at all		7	0	5	0	9	8	8	8	10
James	R_1H2DA5LKQy16xil	D	6	7	6	6	7	7	7	Moderately	Strongly	Moderately	Not at all	Moderately	Quite a bit	Very slightly or not at all	Moderately	Moderately	Very slightly or not at all	Moderately	Very slightly or not at all	Very slightly or not at all	Very slightly or not at all	Moderately	A little	Very slightly or not at all	Moderately	Very slightly or not at all	A little	Very slightly or not at all	A little	Moderately	Very slightly or not at all	A little	Very slightly or not at all	Very slightly or not at all		5	0	1	0	5	5	7	5	5	70	71	70
None	R_qznNXTTo4OhWCA1									Strongly	Moderately	Strongly	Moderately	Strongly	Extremely	Very slightly or not at all	Moderately	Very slightly or not at all	Very slightly or not at all	Very slightly or not at all	Very slightly or not at all	Very slightly or not at all	Very slightly or not at all	Very slightly or not at all	Very slightly or not at all	Very slightly or not at all	Extremely	Very slightly or not at all	Very slightly or not at all	Very slightly or not at all	Very slightly or not at all	Quite a bit	Very slightly or not at all	Moderately	Very slightly or not at all	A little		3	0	2	0	8	8	8	6	15
Steve	R_3MagQxD45PrRIQj	D	5	6	5	6	9	7	6	Strongly	Strongly	Moderately	Moderately	Strongly	Extremely	Very slightly or not at all	Quite a bit	Very slightly or not at all	Very slightly or not at all	A little	Very slightly or not at all	Very slightly or not at all	Very slightly or not at all	Moderately	A little	Very slightly or not at all	Extremely	Very slightly or not at all	A little	Very slightly or not at all	A little	Quite a bit	A little	Quite a bit	Very slightly or not at all	Quite a bit		4	0	1	1	5	5	5	10	15
None	R_1n0C8jDvL5LipoM									Strongly	Strongly	Moderately	Very Strongly	Strongly	Quite a bit	Very slightly or not at all	Moderately	A little	Very slightly or not at all	Very slightly or not at all	Very slightly or not at all	A little	Very slightly or not at all	Moderately	A little	A little	A little	Very slightly or not at all	A little	Moderately	A little	Quite a bit	Quite a bit	Quite a bit	A little	Very slightly or not at all		4	1	4	1	3	4	6	10	15
None	R_3NX9hHbjgAbJiqB
James	R_1mfNysUEQ0TMtBi	D	3	1	5	3	3	3	4	Moderately	Strongly	Strongly	Strongly	Slightly	Quite a bit	A little	Moderately	Moderately	Very slightly or not at all	Moderately	A little	Very slightly or not at all	Very slightly or not at all	A little	Very slightly or not at all	Very slightly or not at all	Moderately	Very slightly or not at all	A little	Very slightly or not at all	A little	Very slightly or not at all	A little	Moderately	A little	Very slightly or not at all		2	0	3	2	6	7	7	6	10	40	47	19
Steve	R_1f6FD7XPp1BDp0e	D	6	8	5	9	7	5	5	Moderately	Strongly	Strongly	Slightly	Strongly	Moderately	Very slightly or not at all	Moderately	Quite a bit	Very slightly or not at all	Quite a bit	Very slightly or not at all	Very slightly or not at all	Very slightly or not at all	Quite a bit	Quite a bit	A little	Quite a bit	Very slightly or not at all	Extremely	Moderately	Quite a bit	Quite a bit	A little	Moderately	Very slightly or not at all	Very slightly or not at all		5	3	4	3	6	5	7	8	15
James	R_1CyFOyQvNmaC8XD	C	3	6	3	7	7	3	3	Moderately	Very Strongly	Moderately	Slightly	Strongly	Quite a bit	Very slightly or not at all	Moderately	Moderately	Very slightly or not at all	A little	Very slightly or not at all	Very slightly or not at all	Very slightly or not at all	Moderately	A little	Very slightly or not at all	Quite a bit	Very slightly or not at all	Moderately	A little	Quite a bit	Moderately	A little	Moderately	Very slightly or not at all	Very slightly or not at all		6	0	6	0	6	7	6	9	15	60	72	53
Steve	R_3G0QZugGC2PNGb9	F	7	Very Much (10)	6	Very Much (10)	Very Much (10)	5	6	Very Strongly	Very Strongly	Very Strongly	Strongly	Very Strongly	Extremely	Very slightly or not at all	Quite a bit	A little	Very slightly or not at all	A little	Very slightly or not at all	Very slightly or not at all	Very slightly or not at all	Moderately	Moderately	Very slightly or not at all	Extremely	Very slightly or not at all	A little	Very slightly or not at all	A little	Quite a bit	Very slightly or not at all	Moderately	Very slightly or not at all	Very slightly or not at all		4	0	4	0	5	5	5	2	15
James	R_pshBFBd3iNDe3L3	C	2	6	3	9	8	3	6	Moderately	Strongly	Strongly	Moderately	Strongly	Extremely	Very slightly or not at all	Extremely	Quite a bit	Very slightly or not at all	Moderately	Very slightly or not at all	Very slightly or not at all	Very slightly or not at all	Quite a bit	Quite a bit	Very slightly or not at all	Quite a bit	Very slightly or not at all	Quite a bit	Very slightly or not at all	Moderately	Quite a bit	Quite a bit	Quite a bit	Very slightly or not at all	Very slightly or not at all		0	0	0	0	7	6	7	10	15	75	75	50
None	R_2wzspZbWFLnmRhV									Moderately	Strongly	Strongly	Moderately	Slightly	Quite a bit	Very slightly or not at all	A little	Extremely	Very slightly or not at all	Quite a bit	Very slightly or not at all	Very slightly or not at all	Moderately	Extremely	Moderately	A little	A little	Very slightly or not at all	Quite a bit	Very slightly or not at all	Extremely	Moderately	Very slightly or not at all	Quite a bit	Very slightly or not at all	Very slightly or not at all		4	0	7	0	4	2	6	8	15
None	R_qCQqllbEvPeMgX7									Very Strongly	Very Strongly	Very Strongly	Strongly	Very Strongly	Extremely	Very slightly or not at all	Extremely	Moderately	Very slightly or not at all	Moderately	Very slightly or not at all	Very slightly or not at all	Very slightly or not at all	Quite a bit	Moderately	Very slightly or not at all	Quite a bit	Very slightly or not at all	Extremely	Very slightly or not at all	Quite a bit	Quite a bit	Very slightly or not at all	Extremely	Very slightly or not at all	Quite a bit		6	0	3	0	6	6	6	10	15
None	R_2BnwKWIjVXyH9j2									Strongly	Strongly	Strongly	Moderately	Strongly	Quite a bit	Moderately	A little	Very slightly or not at all	Quite a bit	Moderately	Moderately	A little	A little	A little	A little	A little	Moderately	A little	Moderately	Moderately	Moderately	Moderately	Quite a bit	Very slightly or not at all	Very slightly or not at all	A little		5	5	5	1	6	4	4	10	15
None	R_1QJAMsA9FOnUAyS									Strongly	Strongly	Strongly	Moderately	Moderately	Quite a bit	Very slightly or not at all	Moderately	Very slightly or not at all	Very slightly or not at all	Very slightly or not at all	Very slightly or not at all	Very slightly or not at all	Very slightly or not at all	A little	Very slightly or not at all	Very slightly or not at all	Very slightly or not at all	Very slightly or not at all	Very slightly or not at all	Very slightly or not at all	Very slightly or not at all	Moderately	Very slightly or not at all	Very slightly or not at all	Very slightly or not at all	A little		4	0	4	0	6	5	6	2	15
None	R_1IT13m3iqkerSPG									Strongly	Strongly	Strongly	Very Strongly	Very Strongly	Extremely	Very slightly or not at all	Moderately	Very slightly or not at all	Very slightly or not at all	A little	Very slightly or not at all	Very slightly or not at all	A little	A little	A little	Quite a bit	A little	Very slightly or not at all	Very slightly or not at all	Moderately	A little	Moderately	Moderately	Very slightly or not at all	Very slightly or not at all	A little		4	3	3	1	4	4	6	5	15
James	R_3qx0g7iBPj98pX2	A	1	3	Not at all (0)	Not at all (0)	1	Not at all (0)	Not at all (0)	Moderately	Moderately	Moderately	Not at all	Slightly	A little	Very slightly or not at all	A little	Very slightly or not at all	Very slightly or not at all	Moderately	Very slightly or not at all	Very slightly or not at all	Very slightly or not at all	A little	Moderately	Very slightly or not at all	Quite a bit	Very slightly or not at all	Very slightly or not at all	Very slightly or not at all	Very slightly or not at all	Quite a bit	Very slightly or not at all	A little	Very slightly or not at all	Quite a bit		0	0	0	0	8	0	0	5	30
None	R_2uUmr56yoitjLru									Very Strongly	Moderately	Strongly	Moderately	Moderately	Quite a bit	Very slightly or not at all	Quite a bit	Very slightly or not at all	A little	Very slightly or not at all	Very slightly or not at all	Very slightly or not at all	Very slightly or not at all	Quite a bit	Quite a bit	Very slightly or not at all	Very slightly or not at all	Very slightly or not at all	Moderately	Very slightly or not at all	Moderately	Moderately	Very slightly or not at all	Quite a bit	Very slightly or not at all	Very slightly or not at all		0	3	0	0	8	6	10	10	0
James	R_1oGt7QNAvkJjl3E	E	4	2	3	3	5	4	1	Moderately	Strongly	Slightly	Slightly	Moderately	Quite a bit	Extremely	Quite a bit	Very slightly or not at all	Very slightly or not at all	A little	Very slightly or not at all	Very slightly or not at all	Very slightly or not at all	Quite a bit	A little	Very slightly or not at all	Extremely	Very slightly or not at all	Very slightly or not at all	Quite a bit	Quite a bit	Quite a bit	Quite a bit	Quite a bit	Very slightly or not at all	Quite a bit		6	0	7	1	2	2	2	10	15
James	R_4U75rCoCPiX4ecx	B	2	3	2	3	3	2	2	Slightly	Moderately	Moderately	Slightly	Not at all	Moderately	A little	A little	Very slightly or not at all	A little	A little	Very slightly or not at all	Very slightly or not at all	A little	A little	Very slightly or not at all	A little	Moderately	A little	A little	Moderately	A little	Moderately	Quite a bit	Moderately	Very slightly or not at all	Very slightly or not at all		6	3	6	5	5	3	3	10	15	50	50	35
James	R_1hGSnhawH8veQ1m	B	1	3	4	3	6	4	2	Strongly	Very Strongly	Strongly	Moderately	Strongly	Quite a bit	Very slightly or not at all	Moderately	A little	Very slightly or not at all	A little	Very slightly or not at all	Very slightly or not at all	Very slightly or not at all	Moderately	A little	A little	Moderately	Very slightly or not at all	A little	A little	A little	Quite a bit	Moderately	A little	Very slightly or not at all	A little		4	0	4	0	4	4	6	6	12	65	74	58
Steve	R_2PzC7GFA8j85dPV	D	3	2	3	5	5	4	2	Moderately	Strongly	Moderately	Slightly	Slightly	Moderately	Very slightly or not at all	Moderately	Moderately	Very slightly or not at all	Moderately	Very slightly or not at all	Very slightly or not at all	Very slightly or not at all	Moderately	Very slightly or not at all	Very slightly or not at all	Quite a bit	Very slightly or not at all	Moderately	Very slightly or not at all	Very slightly or not at all	Quite a bit	A little	Moderately	Very slightly or not at all	Very slightly or not at all		5	0	5	0	2	6	3	3	10
Steve	R_1rDOkiEG7VZGfin	B	3	5	3	7	3	5	3	Slightly	Strongly	Slightly	Slightly	Strongly	Quite a bit	Very slightly or not at all	A little	Very slightly or not at all	Very slightly or not at all	A little	Very slightly or not at all	Very slightly or not at all	Very slightly or not at all	Moderately	A little	Very slightly or not at all	Moderately	Very slightly or not at all	Quite a bit	A little	Moderately	Extremely	A little	Moderately	Very slightly or not at all	A little		6	2	4	2	7	4	6	3	0
Steve	R_WpnlQ7T5iw2Y0JH	B	2	3	3	4	5	5	1	Slightly	Moderately	Slightly	Slightly	Moderately	Quite a bit	Very slightly or not at all	A little	Very slightly or not at all	Very slightly or not at all	A little	Very slightly or not at all	Very slightly or not at all	Very slightly or not at all	Moderately	A little	A little	Moderately	Very slightly or not at all	A little	Very slightly or not at all	A little	Moderately	A little	A little	Very slightly or not at all	Moderately		7	1	7	1	7	7	7	10	15
Steve	R_0Dv0ze3v3ssjRn3	D	7	5	7	5	6	5	6	Moderately	Strongly	Strongly	Slightly	Slightly	Moderately	Very slightly or not at all	Very slightly or not at all	Very slightly or not at all	Very slightly or not at all	Very slightly or not at all	Very slightly or not at all	Very slightly or not at all	Very slightly or not at all	Very slightly or not at all	Very slightly or not at all	Very slightly or not at all	A little	Very slightly or not at all	Very slightly or not at all	Very slightly or not at all	Very slightly or not at all	A little	Very slightly or not at all	Very slightly or not at all	Very slightly or not at all	Very slightly or not at all		7	0	7	0	8	8	8	10	15
James	R_cVoSAW5a7hfDJOF	D	6	7	5	7	8	7	6	Strongly	Strongly	Strongly	Strongly	Strongly	Quite a bit	A little	Moderately	A little	A little	Moderately	A little	Moderately	A little	Moderately	Moderately	A little	Moderately	A little	Moderately	A little	A little	Moderately	Moderately	A little	Moderately	Moderately		3	6	4	6	3	5	4	2	30	38	41	33
Steve	R_XiIX5JvFabYNLMt	C	4	7	6	Very Much (10)	Very Much (10)	Very Much (10)	4	Very Strongly	Very Strongly	Very Strongly	Not at all	Very Strongly	Extremely	Very slightly or not at all	Extremely	Quite a bit	Very slightly or not at all	Quite a bit	Very slightly or not at all	Very slightly or not at all	Very slightly or not at all	Extremely	Very slightly or not at all	Very slightly or not at all	Quite a bit	Very slightly or not at all	Extremely	Very slightly or not at all	Very slightly or not at all	Extremely	A little	Extremely	Very slightly or not at all	Very slightly or not at all		7	0	0	0	9	10	9	5	15
Steve	R_2P67Lqg3SuuVgVr	B	Not at all (0)	5	4	4	6	Not at all (0)	2	Moderately	Strongly	Strongly	Moderately	Strongly	Extremely	Very slightly or not at all	Quite a bit	Moderately	Very slightly or not at all	Moderately	Very slightly or not at all	Very slightly or not at all	Very slightly or not at all	Quite a bit	Moderately	Very slightly or not at all	Quite a bit	Very slightly or not at all	Moderately	Very slightly or not at all	Quite a bit	Extremely	A little	Quite a bit	Very slightly or not at all	Very slightly or not at all		4	0	0	0	6	0	6	3	0
None	R_XLcVSs3YRMfhXvX									Very Strongly	Very Strongly	Very Strongly	Moderately	Strongly	Quite a bit	Very slightly or not at all	Moderately	Very slightly or not at all	Very slightly or not at all	Very slightly or not at all	Very slightly or not at all	Very slightly or not at all	Very slightly or not at all	Quite a bit	Very slightly or not at all	Very slightly or not at all	Quite a bit	Very slightly or not at all	Moderately	Very slightly or not at all	Very slightly or not at all	Quite a bit	Very slightly or not at all	Very slightly or not at all	Very slightly or not at all	Very slightly or not at all		2	0	1	0	7	6	6	3	10
James	R_pKsM4FOBpLdbbjP	B	3	7	4	7	8	4	2	Strongly	Moderately	Strongly	Slightly	Moderately	Quite a bit	Very slightly or not at all	Moderately	A little	Very slightly or not at all	Moderately	Very slightly or not at all	Very slightly or not at all	Very slightly or not at all	Moderately	Moderately	Very slightly or not at all	Quite a bit	Very slightly or not at all	Moderately	A little	Moderately	Quite a bit	Very slightly or not at all	Quite a bit	Very slightly or not at all	Quite a bit		2	0	1	0	3	3	3	5	0
None	R_2uBZEPkFktiuvQa									Strongly	Very Strongly	Strongly	Moderately	Strongly	Moderately	Very slightly or not at all	Moderately	A little	Very slightly or not at all	A little	Very slightly or not at all	Very slightly or not at all	Very slightly or not at all	Moderately	Moderately	Very slightly or not at all	Moderately	Very slightly or not at all	Moderately	Very slightly or not at all	Moderately	Moderately	Very slightly or not at all	A little	Very slightly or not at all	Very slightly or not at all		1	0	0	0	0	0	0	0	0
None	R_1IyMsvmlSCSzj6N									Moderately	Moderately	Slightly	Moderately	Moderately	Quite a bit	Very slightly or not at all	Moderately	Very slightly or not at all	Very slightly or not at all	A little	Very slightly or not at all	Very slightly or not at all	Very slightly or not at all	Quite a bit	A little	Very slightly or not at all	Quite a bit	Very slightly or not at all	Quite a bit	Very slightly or not at all	Moderately	Quite a bit	A little	Quite a bit	Very slightly or not at all	Quite a bit		7	2	6	5	7	4	5	6	15
James	R_3OibPYpvbhB9NfZ	F	7	Very Much (10)	7	7	Very Much (10)	7	8	Very Strongly	Very Strongly	Very Strongly	Strongly	Strongly	Quite a bit	Very slightly or not at all	Quite a bit	Moderately	Very slightly or not at all	Moderately	Very slightly or not at all	Very slightly or not at all	Very slightly or not at all	Quite a bit	Very slightly or not at all	Very slightly or not at all	Extremely	A little	A little	Moderately	Moderately	Extremely	A little	Moderately	Very slightly or not at all	Moderately		0	0	0	0	0	0	0	4	0	80	80	50
James	R_3DcFraHTdwbJxf8	E	2	3	3	3	8	7	2	Very Strongly	Very Strongly	Very Strongly	Moderately	Moderately	Extremely	Very slightly or not at all	Moderately	Moderately	Very slightly or not at all	Very slightly or not at all	Very slightly or not at all	Very slightly or not at all	Very slightly or not at all	Very slightly or not at all	Very slightly or not at all	Very slightly or not at all	Quite a bit	Very slightly or not at all	Very slightly or not at all	Very slightly or not at all	Very slightly or not at all	Quite a bit	Very slightly or not at all	Very slightly or not at all	Very slightly or not at all	Very slightly or not at all		1	0	0	0	2	2	1	10	15	80	80	51
None	R_2YWbpeR8KNmrk13									Strongly	Strongly	Moderately	Moderately	Very Strongly	Extremely	Very slightly or not at all	Quite a bit	A little	Very slightly or not at all	Moderately	Very slightly or not at all	Very slightly or not at all	Very slightly or not at all	Quite a bit	Moderately	Very slightly or not at all	Extremely	Very slightly or not at all	Moderately	Very slightly or not at all	A little	Extremely	A little	Moderately	Very slightly or not at all	A little		6	0	0	0	6	6	6	10	15
James	R_1NDG73EpI8id6K5	E	6	5	6	6	8	7	5	Strongly	Very Strongly	Slightly	Moderately	Slightly	Quite a bit	Very slightly or not at all	Quite a bit	Moderately	Very slightly or not at all	Moderately	Very slightly or not at all	Very slightly or not at all	Very slightly or not at all	A little	Moderately	Very slightly or not at all	Quite a bit	Very slightly or not at all	Moderately	Very slightly or not at all	Quite a bit	Quite a bit	A little	Quite a bit	Very slightly or not at all	Very slightly or not at all		5	0	2	0	5	5	6	5	15	82	80	90
Steve	R_1Fstlwi4WrcGmsj	A	Not at all (0)	6	3	7	5	3	2	Moderately	Strongly	Moderately	Moderately	Strongly	Extremely	Very slightly or not at all	Extremely	Very slightly or not at all	Very slightly or not at all	A little	Very slightly or not at all	A little	Very slightly or not at all	Extremely	Moderately	Very slightly or not at all	A little	Very slightly or not at all	Moderately	Moderately	Quite a bit	Quite a bit	A little	Extremely	Very slightly or not at all	Extremely		0	0	0	0	7	6	8	4	12
None	R_2SxknICHYajLLAl									Moderately	Strongly	Slightly	Not at all	Slightly	Very slightly or not at all	Very slightly or not at all	Very slightly or not at all	A little	Very slightly or not at all	Very slightly or not at all	A little	Very slightly or not at all	Very slightly or not at all	Very slightly or not at all	A little	A little	Quite a bit	Very slightly or not at all	A little	A little	A little	Quite a bit	Very slightly or not at all	Very slightly or not at all	A little	A little		3	5	8	1	2	2	2	8	14
James	R_yL6wcowtX9P2jMB	A	1	3	5	5	6	5	2	Strongly	Strongly	Strongly	Strongly	Slightly	Extremely	A little	Quite a bit	Very slightly or not at all	Very slightly or not at all	A little	Very slightly or not at all	Moderately	Very slightly or not at all	Moderately	Very slightly or not at all	Very slightly or not at all	Quite a bit	Very slightly or not at all	Moderately	Quite a bit	Moderately	Quite a bit	Quite a bit	Moderately	Moderately	Moderately		4	0	5	0	6	7	7	3	11
None	R_2zc1JsblggbYKFM									Moderately	Strongly	Moderately	Very Strongly	Slightly	Quite a bit	A little	Moderately	Very slightly or not at all	A little	Very slightly or not at all	Very slightly or not at all	Very slightly or not at all	Very slightly or not at all	A little	Very slightly or not at all	Very slightly or not at all	Moderately	Very slightly or not at all	A little	A little	A little	Moderately	Moderately	Moderately	Very slightly or not at all	A little		4	0	4	0	2	6	4	6	15
None	R_1loOTw1ltapndhW									Very Strongly	Very Strongly	Very Strongly	Moderately	Strongly	Quite a bit	Very slightly or not at all	A little	Very slightly or not at all	Very slightly or not at all	Very slightly or not at all	Very slightly or not at all	Very slightly or not at all	Very slightly or not at all	Moderately	Very slightly or not at all	Very slightly or not at all	Moderately	Very slightly or not at all	A little	Very slightly or not at all	Very slightly or not at all	Moderately	Very slightly or not at all	A little	Very slightly or not at all	Very slightly or not at all		5	0	4	0	7	5	7	3	5
James	R_BunHSTFEOQYRMXL	C	6	3	4	6	8	2	3	Moderately	Moderately	Strongly	Moderately	Slightly	Quite a bit	Very slightly or not at all	Moderately	Very slightly or not at all	Very slightly or not at all	Very slightly or not at all	Very slightly or not at all	Very slightly or not at all	Very slightly or not at all	Moderately	Very slightly or not at all	Very slightly or not at all	Quite a bit	Very slightly or not at all	A little	Very slightly or not at all	A little	Quite a bit	A little	A little	Very slightly or not at all	Very slightly or not at all		3	0	2	0	3	5	5	0	0
James	R_1Nmrt6JzdBu8JW1	E	7	3	8	8	4	8	6	Strongly	Very Strongly	Strongly	Moderately	Moderately	Extremely	Very slightly or not at all	Moderately	A little	Very slightly or not at all	Moderately	Very slightly or not at all	Very slightly or not at all	Very slightly or not at all	Moderately	A little	Very slightly or not at all	Extremely	Very slightly or not at all	Moderately	A little	Quite a bit	Extremely	A little	A little	Very slightly or not at all	Moderately		7	3	6	2	8	6	8	4	12	87	90	81
None	R_3JnqwBFQMTzO0de									Moderately	Slightly	Slightly	Very Strongly	Strongly	Quite a bit	Very slightly or not at all	Moderately	Very slightly or not at all	Very slightly or not at all	Quite a bit	Very slightly or not at all	Very slightly or not at all	Very slightly or not at all	Quite a bit	Quite a bit	Very slightly or not at all	Extremely	Very slightly or not at all	Quite a bit	Very slightly or not at all	Extremely	Extremely	Very slightly or not at all	Quite a bit	Very slightly or not at all	Quite a bit		6	0	6	0	7	7	8	4	15
James	R_R3rztU8vojNaFAl	F	8	4	9	7	7	7	9	Very Strongly	Very Strongly	Strongly	Strongly	Moderately	Quite a bit	Very slightly or not at all	Extremely	Moderately	Very slightly or not at all	Moderately	Very slightly or not at all	Very slightly or not at all	Very slightly or not at all	Quite a bit	Quite a bit	Very slightly or not at all	Extremely	Very slightly or not at all	Quite a bit	Very slightly or not at all	A little	Moderately	Very slightly or not at all	Moderately	Very slightly or not at all	Very slightly or not at all		6	0	3	0	6	6	6	5	0	84	72	77
None	R_23dDQnoQ9k56O4z									Strongly	Strongly	Strongly	Strongly	Moderately	Quite a bit	Very slightly or not at all	Moderately	Moderately	Very slightly or not at all	Moderately	Very slightly or not at all	Very slightly or not at all	Very slightly or not at all	Quite a bit	Very slightly or not at all	A little	Quite a bit	Very slightly or not at all	Very slightly or not at all	A little	Very slightly or not at all	Quite a bit	A little	Moderately	Very slightly or not at all	Very slightly or not at all		3	1	2	0	7	6	7	10	0
James	R_2xMpOPdVuDCIs35	C	3	8	3	4	7	7	4	Strongly	Strongly	Strongly	Slightly	Very Strongly	Quite a bit	Very slightly or not at all	Quite a bit	A little	Very slightly or not at all	Moderately	Very slightly or not at all	Very slightly or not at all	Very slightly or not at all	Quite a bit	Moderately	Very slightly or not at all	Quite a bit	Very slightly or not at all	A little	A little	Moderately	Quite a bit	Very slightly or not at all	Moderately	Very slightly or not at all	Very slightly or not at all		3	0	2	3	1	1	3	5	8	43	80	41
Steve	R_t06wmHBrnfVXmZr	A	3	3	3	3	3	3	3	Moderately	Moderately	Moderately	Moderately	Moderately	A little	Very slightly or not at all	Very slightly or not at all	Very slightly or not at all	Very slightly or not at all	Very slightly or not at all	Very slightly or not at all	Very slightly or not at all	Very slightly or not at all	Very slightly or not at all	Very slightly or not at all	Very slightly or not at all	A little	Very slightly or not at all	Very slightly or not at all	Very slightly or not at all	Very slightly or not at all	Very slightly or not at all	Very slightly or not at all	Very slightly or not at all	Very slightly or not at all	Very slightly or not at all		3	0	3	0	3	3	3	0	0
Steve	R_27QcJnZTHEZdVqc	D	6	4	7	3	8	3	6	Strongly	Strongly	Moderately	Slightly	Moderately	Extremely	Very slightly or not at all	Moderately	Moderately	Very slightly or not at all	Quite a bit	Very slightly or not at all	A little	Very slightly or not at all	Quite a bit	Moderately	Very slightly or not at all	Extremely	Very slightly or not at all	Moderately	A little	Moderately	Quite a bit	Very slightly or not at all	Quite a bit	Very slightly or not at all	A little		9	0	6	0	9	8	10	1	3
None	R_3GuF1CnjADQ4th6									Moderately	Moderately	Moderately	Slightly	Not at all	Quite a bit	Very slightly or not at all	Moderately	A little	Very slightly or not at all	Very slightly or not at all	Very slightly or not at all	Very slightly or not at all	Very slightly or not at all	A little	A little	Very slightly or not at all	Moderately	Very slightly or not at all	A little	A little	A little	Moderately	A little	A little	Very slightly or not at all	A little		3	1	1	1	6	6	6	10	15
None	R_21oLvcBtXpTRVvX									Strongly	Very Strongly	Strongly	Very Strongly	Very Strongly	Quite a bit	Very slightly or not at all	Quite a bit	Very slightly or not at all	Very slightly or not at all	Very slightly or not at all	Very slightly or not at all	Very slightly or not at all	Very slightly or not at all	A little	Very slightly or not at all	Very slightly or not at all	Very slightly or not at all	Very slightly or not at all	A little	Very slightly or not at all	A little	A little	Very slightly or not at all	Very slightly or not at all	Very slightly or not at all	Very slightly or not at all		2	0	1	0	0	0	0	10	15
James	R_1OBvbTfTgfWpU1k	A	Not at all (0)	6	2	5	8	7	Not at all (0)	Strongly	Strongly	Strongly	Strongly	Moderately	Extremely	A little	Moderately	A little	Very slightly or not at all	Very slightly or not at all	Very slightly or not at all	Very slightly or not at all	Very slightly or not at all	Quite a bit	A little	Very slightly or not at all	Extremely	Very slightly or not at all	A little	A little	Moderately	Extremely	Quite a bit	Quite a bit	Very slightly or not at all	Very slightly or not at all		4	0	2	0	3	2	2	5	15
James	R_2rYqdXAxAoUKkt6	G	Very Much (10)	9	9	9	9	9	9	Very Strongly	Very Strongly	Very Strongly	Very Strongly	Moderately	Extremely	Very slightly or not at all	Extremely	Very slightly or not at all	Very slightly or not at all	Moderately	Very slightly or not at all	Very slightly or not at all	Very slightly or not at all	Extremely	Quite a bit	Very slightly or not at all	Very slightly or not at all	Very slightly or not at all	Quite a bit	Very slightly or not at all	Quite a bit	Quite a bit	Very slightly or not at all	Quite a bit	Very slightly or not at all	Moderately		7	1	7	1	7	7	7	6	1	80	80	84
Steve	R_3h3o7eUyG0NB8tR	C	4	6	5	6	8	5	6	Strongly	Strongly	Strongly	Slightly	Slightly	Quite a bit	A little	Quite a bit	Moderately	A little	Moderately	Very slightly or not at all	A little	Very slightly or not at all	Quite a bit	A little	Very slightly or not at all	A little	Very slightly or not at all	Moderately	A little	Quite a bit	A little	A little	A little	Very slightly or not at all	Moderately		7	2	3	1	6	7	6	10	15
James	R_24obAZEaI3BjeTz	A	Not at all (0)	1	Not at all (0)	3	2	2	Not at all (0)	Moderately	Moderately	Moderately	Moderately	Strongly	Moderately	Very slightly or not at all	Very slightly or not at all	A little	A little	Very slightly or not at all	Very slightly or not at all	Very slightly or not at all	Very slightly or not at all	Very slightly or not at all	Very slightly or not at all	Very slightly or not at all	Very slightly or not at all	Very slightly or not at all	Very slightly or not at all	A little	Very slightly or not at all	Very slightly or not at all	Moderately	Very slightly or not at all	Very slightly or not at all	Moderately		0	0	0	0	2	2	2	7	15	32	51	29
None	R_tQkhDmTVjIyuox3									Strongly	Strongly	Strongly	Strongly	Moderately	Moderately	Very slightly or not at all	A little	Very slightly or not at all	A little	A little	Very slightly or not at all	Very slightly or not at all	Very slightly or not at all	Very slightly or not at all	Very slightly or not at all	A little	Moderately	Very slightly or not at all	Very slightly or not at all	Very slightly or not at all	A little	Moderately	Very slightly or not at all	Moderately	Very slightly or not at all	Moderately		7	0	7	0	7	7	7	10	15
None	R_1OJ0xj8TDpTxPp6									Strongly	Very Strongly	Strongly	Very Strongly	Very Strongly	Quite a bit	Very slightly or not at all	Quite a bit	Very slightly or not at all	Very slightly or not at all	Moderately	Very slightly or not at all	Very slightly or not at all	Very slightly or not at all	Moderately	A little	Very slightly or not at all	Moderately	Very slightly or not at all	Moderately	Very slightly or not at all	Very slightly or not at all	A little	Very slightly or not at all	A little	Very slightly or not at all	A little		7	3	7	4	9	9	9	0	0
None	R_aWxu7unKjucC6zL									Slightly	Moderately	Moderately	Moderately	Strongly	Quite a bit	Very slightly or not at all	A little	Very slightly or not at all	Very slightly or not at all	A little	Very slightly or not at all	Very slightly or not at all	Very slightly or not at all	A little	Very slightly or not at all	Very slightly or not at all	Moderately	Very slightly or not at all	A little	A little	Moderately	Quite a bit	Very slightly or not at all	Very slightly or not at all	A little	Very slightly or not at all		1	0	0	0	2	3	8	10	15
James	R_31dh6dkAIj7SOD8	C	6	6	5	8	8	7	5	Strongly	Strongly	Very Strongly	Moderately	Strongly	Quite a bit	Moderately	Very slightly or not at all	A little	Very slightly or not at all	A little	Very slightly or not at all	A little	Very slightly or not at all	A little	Moderately	Very slightly or not at all	A little	Very slightly or not at all	Very slightly or not at all	Moderately	Very slightly or not at all	A little	Moderately	A little	Very slightly or not at all	A little		6	0	0	0	4	4	6	2	10
Steve	R_2aEMCzAEnCfwKtK	D	6	8	4	8	9	8	7	Strongly	Very Strongly	Very Strongly	Very Strongly	Very Strongly	Quite a bit	Very slightly or not at all	Moderately	A little	Very slightly or not at all	Quite a bit	Very slightly or not at all	Very slightly or not at all	Very slightly or not at all	Extremely	Quite a bit	Very slightly or not at all	Very slightly or not at all	Very slightly or not at all	Moderately	Very slightly or not at all	A little	Extremely	A little	Quite a bit	Very slightly or not at all	Moderately		9	0	0	0	8	7	9	10	15
None	R_2D0ove9toKig0C6									Strongly	Moderately	Strongly	Strongly	Slightly	Extremely	Very slightly or not at all	Quite a bit	Very slightly or not at all	Very slightly or not at all	Quite a bit	Very slightly or not at all	Very slightly or not at all	Very slightly or not at all	Extremely	A little	Very slightly or not at all	Quite a bit	Very slightly or not at all	Moderately	A little	Moderately	Moderately	Moderately	A little	Very slightly or not at all	Very slightly or not at all		7	0	0	0	5	5	8	10	15
None	R_b89TRzlde4my9yx									Strongly	Strongly	Strongly	Moderately	Strongly	Moderately	Very slightly or not at all	Moderately	Very slightly or not at all	Very slightly or not at all	Very slightly or not at all	Very slightly or not at all	Very slightly or not at all	Very slightly or not at all	Moderately	Very slightly or not at all	Very slightly or not at all	A little	Very slightly or not at all	A little	A little	Very slightly or not at all	A little	A little	Very slightly or not at all	Very slightly or not at all	Very slightly or not at all		4	0	4	0	4	2	5	4	15
None	R_YSSiS8g6wZu1vUd									Slightly	Strongly	Moderately	Slightly	Moderately	Quite a bit	Very slightly or not at all	A little	Very slightly or not at all	Very slightly or not at all	Very slightly or not at all	Very slightly or not at all	Very slightly or not at all	Very slightly or not at all	Very slightly or not at all	Very slightly or not at all	Very slightly or not at all	Quite a bit	Very slightly or not at all	Very slightly or not at all	Very slightly or not at all	A little	Quite a bit	A little	A little	Very slightly or not at all	Very slightly or not at all		4	1	3	1	7	8	8	7	10
James	R_1rCZeaJeXFHWQBi	B	2	Not at all (0)	5	6	2	2	1	Slightly	Moderately	Slightly	Slightly	Not at all	A little	Very slightly or not at all	Very slightly or not at all	Very slightly or not at all	Very slightly or not at all	Very slightly or not at all	Very slightly or not at all	Very slightly or not at all	Very slightly or not at all	A little	Very slightly or not at all	Very slightly or not at all	Very slightly or not at all	Very slightly or not at all	A little	A little	Very slightly or not at all	A little	Very slightly or not at all	Very slightly or not at all	Very slightly or not at all	Very slightly or not at all		1	0	1	0	6	6	6	0	0
None	R_1M6OAfSEH3z3HgG									Strongly	Very Strongly	Very Strongly	Moderately	Slightly	Quite a bit	Very slightly or not at all	Moderately	Very slightly or not at all	Very slightly or not at all	Very slightly or not at all	Very slightly or not at all	A little	Very slightly or not at all	Quite a bit	Very slightly or not at all	Very slightly or not at all	Quite a bit	Very slightly or not at all	Moderately	Very slightly or not at all	A little	Extremely	Very slightly or not at all	Quite a bit	A little	Very slightly or not at all		2	0	5	5	3	7	7	3	15
James	R_2aLvF78LUYJ2ZMc	B	6	6	6	6	7	6	4	Strongly	Strongly	Moderately	Moderately	Moderately	Extremely	A little	Quite a bit	Very slightly or not at all	Very slightly or not at all	Very slightly or not at all	Very slightly or not at all	Very slightly or not at all	Very slightly or not at all	A little	Very slightly or not at all	Very slightly or not at all	Quite a bit	Very slightly or not at all	Very slightly or not at all	Very slightly or not at all	Very slightly or not at all	Quite a bit	A little	A little	Very slightly or not at all	A little		4	0	3	0	6	5	5	4	15
Steve	R_QnBK85NvEs9qU2R	C	Not at all (0)	Not at all (0)	2	1	Not at all (0)	Not at all (0)	1	Not at all	Strongly	Not at all	Not at all	Slightly	A little	A little	A little	Very slightly or not at all	Moderately	Moderately	A little	Moderately	Very slightly or not at all	Moderately	Quite a bit	Moderately	A little	A little	Moderately	A little	Moderately	Quite a bit	Very slightly or not at all	Very slightly or not at all	Very slightly or not at all	Quite a bit		6	0	6	0	1	7	8	5	10
None	R_21Am0iXTDfXFZQc									Strongly	Strongly	Strongly	Strongly	Moderately	Quite a bit	A little	Extremely	Moderately	Very slightly or not at all	A little	Very slightly or not at all	A little	Very slightly or not at all	Moderately	A little	A little	Moderately	Very slightly or not at all	Quite a bit	A little	A little	Quite a bit	A little	Moderately	A little	Very slightly or not at all		6	1	2	2	6	7	7	10	10
Steve	R_2Squ5Xh9gVUooYm	A	Not at all (0)	Not at all (0)	Not at all (0)	Not at all (0)	Not at all (0)	Not at all (0)	Not at all (0)	Slightly	Moderately	Moderately	Not at all	Not at all	A little	Very slightly or not at all	Very slightly or not at all	Very slightly or not at all	Very slightly or not at all	Very slightly or not at all	Very slightly or not at all	Very slightly or not at all	Very slightly or not at all	Very slightly or not at all	Very slightly or not at all	Very slightly or not at all	A little	Very slightly or not at all	Very slightly or not at all	Very slightly or not at all	Very slightly or not at all	Moderately	Very slightly or not at all	Moderately	Very slightly or not at all	Moderately		0	0	5	0	2	6	6	3	0
James	R_3hyDQUPa4AtUoW1	E	6	6	6	6	8	4	6	Moderately	Strongly	Strongly	Moderately	Moderately	Moderately	Very slightly or not at all	Moderately	Very slightly or not at all	Very slightly or not at all	A little	Very slightly or not at all	Very slightly or not at all	Very slightly or not at all	A little	Very slightly or not at all	Very slightly or not at all	A little	Very slightly or not at all	Very slightly or not at all	Very slightly or not at all	Very slightly or not at all	Moderately	Very slightly or not at all	Moderately	Very slightly or not at all	Very slightly or not at all		3	2	2	3	5	4	5	4	12
Steve	R_2c7byHzy1yCH1wN	E	6	6	7	7	4	8	6	Strongly	Strongly	Strongly	Strongly	Strongly	Quite a bit	A little	A little	Quite a bit	Very slightly or not at all	Very slightly or not at all	Very slightly or not at all	A little	Very slightly or not at all	A little	Very slightly or not at all	Very slightly or not at all	Moderately	Very slightly or not at all	Very slightly or not at all	A little	Very slightly or not at all	Quite a bit	A little	A little	A little	Very slightly or not at all		0	0	0	0	1	1	1	5	15
James	R_1IgG50MWAhigQ93	D	6	5	5	6	4	4	3	Moderately	Moderately	Moderately	Moderately	Strongly	Quite a bit	Very slightly or not at all	Quite a bit	A little	Very slightly or not at all	Quite a bit	Very slightly or not at all	Very slightly or not at all	Very slightly or not at all	Quite a bit	A little	Very slightly or not at all	Quite a bit	Very slightly or not at all	Moderately	A little	A little	Moderately	A little	Moderately	Very slightly or not at all	Quite a bit		6	2	3	3	4	6	7	3	10	100	100	100
None	R_3xDj76rri16ZHhL									Strongly	Very Strongly	Strongly	Moderately	Slightly	Quite a bit	Very slightly or not at all	Quite a bit	Very slightly or not at all	Very slightly or not at all	Very slightly or not at all	Very slightly or not at all	Very slightly or not at all	Very slightly or not at all	Moderately	A little	Very slightly or not at all	Moderately	Very slightly or not at all	A little	Very slightly or not at all	Moderately	Quite a bit	A little	Moderately	Very slightly or not at all	Moderately		6	0	6	0	6	6	7	6	14
None	R_1n0fsQ5lQY7wTVk									Very Strongly	Very Strongly	Strongly	Slightly	Very Strongly	Extremely	Very slightly or not at all	A little	Very slightly or not at all	Very slightly or not at all	A little	Very slightly or not at all	Very slightly or not at all	Very slightly or not at all	Very slightly or not at all	Very slightly or not at all	Very slightly or not at all	A little	Very slightly or not at all	Very slightly or not at all	Very slightly or not at all	Very slightly or not at all	Quite a bit	A little	Very slightly or not at all	Very slightly or not at all	Moderately		8	0	9	0	9	6	8	8	10
Steve	R_3snMIgXwNSNg6Xv	C	5	7	5	6	8	5	4	Very Strongly	Very Strongly	Strongly	Moderately	Moderately	Quite a bit	Very slightly or not at all	Moderately	Very slightly or not at all	Very slightly or not at all	Moderately	Very slightly or not at all	Very slightly or not at all	Very slightly or not at all	A little	Moderately	Very slightly or not at all	Quite a bit	Very slightly or not at all	Moderately	A little	Quite a bit	Quite a bit	Very slightly or not at all	Quite a bit	Very slightly or not at all	A little		5	3	2	0	1	1	2	2	0
James	R_AgjhflQGFFrlcZP	A	3	4	2	5	4	4	Not at all (0)	Moderately	Moderately	Moderately	Slightly	Moderately	Quite a bit	Very slightly or not at all	Moderately	A little	Very slightly or not at all	A little	Very slightly or not at all	Very slightly or not at all	Very slightly or not at all	A little	A little	Very slightly or not at all	Moderately	Very slightly or not at all	Moderately	Very slightly or not at all	A little	Quite a bit	Very slightly or not at all	A little	Very slightly or not at all	A little		2	0	0	0	3	2	0	4	5
None	R_1EWqXlALUTuBqk2									Very Strongly	Strongly	Strongly	Strongly	Moderately	Extremely	Very slightly or not at all	Extremely	Moderately	Very slightly or not at all	Moderately	Very slightly or not at all	Very slightly or not at all	Very slightly or not at all	Extremely	Moderately	Very slightly or not at all	Moderately	Very slightly or not at all	Moderately	Very slightly or not at all	Very slightly or not at all	Moderately	Very slightly or not at all	Moderately	Very slightly or not at all	Very slightly or not at all		5	0	5	0	5	5	5	4	10
Steve	R_PLk0Y9IXnuciHJf	B	1	7	6	6	6	7	2	Moderately	Moderately	Moderately	Moderately	Strongly	Quite a bit	Very slightly or not at all	Moderately	Very slightly or not at all	Very slightly or not at all	A little	Very slightly or not at all	Very slightly or not at all	Very slightly or not at all	Moderately	Moderately	Very slightly or not at all	Quite a bit	Very slightly or not at all	Very slightly or not at all	Very slightly or not at all	A little	Quite a bit	Very slightly or not at all	Quite a bit	Very slightly or not at all	Quite a bit		2	0	2	0	2	2	2	10	15
Steve	R_2CO3P3gdbORzOjN	E	3	5	3	6	7	8	5	Very Strongly	Very Strongly	Very Strongly	Moderately	Moderately	Quite a bit	Very slightly or not at all	Quite a bit	Moderately	Very slightly or not at all	Very slightly or not at all	Very slightly or not at all	Very slightly or not at all	Very slightly or not at all	A little	A little	Very slightly or not at all	Moderately	Very slightly or not at all	Moderately	Very slightly or not at all	A little	Extremely	Very slightly or not at all	A little	Very slightly or not at all	Very slightly or not at all		5	5	0	0	7	3	7	6	0
None	R_2f0TDlrFiLum8xY									Very Strongly	Very Strongly	Very Strongly	Strongly	Moderately	Quite a bit	A little	Quite a bit	Very slightly or not at all	Very slightly or not at all	A little	Very slightly or not at all	Very slightly or not at all	Very slightly or not at all	Moderately	A little	Very slightly or not at all	Extremely	Very slightly or not at all	Moderately	A little	Quite a bit	Quite a bit	Moderately	Moderately	Very slightly or not at all	A little		6	0	0	0	3	5	3	10	10
Steve	R_2XolfpktqCkk58F	B	3	8	6	7	7	7	4	Very Strongly	Very Strongly	Strongly	Strongly	Strongly	Quite a bit	Very slightly or not at all	Quite a bit	A little	Very slightly or not at all	Moderately	Very slightly or not at all	Very slightly or not at all	Very slightly or not at all	Quite a bit	Moderately	Very slightly or not at all	Quite a bit	Very slightly or not at all	Quite a bit	A little	Moderately	Quite a bit	Moderately	Moderately	Very slightly or not at all	Moderately		6	0	6	0	5	3	6	5	10
[truncated: 26 more columns]
