# Supplementary material for: Virtual reality perspective-taking increases cognitive empathy for specific others
Source: PLoS One. 2018 Aug 30;13(8):e0202442. doi: 10.1371/journal.pone.0202442 (PMC6116942; doi:10.1371/journal.pone.0202442)
Supplement: S3 File — A .xlsx file with the CTG data described in the paper. (XLSX) [file pone.0202442.s007.xlsx]

## Sheet: CTG
ParticipantID	milliseconds
R_2YWbpeR8KNmrk13	44244
IMPORTANT DO NOT SCRUB She didn't do the booking and closed the link but we have her data Adriana 1:30PM Wednesday 7 June 2017	45165
Katie Test Game Theory Games	40676
R_032W69C4pnog9IB	48857
R_0Dv0ze3v3ssjRn3	43392
R_1CyFOyQvNmaC8XD	41064
R_1EWqXlALUTuBqk2	43983
R_1FFKetjiKqIHnHU	43148
R_1Fstlwi4WrcGmsj	21900
R_1H2DA5LKQy16xil	44500
R_1IT13m3iqkerSPG	39862
R_1IgG50MWAhigQ93	36111
R_1IyMsvmlSCSzj6N	44279
R_1JF57Pt6KpQ3J0n	39184
R_1K8Uf5mNkW4yAqg	48305
R_1Krna2FaNfSGDSY	38654
R_1M6OAfSEH3z3HgG	42470
R_1NDG73EpI8id6K5	46049
R_1Nmrt6JzdBu8JW1	38159
R_1OBvbTfTgfWpU1k	45446
R_1OJ0xj8TDpTxPp6	41942
R_1QJAMsA9FOnUAyS	45898
R_1QlPW43jjaFm6EM	45344
R_1cU0u1OYrgjQZse	45565
R_1f6FD7XPp1BDp0e	49511
R_1gBK5BH9appPQda	40934
R_1gi0kE0KTJYXylF	41509
R_1hGSnhawH8veQ1m	45950
R_1hSB3c0tvWvXS6F	41767
R_1j9UkkzEQiakALK	44916
R_1l641sAnHzAqVS3	47181
R_1loOTw1ltapndhW	40885
R_1mCP4H87jw9xIdx	48137
R_1mQL04yHKnYOOs8	43879
R_1mfNysUEQ0TMtBi	45947
R_1mkofeFPvjEejGJ	40442
R_1mwn6ZANoFTYRyO	48939
R_1n0C8jDvL5LipoM	50145
R_1n0fsQ5lQY7wTVk	43766
R_1oGt7QNAvkJjl3E	45581
R_1pyWwbBfD3S7Pne	47662
R_1pyhq3kxciz2UD4	45122
R_1rCZeaJeXFHWQBi	40319
R_1rDOkiEG7VZGfin	46777
R_20NZuJI0WXSMlao	41938
R_21Am0iXTDfXFZQc	43497
R_21oIWDE6fBJ8S85	49025
R_21oLvcBtXpTRVvX	40262
R_23dDQnoQ9k56O4z	47676
R_24eNqBp2RycoPqP	47024
R_24obAZEaI3BjeTz	42906
R_25KI1oQ6Of4pmw2	49785
R_27CDYJxbevgrMjJ	43149
R_27QcJnZTHEZdVqc	48442
R_27UtmaQz72JI6bh	45850
R_29soKcCQ1lHWQXk	46562
R_2A0Z5gB1XgQ7OVz	47628
R_2BnwKWIjVXyH9j2	41145
R_2CO3P3gdbORzOjN	45719
R_2CTiRmewXTeUW9J	31702
R_2D0ove9toKig0C6	42064
R_2EAzOyuUx0TSATL	48202
R_2P67Lqg3SuuVgVr	45663
R_2PnYlvqi6my1tjz	45424
R_2PzC7GFA8j85dPV	32892
R_2Slf8ZHeHMqyu73	50419
R_2Squ5Xh9gVUooYm	35997
R_2SxknICHYajLLAl	43963
R_2TTyN7TGDiOrgbK	43827
R_2WBiSqAt6b64lXf	39483
R_2XolfpktqCkk58F	46196
R_2Y99YDf3G5EWjJh	48854
R_2Ynx89z5HvdaOSj	48283
R_2ZWAFZXHiTKMG5D	45302
R_2aEMCzAEnCfwKtK	47758
R_2aLvF78LUYJ2ZMc	46165
R_2akR2kSTMUU0gkq	50519
R_2ammP9yoJrRgnU2	46894
R_2c7byHzy1yCH1wN	45395
R_2cpWM3XrbHPtkJv	45838
R_2ctF8J3sAVLqxR2	45532
R_2dLztQh65IOz688	44387
R_2f0TDlrFiLum8xY	42933
R_2f2piXUBBflYdHz	46068
R_2q7yjET9oyvAqPu	43624
R_2rDiyU2ptHiQcqt	44208
R_2rYqdXAxAoUKkt6	34851
R_2uBZEPkFktiuvQa	43476
R_2uUmr56yoitjLru	39244
R_2w7AXn5cPKQ8c1v	44291
R_2wzspZbWFLnmRhV	38643
R_2xMpOPdVuDCIs35	43910
R_2y89OLPsMtTwY6v	43731
R_2zc1JsblggbYKFM	46193
R_2ziQnFPrOWqm3fm	41763
R_30818pZazWXT3P	34870
R_31dh6dkAIj7SOD8	45495
R_31sze9OStdvvt2K	43446
R_3D0fvESd6LYsA8S	45298
R_3DcFraHTdwbJxf8	46842
R_3EGYUqdLEEoaUxo	46210
R_3EcnNt1NHaqbC0p	40525
R_3EiMcWq3kcnWy0H	44926
R_3G0QZugGC2PNGb9	37948
R_3GuF1CnjADQ4th6	44738
R_3JlNTdafomti48q	41288
R_3JnqwBFQMTzO0de	42699
R_3JsYGpf4eHrBzt1	46887
R_3KGChv3UPpNIqHp	46366
R_3KOOsgwJjER8r3f	46949
R_3M068zX7AzD3Heu	45489
R_3MagQxD45PrRIQj	42252
R_3MhQeHvBFZI5g1S	49096
R_3OibPYpvbhB9NfZ	41660
R_3e9oiKtncXu8de4	48227
R_3f0QazZAR5NmtZn	45164
R_3gUuhz8ukeQjeaX	40912
R_3h3o7eUyG0NB8tR	44898
R_3hyDQUPa4AtUoW1	28482
R_3iQhrTFuENBeink	42291
R_3jV5iB6ThikN9ZF	41282
R_3kNRBOVNGv7xTkn	42294
R_3kdfg6lkcrzedDZ	39390
R_3lEA7Dn0P8QgCv4	43666
R_3nc3jmxNveNeeQh	38513
R_3njiF9sXbI4Ty0w	40885
R_3qx0g7iBPj98pX2	19918
R_3snMIgXwNSNg6Xv	46679
R_3xDj76rri16ZHhL	45413
R_4U75rCoCPiX4ecx	45973
R_6ogQhinNMWyMi8V	39453
R_8BRBLYwzYwHEwg1	46854
R_9L9HW0A8O8IfoBP	35065
R_9RXRVR8MmsyZQhH	28596
R_9ZZhv7Hc3nyIqOJ	44390
R_9vgFSpHDW5oHMcx	47226
R_AgjhflQGFFrlcZP	45282
R_ApnbgzdqvqyDAKR	45820
R_BFaqWxVaDJ9dNKx	43609
R_BunHSTFEOQYRMXL	47546
R_O8e63FbsRh7sAW5	43891
R_Oa34lataLl72zKx	46194
R_PLk0Y9IXnuciHJf	44290
R_PuN8nZdls2YYL61	40724
R_QcW3snLw8RdEOn7	43094
R_QnBK85NvEs9qU2R	42112
R_R3rztU8vojNaFAl	47429
R_TtkowkBk77RTCdr	36442
R_TuvWj7drWA0sXMB	43325
R_Twkg47qaYhDgLAd	41636
R_UbgQ4VEK9hZMSgF	40537
R_UuLMuNY3ELzEWfT	45717
R_VW6iD1JhOxFQ7e1	46320
R_WoBdrmUMFfw3oQh	47605
R_WpnlQ7T5iw2Y0JH	44300
R_XLcVSs3YRMfhXvX	45998
R_XiIX5JvFabYNLMt	38953
R_Xk7bToHAEmSz8Qh	41048
R_YSSiS8g6wZu1vUd	37516
R_YbsHTrHxqVaSaCB	43014
R_ZErIpxPf45hIcHD	44138
R_ZsnQbcLqLIxMEZr	44696
R_aWxu7unKjucC6zL	45582
R_b89TRzlde4my9yx	45079
R_cOMzJXmO1Nd3gC5	39995
R_cVoSAW5a7hfDJOF	47663
R_p3CU0hHHTluZCxz	43458
R_pKsM4FOBpLdbbjP	41584
R_pshBFBd3iNDe3L3	43751
R_qCQqllbEvPeMgX7	42327
R_qznNXTTo4OhWCA1	38339
R_sAMM2IfScVEnCtb	32034
R_sBZFyouR4OWKwyB	44453
R_sEWynhbZ6BVTQCl	35886
R_sFLS6MgbdUngJ3P	41757
R_shPplcAOL7fhyPD	45429
R_szJwQmxh5szzza1	38668
R_t06wmHBrnfVXmZr	40348
R_tLjdG6LOTCig8zn	35859
R_tQkhDmTVjIyuox3	42612
R_vGZiSUZHFEyHjz3	47541
R_vepL2uaV4fFOoyl	45454
R_wSmATAfilRuLOet	45008
R_xxfsmSfglC3EZVv	41440
R_yL6wcowtX9P2jMB	51317
R_ysts4djUfPyh9G9	43102
R_zYB6SeL8nJWH33z	32290
Unknown1	41898
Unknown2	38186
