# Supplementary material for: Virtual reality perspective-taking increases cognitive empathy for specific others
Source: PLoS One. 2018 Aug 30;13(8):e0202442. doi: 10.1371/journal.pone.0202442 (PMC6116942; doi:10.1371/journal.pone.0202442)
Supplement: S5 File — A file that can be uploaded to Qualtrics to exactly re-create the questionnaire used in the post-treatment experiment described in the paper. (QSF) [file pone.0202442.s009.qsf]

{"SurveyEntry":{"SurveyID":"SV_1NbeoeO3uH7Y1dH","SurveyName":"DARPA_Pre-Screen Updated 24 April 2017","SurveyDescription":null,"SurveyOwnerID":"UR_2uwU5r1LSzzlXc9","SurveyBrandID":"stanforduniversity","DivisionID":null,"SurveyLanguage":"EN","SurveyActiveResponseSet":"RS_3xfKYrNXtg411Hv","SurveyStatus":"Inactive","SurveyStartDate":"0000-00-00 00:00:00","SurveyExpirationDate":"0000-00-00 00:00:00","SurveyCreationDate":"2017-04-24 15:34:24","CreatorID":"UR_2uwU5r1LSzzlXc9","LastModified":"2017-09-22 16:54:19","LastAccessed":"0000-00-00 00:00:00","LastActivated":"2017-05-04 19:18:18","Deleted":null},"SurveyElements":[{"SurveyID":"SV_1NbeoeO3uH7Y1dH","Element":"BL","PrimaryAttribute":"Survey Blocks","SecondaryAttribute":null,"TertiaryAttribute":null,"Payload":{"0":{"Type":"Default","Description":"Demographics","ID":"BL_3ReFsvcmhJ9S0gB","BlockElements":[{"Type":"Question","QuestionID":"QID1"},{"Type":"Question","QuestionID":"QID2"},{"Type":"Page Break"},{"Type":"Question","QuestionID":"QID3"},{"Type":"Question","QuestionID":"QID4"},{"Type":"Page Break"},{"Type":"Question","QuestionID":"QID78"}]},"1":{"Type":"Trash","Description":"Trash \/ Unused Questions","ID":"BL_0vPz5DT1Uz7UZUN","BlockElements":[{"Type":"Question","QuestionID":"QID21"},{"Type":"Question","QuestionID":"QID22"},{"Type":"Question","QuestionID":"QID24"},{"Type":"Question","QuestionID":"QID16"},{"Type":"Question","QuestionID":"QID17"},{"Type":"Question","QuestionID":"QID18"},{"Type":"Question","QuestionID":"QID40"},{"Type":"Question","QuestionID":"QID53"},{"Type":"Question","QuestionID":"QID48"},{"Type":"Question","QuestionID":"QID49"},{"Type":"Question","QuestionID":"QID47"},{"Type":"Question","QuestionID":"QID45"},{"Type":"Question","QuestionID":"QID54"},{"Type":"Question","QuestionID":"QID64"},{"Type":"Question","QuestionID":"QID66"},{"Type":"Question","QuestionID":"QID52"},{"Type":"Question","QuestionID":"QID65"},{"Type":"Question","QuestionID":"QID67"},{"Type":"Question","QuestionID":"QID73"}]},"2":{"Type":"Standard","SubType":"","Description":"SVO","ID":"BL_eh2kCQe7vcibG5v","BlockElements":[{"Type":"Question","QuestionID":"QID5"},{"Type":"Question","QuestionID":"QID6"},{"Type":"Page Break"},{"Type":"Question","QuestionID":"QID7"},{"Type":"Page Break"},{"Type":"Question","QuestionID":"QID8"},{"Type":"Page Break"},{"Type":"Question","QuestionID":"QID9"},{"Type":"Page Break"},{"Type":"Question","QuestionID":"QID10"},{"Type":"Page Break"},{"Type":"Question","QuestionID":"QID11"},{"Type":"Page Break"},{"Type":"Question","QuestionID":"QID12"},{"Type":"Page Break"},{"Type":"Question","QuestionID":"QID13"},{"Type":"Page Break"},{"Type":"Question","QuestionID":"QID14"}]},"3":{"Type":"Standard","SubType":"","Description":"Information for VR World","ID":"BL_1HSPNTjtOqHHYuV","BlockElements":[{"Type":"Question","QuestionID":"QID15"},{"Type":"Page Break"},{"Type":"Question","QuestionID":"QID32"},{"Type":"Page Break"},{"Type":"Question","QuestionID":"QID33"},{"Type":"Page Break"},{"Type":"Question","QuestionID":"QID31"},{"Type":"Page Break"},{"Type":"Question","QuestionID":"QID34"},{"Type":"Page Break"},{"Type":"Question","QuestionID":"QID36"},{"Type":"Page Break"},{"Type":"Question","QuestionID":"QID35"},{"Type":"Question","QuestionID":"QID74"},{"Type":"Question","QuestionID":"QID75"},{"Type":"Page Break"},{"Type":"Question","QuestionID":"QID37"},{"Type":"Page Break"},{"Type":"Question","QuestionID":"QID38"},{"Type":"Question","QuestionID":"QID76"},{"Type":"Page Break"},{"Type":"Question","QuestionID":"QID39"},{"Type":"Question","QuestionID":"QID77"},{"Type":"Question","QuestionID":"QID70"},{"Type":"Page Break"},{"Type":"Question","QuestionID":"QID41"},{"Type":"Page Break"},{"Type":"Question","QuestionID":"QID42"},{"Type":"Page Break"},{"Type":"Question","QuestionID":"QID43"},{"Type":"Page Break"},{"Type":"Question","QuestionID":"QID44"},{"Type":"Page Break"},{"Type":"Question","QuestionID":"QID56"},{"Type":"Page Break"},{"Type":"Question","QuestionID":"QID57"},{"Type":"Page Break"},{"Type":"Question","QuestionID":"QID58"},{"Type":"Page Break"},{"Type":"Question","QuestionID":"QID59"},{"Type":"Page Break"},{"Type":"Question","QuestionID":"QID60"},{"Type":"Page Break"},{"Type":"Question","QuestionID":"QID61"},{"Type":"Page Break"},{"Type":"Question","QuestionID":"QID62"},{"Type":"Page Break"},{"Type":"Question","QuestionID":"QID63"},{"Type":"Page Break"},{"Type":"Question","QuestionID":"QID50"},{"Type":"Page Break"},{"Type":"Question","QuestionID":"QID46"},{"Type":"Page Break"},{"Type":"Question","QuestionID":"QID55"},{"Type":"Page Break"},{"Type":"Question","QuestionID":"QID51"},{"Type":"Page Break"}]},"4":{"Type":"Standard","SubType":"","Description":"NEO Altruism","ID":"BL_9nSqjzABMUeFmBv","BlockElements":[{"Type":"Question","QuestionID":"QID19"},{"Type":"Page Break"},{"Type":"Question","QuestionID":"QID25"}]},"5":{"Type":"Standard","SubType":"","Description":"Philosophies of Human Nature -- Trustworthiness","ID":"BL_0lCNK08QUGe5T93","BlockElements":[{"Type":"Question","QuestionID":"QID20"},{"Type":"Page Break"},{"Type":"Question","QuestionID":"QID26"},{"Type":"Page Break"},{"Type":"Question","QuestionID":"QID27"},{"Type":"Page Break"},{"Type":"Question","QuestionID":"QID28"},{"Type":"Page Break"},{"Type":"Question","QuestionID":"QID29"}]},"6":{"Type":"Standard","SubType":"","Description":"Block 5","ID":"BL_0OHsVDS6XkXnDQp","BlockElements":[{"Type":"Question","QuestionID":"QID23"},{"Type":"Page Break"},{"Type":"Question","QuestionID":"QID30"}]},"8":{"Type":"Standard","SubType":"","Description":"Informed Consent","ID":"BL_bvLb9bSOJPoM66p","BlockElements":[{"Type":"Question","QuestionID":"QID69"},{"Type":"Question","QuestionID":"QID68"}]},"9":{"Type":"Standard","SubType":"","Description":"Block 7","ID":"BL_9tUmOvGODxyIiEZ","BlockElements":[{"Type":"Question","QuestionID":"QID72"},{"Type":"Question","QuestionID":"QID71"}]}}},{"SurveyID":"SV_1NbeoeO3uH7Y1dH","Element":"FL","PrimaryAttribute":"Survey Flow","SecondaryAttribute":null,"TertiaryAttribute":null,"Payload":{"Type":"Root","FlowID":"FL_1","Flow":[{"Type":"Standard","ID":"BL_bvLb9bSOJPoM66p","FlowID":"FL_10"},{"Type":"Block","ID":"BL_3ReFsvcmhJ9S0gB","FlowID":"FL_2"},{"Type":"Standard","ID":"BL_eh2kCQe7vcibG5v","FlowID":"FL_3"},{"Type":"Standard","ID":"BL_9nSqjzABMUeFmBv","FlowID":"FL_5"},{"Type":"Standard","ID":"BL_0lCNK08QUGe5T93","FlowID":"FL_6"},{"Type":"Standard","ID":"BL_0OHsVDS6XkXnDQp","FlowID":"FL_8"},{"Type":"Standard","ID":"BL_1HSPNTjtOqHHYuV","FlowID":"FL_4"},{"Type":"Standard","ID":"BL_9tUmOvGODxyIiEZ","FlowID":"FL_16"},{"Type":"EmbeddedData","FlowID":"FL_17","EmbeddedData":[{"Description":"id","Type":"Recipient","Field":"id","VariableType":"Nominal"}]},{"Type":"EndSurvey","FlowID":"FL_18"}],"Properties":{"Count":18}}},{"SurveyID":"SV_1NbeoeO3uH7Y1dH","Element":"SO","PrimaryAttribute":"Survey Options","SecondaryAttribute":null,"TertiaryAttribute":null,"Payload":{"BackButton":"false","SaveAndContinue":"true","SurveyProtection":"PublicSurvey","BallotBoxStuffingPrevention":"false","NoIndex":"Yes","SecureResponseFiles":"true","SurveyExpiration":null,"SurveyTermination":"DisplayMessage","Header":"","Footer":"","ProgressBarDisplay":"NoText","PartialData":"+1 week","ValidationMessage":null,"PreviousButton":"  <<  ","NextButton":"  >>  ","SkinLibrary":"Qualtrics","SkinType":"MQ","Skin":"msmonochrome","NewScoring":1,"EOSMessage":"MS_8c512PPquJVg8zb","ShowExportTags":"false","CollectGeoLocation":"false","SurveyTitle":"Online Survey Software | Qualtrics Survey Solutions","SurveyMetaDescription":"Qualtrics sophisticated online survey software solutions make creating online surveys easy. Learn more about Research Suite and get a free account today.","PasswordProtection":"No","AnonymizeResponse":"No","Password":"","RefererCheck":"No","RefererURL":"http:\/\/","EOSMessageLibrary":"UR_b78kkwcOgghIqcl","EOSRedirectURL":"https:\/\/","EmailThankYou":"false","ThankYouEmailMessageLibrary":null,"ThankYouEmailMessage":null,"ValidateMessage":"false","ValidationMessageLibrary":null,"InactiveSurvey":"DefaultMessage","PartialDataCloseAfter":"LastActivity","InactiveMessageLibrary":"","InactiveMessage":"","ActiveResponseSet":null,"AvailableLanguages":{"EN":[]},"libraryId":"","nextButtonMid":"","previousButtonMid":"","headerMid":"","footerMid":"","QuestionsPerPage":"","PageTransition":"None","ExternalCSS":null,"CustomStyles":{"errorStyles":{"selector":".Skin .ValidationError","styles":{"color":null,"backgroundColor":null,"borderColor":null}},"errorStylesBG":{"selector":".Skin .HeaderValidationError, .Skin .HeaderValidationError li a","styles":{"color":null,"backgroundColor":null}},"pageStyles":{"selector":"#SurveyEngineBody","styles":{"backgroundColor":null}},"textStyles":{"selector":".SkinInner","styles":{"fontFamily":null,"fontSize":null,"fontWeight":null,"fontStyle":null,"textDecoration":null,"color":null}},"questionStyles":{"selector":".Skin .QuestionText","styles":{"fontFamily":null,"fontSize":null,"fontWeight":null,"fontStyle":null,"textDecoration":null,"color":null}},"choiceStyles":{"selector":".Skin .horizontalbar th.ylabel, .Skin .Matrix table td, .Skin .Matrix table th, .Skin .Matrix table thead th, .Skin .Matrix table thead td, .Skin .PGR .DragAndDrop .Items label, .Skin .QuestionBody ul.ChoiceStructure, .Skin .PGR .DragAndDrop .Group ul, .Skin .PGR .DragAndDrop .Group h2, .Skin .PGR .DragAndDrop .Items ul, .Skin .PGR .DragAndDrop .Items h2, .Skin .DD .QuestionBody table.ChoiceStructure, .Skin .PGR .DragAndDrop .NoColumns td.groupsContainerTd div ul, .Skin .PGR .DragAndDrop .NoColumns td.groupsContainerTd div h2, .Skin .SBS thead th, .Skin .SBS td, .Skin .SBS .Answers td, .Skin .SBS .Answers th, .SBS table.ChoiceStructure, .Skin .horizontalbar thead table.LabelDescriptions tr td, .Skin .horizontalbar thead tr td.NotApplicable, .QuestionBody th, .Skin .QuestionBody .MC .MAVR label, .Skin .QuestionBody .MC .SAVR label, .Skin .SBS thead th, .Skin .SBS td, .Skin .RO .DND ul li, .Skin .reg, .SkinInner .ChoiceStructure, .Skin thead, .Skin .GAP .ChoiceStructure thead th, .Skin .GAP .ChoiceStructure .c4, .Skin .GAP .ChoiceStructure th, .Skin .GAP .ChoiceStructure .WhyText, .SkinInner .ChoiceStructure .LightBG, .Skin .QuestionOuter.Highlight .Inner .reg, .Skin .QuestionOuter.Highlight .Inner .alt, .Skin .QuestionOuter.Highlight .Inner .ReadableAlt       ","styles":{"fontFamily":null,"fontSize":null,"fontWeight":null,"fontStyle":null,"textDecoration":null,"color":null}},"headerStyles":{"selector":".Skin div#Header","styles":{"color":null}},"footerStyles":{"selector":".Skin #Footer","styles":{"color":null}},"questionSeparatorStyles":{"selector":".Skin .Separator","styles":{"backgroundColor":null,"display":null}},"highlightStyles":{"selector":".Skin .QuestionOuter.Highlight .Inner, .Skin .QuestionOuter.Highlight .Inner .reg, .Skin .QuestionOuter.Highlight .Inner .alt, .Skin .QuestionOuter.Highlight .Inner .ReadableAlt","styles":{"backgroundColor":null}},"highlightStylesAlt":{"selector":".Skin .QuestionOuter.Highlight .Inner .ReadableAlt, .Skin .QuestionOuter.Highlight .Inner .LightBG","styles":{"backgroundColor":null}},"textEntryStyles":{"selector":".Skin select, .Skin .InputText","styles":{"color":null}},"borderStyles":{"selector":".Skin .CS .horizontalbar table.sliderGrid tr.xlabel th, .Skin .CS .horizontalbar .ylabel, .Skin .CS .horizontalbar table.sliderGrid tr td.value, .Skin .Slider .horizontalbar table.sliderGrid tr.xlabel th, .Skin .BorderColor, .Skin .DarkBorderColor, .Skin .Slider .horizontalbar table.sliderGrid tr td.value, .Skin thead, .Skin .GAP .ChoiceStructure thead th  ","styles":{"borderColor":null}},"altRowStyles":{"selector":".Skin .ReadableAlt, .Skin .LightBG","styles":{"backgroundColor":null}},"customCSS":null},"HighlightQuestions":"off"}},{"SurveyID":"SV_1NbeoeO3uH7Y1dH","Element":"SQ","PrimaryAttribute":"QID71","SecondaryAttribute":null,"TertiaryAttribute":null,"Payload":{"QuestionText":"<iframe src=\"https:\/\/vrptstudy1.youcanbook.me\/?noframe=true&skipHeaderFooter=true\" id=\"ycbmiframevrptstudy1\" style=\"width:100%;height:1000px;border:0px;background-color:transparent;\" frameborder=\"0\" allowtransparency=\"true\"><\/iframe><script>window.addEventListener && window.addEventListener(\"message\", function(event){if (event.origin === \"https:\/\/vrptstudy1.youcanbook.me\"){document.getElementById(\"ycbmiframevrptstudy1\").style.height = event.data + \"px\";}}, false);<\/script>","DefaultChoices":false,"DataExportTag":"Q71","QuestionID":"QID71","QuestionType":"DB","Selector":"TB","Configuration":{"QuestionDescriptionOption":"UseText"},"ChoiceOrder":[],"Validation":{"Settings":{"Type":"None"}},"GradingData":[],"Language":[]}},{"SurveyID":"SV_1NbeoeO3uH7Y1dH","Element":"SCO","PrimaryAttribute":"Scoring","SecondaryAttribute":null,"TertiaryAttribute":null,"Payload":{"ScoringCategories":[],"ScoringCategoryGroups":[],"ScoringSummaryCategory":null,"ScoringSummaryAfterQuestions":0,"ScoringSummaryAfterSurvey":0,"DefaultScoringCategory":null,"AutoScoringCategory":null}},{"SurveyID":"SV_1NbeoeO3uH7Y1dH","Element":"STAT","PrimaryAttribute":"Survey Statistics","SecondaryAttribute":null,"TertiaryAttribute":null,"Payload":{"MobileCompatible":true,"ID":"Survey Statistics"}},{"SurveyID":"SV_1NbeoeO3uH7Y1dH","Element":"QC","PrimaryAttribute":"Survey Question Count","SecondaryAttribute":"78","TertiaryAttribute":null,"Payload":null},{"SurveyID":"SV_1NbeoeO3uH7Y1dH","Element":"SQ","PrimaryAttribute":"QID78","SecondaryAttribute":"Are you a Stanford student?","TertiaryAttribute":null,"Payload":{"QuestionText":"Are you a Stanford student?","DataExportTag":"Q78","QuestionType":"MC","Selector":"SAVR","SubSelector":"TX","Configuration":{"QuestionDescriptionOption":"UseText"},"QuestionDescription":"Are you a Stanford student?","Choices":{"1":{"Display":"Yes"},"2":{"Display":"No"}},"ChoiceOrder":["1","2"],"Validation":{"Settings":{"ForceResponse":"OFF","ForceResponseType":"ON","Type":"None"}},"Language":[],"QuestionID":"QID78"}},{"SurveyID":"SV_1NbeoeO3uH7Y1dH","Element":"SQ","PrimaryAttribute":"QID48","SecondaryAttribute":"Are you in college currently? If so, what major are you enrolled as?","TertiaryAttribute":null,"Payload":{"QuestionText":"Are you in college currently? If so, what major are you enrolled as?","DefaultChoices":false,"DataExportTag":"Q48","QuestionID":"QID48","QuestionType":"TE","Selector":"SL","Configuration":{"QuestionDescriptionOption":"UseText"},"QuestionDescription":"Are you in college currently? If so, what major are you enrolled as?","Validation":{"Settings":{"ForceResponse":"OFF","ForceResponseType":"ON","Type":"None"}},"GradingData":[],"Language":[]}},{"SurveyID":"SV_1NbeoeO3uH7Y1dH","Element":"SQ","PrimaryAttribute":"QID54","SecondaryAttribute":"Are you or have you ever been affiliated with Stanford University?","TertiaryAttribute":null,"Payload":{"QuestionText":"Are you or have you ever been affiliated with Stanford University?","DataExportTag":"Q54","QuestionType":"MC","Selector":"SAVR","SubSelector":"TX","Configuration":{"QuestionDescriptionOption":"UseText"},"QuestionDescription":"Are you or have you ever been affiliated with Stanford University?","Choices":{"1":{"Display":"Current Student"},"2":{"Display":"Alumnus"},"3":{"Display":"Faculty"},"4":{"Display":"Staff"},"5":{"Display":"No, I am not and have never been affiliated with Stanford University"}},"ChoiceOrder":["1","2","3","4","5"],"Validation":{"Settings":{"ForceResponse":"OFF","ForceResponseType":"ON","Type":"None"}},"Language":[],"QuestionID":"QID54"}},{"SurveyID":"SV_1NbeoeO3uH7Y1dH","Element":"SQ","PrimaryAttribute":"QID19","SecondaryAttribute":"Choose the option that best describes your attitude:","TertiaryAttribute":null,"Payload":{"QuestionText":"Choose the option that best describes your attitude:","DefaultChoices":false,"DataExportTag":"Q19","QuestionType":"Matrix","Selector":"Likert","SubSelector":"SingleAnswer","Configuration":{"QuestionDescriptionOption":"UseText","TextPosition":"inline","ChoiceColumnWidth":25,"RepeatHeaders":"none","WhiteSpace":"OFF","MobileFirst":true},"QuestionDescription":"Choose the option that best describes your attitude:","Choices":{"1":{"Display":"Some people think I'm selfish."},"2":{"Display":"I try to be courteous to everyone I meet."},"3":{"Display":"Some people think of me as calculating."},"4":{"Display":"I generally try to be considerate."}},"ChoiceOrder":[1,2,3,4],"Validation":{"Settings":{"ForceResponse":"ON","ForceResponseType":"ON","Type":"None"}},"GradingData":[],"Language":[],"Answers":{"1":{"Display":"Strongly disagree"},"2":{"Display":"Disagree"},"3":{"Display":"Neutral"},"4":{"Display":"Agree"},"5":{"Display":"Strongly agree"}},"AnswerOrder":[1,2,3,4,5],"ChoiceDataExportTags":false,"QuestionID":"QID19"}},{"SurveyID":"SV_1NbeoeO3uH7Y1dH","Element":"SQ","PrimaryAttribute":"QID25","SecondaryAttribute":"Choose the option that best describes your attitude:","TertiaryAttribute":null,"Payload":{"QuestionText":"Choose the option that best describes your attitude:","DefaultChoices":false,"DataExportTag":"Q25","QuestionType":"Matrix","Selector":"Likert","SubSelector":"SingleAnswer","Configuration":{"QuestionDescriptionOption":"UseText","TextPosition":"inline","ChoiceColumnWidth":25,"RepeatHeaders":"none","WhiteSpace":"OFF","MobileFirst":true},"QuestionDescription":"Choose the option that best describes your attitude:","Choices":{"1":{"Display":"I'm not known for my generosity."},"2":{"Display":"Most people I know like me."},"3":{"Display":"I think of myself as a charitable person."},"4":{"Display":"I go out of my way to help others if I can."}},"ChoiceOrder":[1,2,3,4],"Validation":{"Settings":{"ForceResponse":"ON","ForceResponseType":"ON","Type":"None"}},"GradingData":[],"Language":[],"Answers":{"1":{"Display":"Strongly disagree"},"2":{"Display":"Disagree"},"3":{"Display":"Neutral"},"4":{"Display":"Agree"},"5":{"Display":"Strongly agree"}},"AnswerOrder":[1,2,3,4,5],"ChoiceDataExportTags":false,"QuestionID":"QID25"}},{"SurveyID":"SV_1NbeoeO3uH7Y1dH","Element":"SQ","PrimaryAttribute":"QID21","SecondaryAttribute":"Click to write the question text","TertiaryAttribute":null,"Payload":{"QuestionText":"Click to write the question text","DefaultChoices":false,"DataExportTag":"Q21","QuestionType":"DB","Selector":"TB","Configuration":{"QuestionDescriptionOption":"UseText"},"QuestionDescription":"Click to write the question text","ChoiceOrder":[],"Validation":{"Settings":{"Type":"None"}},"GradingData":[],"Language":[],"QuestionID":"QID21"}},{"SurveyID":"SV_1NbeoeO3uH7Y1dH","Element":"SQ","PrimaryAttribute":"QID22","SecondaryAttribute":"Click to write the question text","TertiaryAttribute":null,"Payload":{"QuestionText":"Click to write the question text","DataExportTag":"Q22","QuestionType":"MC","Selector":"SAVR","SubSelector":"TX","Configuration":{"QuestionDescriptionOption":"UseText"},"QuestionDescription":"Click to write the question text","Choices":{"1":{"Display":"Click to write Choice 1"},"2":{"Display":"Click to write Choice 2"},"3":{"Display":"Click to write Choice 3"}},"ChoiceOrder":["1","2","3"],"Validation":{"Settings":{"ForceResponse":"OFF","ForceResponseType":"ON","Type":"None"}},"Language":[],"QuestionID":"QID22"}},{"SurveyID":"SV_1NbeoeO3uH7Y1dH","Element":"SQ","PrimaryAttribute":"QID24","SecondaryAttribute":"Click to write the question text","TertiaryAttribute":null,"Payload":{"QuestionText":"Click to write the question text","DataExportTag":"Q24","QuestionType":"MC","Selector":"SAVR","SubSelector":"TX","Configuration":{"QuestionDescriptionOption":"UseText"},"QuestionDescription":"Click to write the question text","Choices":{"1":{"Display":"Click to write Choice 1"},"2":{"Display":"Click to write Choice 2"},"3":{"Display":"Click to write Choice 3"}},"ChoiceOrder":["1","2","3"],"Validation":{"Settings":{"ForceResponse":"OFF","ForceResponseType":"ON","Type":"None"}},"Language":[],"QuestionID":"QID24"}},{"SurveyID":"SV_1NbeoeO3uH7Y1dH","Element":"SQ","PrimaryAttribute":"QID53","SecondaryAttribute":"Click to write the question text","TertiaryAttribute":null,"Payload":{"QuestionText":"Click to write the question text","DataExportTag":"Q53","QuestionType":"MC","Selector":"SAVR","SubSelector":"TX","Configuration":{"QuestionDescriptionOption":"UseText"},"QuestionDescription":"Click to write the question text","Choices":{"1":{"Display":"Click to write Choice 1"},"2":{"Display":"Click to write Choice 2"},"3":{"Display":"Click to write Choice 3"}},"ChoiceOrder":["1","2","3"],"Validation":{"Settings":{"ForceResponse":"OFF","ForceResponseType":"ON","Type":"None"}},"Language":[],"QuestionID":"QID53"}},{"SurveyID":"SV_1NbeoeO3uH7Y1dH","Element":"SQ","PrimaryAttribute":"QID69","SecondaryAttribute":"Click to write the question text","TertiaryAttribute":null,"Payload":{"QuestionText":"Click to write the question text","DefaultChoices":false,"DataExportTag":"Q69","QuestionType":"DB","Selector":"GRB","SubSelector":"WOTXB","Configuration":{"QuestionDescriptionOption":"UseText"},"QuestionDescription":"Click to write the question text","ChoiceOrder":[],"Validation":{"Settings":{"Type":"None"}},"GradingData":[],"Language":[],"QuestionID":"QID69"}},{"SurveyID":"SV_1NbeoeO3uH7Y1dH","Element":"SQ","PrimaryAttribute":"QID73","SecondaryAttribute":"Click to write the question text","TertiaryAttribute":null,"Payload":{"QuestionText":"Click to write the question text","DataExportTag":"Q73","QuestionType":"MC","Selector":"SAVR","SubSelector":"TX","Configuration":{"QuestionDescriptionOption":"UseText"},"QuestionDescription":"Click to write the question text","Choices":{"1":{"Display":"Click to write Choice 1"},"2":{"Display":"Click to write Choice 2"},"3":{"Display":"Click to write Choice 3"}},"ChoiceOrder":["1","2","3"],"Validation":{"Settings":{"ForceResponse":"OFF","ForceResponseType":"ON","Type":"None"}},"Language":[],"QuestionID":"QID73"}},{"SurveyID":"SV_1NbeoeO3uH7Y1dH","Element":"RS","PrimaryAttribute":"RS_3xfKYrNXtg411Hv","SecondaryAttribute":"Default Response Set","TertiaryAttribute":null,"Payload":null},{"SurveyID":"SV_1NbeoeO3uH7Y1dH","Element":"SQ","PrimaryAttribute":"QID76","SecondaryAttribute":"Describe the wall decor in your bedroom. (2000 character max)","TertiaryAttribute":null,"Payload":{"QuestionText":"Describe the wall decor in your bedroom. (2000 character max)","DefaultChoices":false,"DataExportTag":"Q76","QuestionType":"TE","Selector":"ML","Configuration":{"QuestionDescriptionOption":"UseText","InputWidth":583,"InputHeight":85},"QuestionDescription":"Describe the wall decor in your bedroom. (2000 character max)","Validation":{"Settings":{"ForceResponse":"OFF","ForceResponseType":"ON","Type":"None"}},"GradingData":[],"Language":[],"QuestionID":"QID76","DisplayLogic":{"0":{"0":{"LogicType":"Question","QuestionID":"QID38","QuestionIsInLoop":"no","ChoiceLocator":"q:\/\/QID38\/SelectableChoice\/1","Operator":"Selected","QuestionIDFromLocator":"QID38","LeftOperand":"q:\/\/QID38\/SelectableChoice\/1","Type":"Expression","Description":"<span class=\"ConjDesc\">If<\/span> <span class=\"QuestionDesc\">Do you keep any posters or other forms of wall decor on the walls of your bedroom?<\/span> <span class=\"LeftOpDesc\">Yes<\/span> <span class=\"OpDesc\">Is Selected<\/span> "},"Type":"If"},"Type":"BooleanExpression","inPage":false}}},{"SurveyID":"SV_1NbeoeO3uH7Y1dH","Element":"SQ","PrimaryAttribute":"QID45","SecondaryAttribute":"Do you currently have a career? If so, what is your career? If not, what career would you like to...","TertiaryAttribute":null,"Payload":{"QuestionText":"Do you currently have a career? If so, what is your career? If not, what career would you like to have\/be in?","DefaultChoices":false,"DataExportTag":"Q45","QuestionID":"QID45","QuestionType":"TE","Selector":"SL","Configuration":{"QuestionDescriptionOption":"UseText"},"QuestionDescription":"Do you currently have a career? If so, what is your career? If not, what career would you like to...","Validation":{"Settings":{"ForceResponse":"OFF","ForceResponseType":"ON","Type":"None"}},"GradingData":[],"Language":[]}},{"SurveyID":"SV_1NbeoeO3uH7Y1dH","Element":"SQ","PrimaryAttribute":"QID39","SecondaryAttribute":"Do you exercise regularly? ","TertiaryAttribute":null,"Payload":{"QuestionText":"Do you exercise regularly?&nbsp;","DefaultChoices":false,"DataExportTag":"Q39","QuestionID":"QID39","QuestionType":"MC","Selector":"SAVR","SubSelector":"TX","Configuration":{"QuestionDescriptionOption":"UseText"},"QuestionDescription":"Do you exercise regularly? ","Choices":{"1":{"Display":"Yes"},"2":{"Display":"No"}},"ChoiceOrder":["1","2"],"Validation":{"Settings":{"ForceResponse":"OFF","ForceResponseType":"ON","Type":"None"}},"GradingData":[],"Language":[]}},{"SurveyID":"SV_1NbeoeO3uH7Y1dH","Element":"SQ","PrimaryAttribute":"QID50","SecondaryAttribute":"Do you have any pets? If so, please list their names and what species\/breed of animal they are","TertiaryAttribute":null,"Payload":{"QuestionText":"Do you have any pets? If so, please list their names and what species\/breed of animal they are","DefaultChoices":false,"DataExportTag":"Q50","QuestionID":"QID50","QuestionType":"TE","Selector":"SL","Configuration":{"QuestionDescriptionOption":"UseText"},"QuestionDescription":"Do you have any pets? If so, please list their names and what species\/breed of animal they are","Validation":{"Settings":{"ForceResponse":"OFF","ForceResponseType":"ON","Type":"None"}},"GradingData":[],"Language":[]}},{"SurveyID":"SV_1NbeoeO3uH7Y1dH","Element":"SQ","PrimaryAttribute":"QID58","SecondaryAttribute":"Do you have any tattoos? (If \"Yes\", please describe their design and location. If \"No\", please sa...","TertiaryAttribute":null,"Payload":{"QuestionText":"Do you have any tattoos? (If \"Yes\", please describe their design and location. &nbsp;If \"No\", please say \"I do not have any tattoos\" or skip this question if you do not wish to respond.)","DefaultChoices":false,"DataExportTag":"Q58","QuestionType":"TE","Selector":"SL","Configuration":{"QuestionDescriptionOption":"UseText"},"QuestionDescription":"Do you have any tattoos? (If \"Yes\", please describe their design and location. If \"No\", please sa...","Validation":{"Settings":{"ForceResponse":"OFF","ForceResponseType":"ON","Type":"None"}},"GradingData":[],"Language":[],"QuestionID":"QID58"}},{"SurveyID":"SV_1NbeoeO3uH7Y1dH","Element":"SQ","PrimaryAttribute":"QID59","SecondaryAttribute":"Do you have any visible piercings? (If \"Yes\", please describe their design and location. If \"No\",...","TertiaryAttribute":null,"Payload":{"QuestionText":"Do you have any visible piercings? (If \"Yes\", please describe their design and location. &nbsp;If \"No\", please say \"I do not have any piercings\" or skip this question if you do not wish to respond.)","DefaultChoices":false,"DataExportTag":"Q59","QuestionType":"TE","Selector":"SL","Configuration":{"QuestionDescriptionOption":"UseText"},"QuestionDescription":"Do you have any visible piercings? (If \"Yes\", please describe their design and location. If \"No\",...","Validation":{"Settings":{"ForceResponse":"OFF","ForceResponseType":"ON","Type":"None"}},"GradingData":[],"Language":[],"QuestionID":"QID59"}},{"SurveyID":"SV_1NbeoeO3uH7Y1dH","Element":"SQ","PrimaryAttribute":"QID4","SecondaryAttribute":"Do you identify as Latino or Hispanic?","TertiaryAttribute":null,"Payload":{"QuestionText":"Do you identify as Latino or Hispanic?","DataExportTag":"Q4","QuestionType":"MC","Selector":"SAVR","SubSelector":"TX","Configuration":{"QuestionDescriptionOption":"UseText"},"QuestionDescription":"Do you identify as Latino or Hispanic?","Choices":{"1":{"Display":"Yes"},"2":{"Display":"No"}},"ChoiceOrder":[1,2],"Validation":{"Settings":{"ForceResponse":"OFF","ForceResponseType":"ON","Type":"None"}},"Language":[],"QuestionID":"QID4"}},{"SurveyID":"SV_1NbeoeO3uH7Y1dH","Element":"SQ","PrimaryAttribute":"QID1","SecondaryAttribute":"Do you identify as male or female?","TertiaryAttribute":null,"Payload":{"QuestionText":"Do you identify as male or female?","DataExportTag":"Gender1","QuestionType":"MC","Selector":"SAVR","SubSelector":"TX","Configuration":{"QuestionDescriptionOption":"UseText"},"QuestionDescription":"Do you identify as male or female?","Choices":{"1":{"Display":"Yes, Male"},"2":{"Display":"Yes, Female"},"3":{"Display":"No, I do not identify as male or female"}},"ChoiceOrder":[1,2,3],"Validation":{"Settings":{"ForceResponse":"OFF","ForceResponseType":"ON","Type":"None"}},"Language":[],"QuestionID":"QID1"}},{"SurveyID":"SV_1NbeoeO3uH7Y1dH","Element":"SQ","PrimaryAttribute":"QID38","SecondaryAttribute":"Do you keep any posters or other forms of wall decor on the walls of your bedroom?","TertiaryAttribute":null,"Payload":{"QuestionText":"Do you keep any posters or other forms of wall decor on the walls of your bedroom?","DefaultChoices":false,"DataExportTag":"Q38","QuestionID":"QID38","QuestionType":"MC","Selector":"SAVR","SubSelector":"TX","Configuration":{"QuestionDescriptionOption":"UseText"},"QuestionDescription":"Do you keep any posters or other forms of wall decor on the walls of your bedroom?","Choices":{"1":{"Display":"Yes"},"2":{"Display":"No"}},"ChoiceOrder":["1","2"],"Validation":{"Settings":{"ForceResponse":"OFF","ForceResponseType":"ON","Type":"None"}},"GradingData":[],"Language":[]}},{"SurveyID":"SV_1NbeoeO3uH7Y1dH","Element":"SQ","PrimaryAttribute":"QID35","SecondaryAttribute":"Do you live in a dorm on campus?","TertiaryAttribute":null,"Payload":{"QuestionText":"Do you live in a dorm on campus?","DefaultChoices":false,"DataExportTag":"Q35","QuestionID":"QID35","QuestionType":"MC","Selector":"SAVR","SubSelector":"TX","Configuration":{"QuestionDescriptionOption":"UseText"},"QuestionDescription":"Do you live in a dorm on campus?","Choices":{"1":{"Display":"Yes"},"2":{"Display":"No"}},"ChoiceOrder":["1","2"],"Validation":{"Settings":{"ForceResponse":"OFF","ForceResponseType":"ON","Type":"None"}},"GradingData":[],"Language":[]}},{"SurveyID":"SV_1NbeoeO3uH7Y1dH","Element":"SQ","PrimaryAttribute":"QID60","SecondaryAttribute":"Do you wear a watch?","TertiaryAttribute":null,"Payload":{"QuestionText":"Do you wear a watch?","DataExportTag":"Q60","QuestionType":"MC","Selector":"SAVR","SubSelector":"TX","Configuration":{"QuestionDescriptionOption":"UseText"},"QuestionDescription":"Do you wear a watch?","Choices":{"1":{"Display":"Yes"},"2":{"Display":"No"}},"ChoiceOrder":[1,2],"Validation":{"Settings":{"ForceResponse":"OFF","ForceResponseType":"ON","Type":"None"}},"Language":[],"QuestionID":"QID60"}},{"SurveyID":"SV_1NbeoeO3uH7Y1dH","Element":"SQ","PrimaryAttribute":"QID61","SecondaryAttribute":"Do you wear jewelry? (If \"Yes\", please describe the jewelry that you typically wear.)","TertiaryAttribute":null,"Payload":{"QuestionText":"Do you wear jewelry? (If \"Yes\", please describe the jewelry that you typically wear.)","DefaultChoices":false,"DataExportTag":"Q61","QuestionID":"QID61","QuestionType":"TE","Selector":"ML","Configuration":{"QuestionDescriptionOption":"UseText","InputWidth":581,"InputHeight":59},"QuestionDescription":"Do you wear jewelry? (If \"Yes\", please describe the jewelry that you typically wear.)","Validation":{"Settings":{"ForceResponse":"OFF","ForceResponseType":"ON","Type":"None"}},"GradingData":[],"Language":[]}},{"SurveyID":"SV_1NbeoeO3uH7Y1dH","Element":"SQ","PrimaryAttribute":"QID47","SecondaryAttribute":"Have you graduated from college? If so, what degrees have you received?","TertiaryAttribute":null,"Payload":{"QuestionText":"Have you graduated from college? If so, what degrees have you received?","DefaultChoices":false,"DataExportTag":"Q47","QuestionID":"QID47","QuestionType":"TE","Selector":"ESTB","Configuration":{"QuestionDescriptionOption":"UseText"},"QuestionDescription":"Have you graduated from college? If so, what degrees have you received?","Validation":{"Settings":{"ForceResponse":"OFF","ForceResponseType":"ON","Type":"None"}},"GradingData":[],"Language":[]}},{"SurveyID":"SV_1NbeoeO3uH7Y1dH","Element":"SQ","PrimaryAttribute":"QID37","SecondaryAttribute":"How many roommates do you live with?","TertiaryAttribute":null,"Payload":{"QuestionText":"How many roommates do you live with?","DefaultChoices":false,"DataExportTag":"Q37","QuestionType":"TE","Selector":"SL","Configuration":{"QuestionDescriptionOption":"UseText"},"QuestionDescription":"How many roommates do you live with?","Validation":{"Settings":{"ForceResponse":"OFF","ForceResponseType":"ON","Type":"None"}},"GradingData":[],"Language":[],"QuestionID":"QID37"}},{"SurveyID":"SV_1NbeoeO3uH7Y1dH","Element":"SQ","PrimaryAttribute":"QID63","SecondaryAttribute":"How much do you weigh? (Please answer in pounds or skip this question if you do not feel comforta...","TertiaryAttribute":null,"Payload":{"QuestionText":"How much do you weigh? (Please answer in pounds or skip this question if you do not feel comfortable providing an accurate response)","DefaultChoices":false,"DataExportTag":"Q63","QuestionType":"TE","Selector":"SL","Configuration":{"QuestionDescriptionOption":"UseText"},"QuestionDescription":"How much do you weigh? (Please answer in pounds or skip this question if you do not feel comforta...","Validation":{"Settings":{"ForceResponse":"OFF","ForceResponseType":"ON","Type":"None"}},"GradingData":[],"Language":[],"QuestionID":"QID63"}},{"SurveyID":"SV_1NbeoeO3uH7Y1dH","Element":"SQ","PrimaryAttribute":"QID44","SecondaryAttribute":"How old are you?","TertiaryAttribute":null,"Payload":{"QuestionText":"How old are you?","DefaultChoices":false,"DataExportTag":"Q44","QuestionID":"QID44","QuestionType":"TE","Selector":"SL","Configuration":{"QuestionDescriptionOption":"UseText"},"QuestionDescription":"How old are you?","Validation":{"Settings":{"ForceResponse":"OFF","ForceResponseType":"ON","Type":"None"}},"GradingData":[],"Language":[]}},{"SurveyID":"SV_1NbeoeO3uH7Y1dH","Element":"SQ","PrimaryAttribute":"QID62","SecondaryAttribute":"How tall are you? ","TertiaryAttribute":null,"Payload":{"QuestionText":"How tall are you?&nbsp;","DefaultChoices":false,"DataExportTag":"Q62","QuestionID":"QID62","QuestionType":"TE","Selector":"SL","Configuration":{"QuestionDescriptionOption":"UseText"},"QuestionDescription":"How tall are you? ","Validation":{"Settings":{"ForceResponse":"OFF","ForceResponseType":"ON","Type":"None"}},"GradingData":[],"Language":[]}},{"SurveyID":"SV_1NbeoeO3uH7Y1dH","Element":"SQ","PrimaryAttribute":"QID46","SecondaryAttribute":"If you are currently enrolled in a college, please list all of the classes you can remember that...","TertiaryAttribute":null,"Payload":{"QuestionText":"If you are currently enrolled in a college, please list all of the classes you can remember that you are enrolled in this semester\/quarter\/trimester (class numbers and names would be appreciated, but whatever you can remember is sufficient).","DefaultChoices":false,"DataExportTag":"Q46","QuestionID":"QID46","QuestionType":"TE","Selector":"ESTB","Configuration":{"QuestionDescriptionOption":"UseText","InputWidth":652,"InputHeight":188},"QuestionDescription":"If you are currently enrolled in a college, please list all of the classes you can remember that...","Validation":{"Settings":{"ForceResponse":"OFF","ForceResponseType":"ON","Type":"None"}},"GradingData":[],"Language":[]}},{"SurveyID":"SV_1NbeoeO3uH7Y1dH","Element":"SQ","PrimaryAttribute":"QID2","SecondaryAttribute":"If you do not identify as male or female, please report the gender you identify as:","TertiaryAttribute":null,"Payload":{"QuestionText":"If you do not identify as male or female, please report the gender you identify as:","DefaultChoices":false,"DataExportTag":"Gender2","QuestionID":"QID2","QuestionType":"TE","Selector":"SL","Configuration":{"QuestionDescriptionOption":"UseText"},"QuestionDescription":"If you do not identify as male or female, please report the gender you identify as:","Validation":{"Settings":{"ForceResponse":"OFF","ForceResponseType":"ON","Type":"None"}},"GradingData":[],"Language":[]}},{"SurveyID":"SV_1NbeoeO3uH7Y1dH","Element":"SQ","PrimaryAttribute":"QID18","SecondaryAttribute":"One of the tasks in the virtual environment will be to introduce yourself to a class on your firs...","TertiaryAttribute":null,"Payload":{"QuestionText":"One of the tasks in the virtual environment will be to introduce yourself to a class on your first day. Please write a short personal introduction (around 500 words) that at least includes your name, hometown, a short description of a memorable experience you had during your freshman year, and one interesting fact about you.","DefaultChoices":false,"DataExportTag":"Q18","QuestionType":"TE","Selector":"ESTB","Configuration":{"QuestionDescriptionOption":"UseText","InputWidth":577,"InputHeight":29},"QuestionDescription":"One of the tasks in the virtual environment will be to introduce yourself to a class on your firs...","Validation":{"Settings":{"ForceResponse":"ON","ForceResponseType":"ON","Type":"None"}},"GradingData":[],"Language":[],"QuestionID":"QID18"}},{"SurveyID":"SV_1NbeoeO3uH7Y1dH","Element":"SQ","PrimaryAttribute":"QID15","SecondaryAttribute":"Participants in this study will have a virtual reality environment and avatar based on themselves...","TertiaryAttribute":null,"Payload":{"QuestionText":"Participants in this study will have a virtual reality environment and avatar based on themselves, dorm room, and daily activities. The following questions will ask you about various aspects of your daily life so that we can build a personalized virtual reality environment for someone to live a day in your life. Please answer as honestly and accurately as you can. If you can't remember an answer to a question, feel free to leave it blank; we would rather have less information than incorrect information.","DefaultChoices":false,"DataExportTag":"Q15","QuestionType":"DB","Selector":"TB","Configuration":{"QuestionDescriptionOption":"UseText"},"QuestionDescription":"Participants in this study will have a virtual reality environment and avatar based on themselves...","ChoiceOrder":[],"Validation":{"Settings":{"Type":"None"}},"GradingData":[],"Language":[],"QuestionID":"QID15"}},{"SurveyID":"SV_1NbeoeO3uH7Y1dH","Element":"SQ","PrimaryAttribute":"QID20","SecondaryAttribute":"Please indicate how much you agree with the following statements.","TertiaryAttribute":null,"Payload":{"QuestionText":"Please indicate how much you agree with the following statements.","DefaultChoices":false,"DataExportTag":"Q20","QuestionType":"Slider","Selector":"HSLIDER","Configuration":{"QuestionDescriptionOption":"UseText","CSSliderMin":0,"CSSliderMax":100,"GridLines":4,"SnapToGrid":false,"NumDecimals":"0","ShowValue":true,"CustomStart":true,"NotApplicable":false,"MobileFirst":true,"SliderStartPositions":{"1":0.5,"2":0.5,"3":0.5}},"QuestionDescription":"Please indicate how much you agree with the following statements.","Choices":{"1":{"Display":"Most people lead clean, decent lives."},"2":{"Display":"Most students will tell the instructor when s\/he has made a mistake in adding up their score, even if s\/he had given them more points than they deserved."},"3":{"Display":"Most people are basically honest."}},"ChoiceOrder":[1,2,3],"Validation":{"Settings":{"ForceResponse":"ON","ForceResponseType":"ON","Type":"None"}},"GradingData":[],"Language":[],"Labels":{"1":{"Display":"Disagree"},"2":{"Display":"Neutral"},"3":{"Display":"Agree"}},"QuestionID":"QID20"}},{"SurveyID":"SV_1NbeoeO3uH7Y1dH","Element":"SQ","PrimaryAttribute":"QID26","SecondaryAttribute":"Please indicate how much you agree with the following statements.","TertiaryAttribute":null,"Payload":{"QuestionText":"Please indicate how much you agree with the following statements.","DefaultChoices":false,"DataExportTag":"Q26","QuestionType":"Slider","Selector":"HSLIDER","Configuration":{"QuestionDescriptionOption":"UseText","CSSliderMin":0,"CSSliderMax":100,"GridLines":4,"SnapToGrid":false,"NumDecimals":"0","ShowValue":true,"CustomStart":true,"NotApplicable":false,"MobileFirst":true,"SliderStartPositions":{"1":0.5034965034965,"2":0.5,"3":0.5}},"QuestionDescription":"Please indicate how much you agree with the following statements.","Choices":{"1":{"Display":"If you want people to do a job right, you should explain things to them in great detail and supervise them closely."},"2":{"Display":"Most students do not cheat when taking an exam."},"3":{"Display":"Nowadays people commit a lot of crimes and sins that no one else ever hears about."}},"ChoiceOrder":[1,2,3],"Validation":{"Settings":{"ForceResponse":"ON","ForceResponseType":"ON","Type":"None"}},"GradingData":[],"Language":[],"Labels":{"1":{"Display":"Disagree"},"2":{"Display":"Neutral"},"3":{"Display":"Agree"}},"QuestionID":"QID26"}},{"SurveyID":"SV_1NbeoeO3uH7Y1dH","Element":"SQ","PrimaryAttribute":"QID27","SecondaryAttribute":"Please indicate how much you agree with the following statements.","TertiaryAttribute":null,"Payload":{"QuestionText":"Please indicate how much you agree with the following statements.","DefaultChoices":false,"DataExportTag":"Q27","QuestionType":"Slider","Selector":"HSLIDER","Configuration":{"QuestionDescriptionOption":"UseText","CSSliderMin":0,"CSSliderMax":100,"GridLines":4,"SnapToGrid":false,"NumDecimals":"0","ShowValue":true,"CustomStart":true,"NotApplicable":false,"MobileFirst":true,"SliderStartPositions":{"1":0.4988344988345,"2":0.5,"3":0.5034965034965}},"QuestionDescription":"Please indicate how much you agree with the following statements.","Choices":{"1":{"Display":"People claim they have ethical standards regarding honesty and morality, but few people stick to them when the chips are down."},"2":{"Display":"People usually tell the truth, even when they know they would be better off by lying."},"3":{"Display":"If you give the average person a job to do and leave them to do it, they will finish it successfully."}},"ChoiceOrder":[1,2,3],"Validation":{"Settings":{"ForceResponse":"ON","ForceResponseType":"ON","Type":"None"}},"GradingData":[],"Language":[],"Labels":{"1":{"Display":"Disagree"},"2":{"Display":"Neutral"},"3":{"Display":"Agree"}},"QuestionID":"QID27"}},{"SurveyID":"SV_1NbeoeO3uH7Y1dH","Element":"SQ","PrimaryAttribute":"QID28","SecondaryAttribute":"Please indicate how much you agree with the following statements.","TertiaryAttribute":null,"Payload":{"QuestionText":"Please indicate how much you agree with the following statements.","DefaultChoices":false,"DataExportTag":"Q28","QuestionType":"Slider","Selector":"HSLIDER","Configuration":{"QuestionDescriptionOption":"UseText","CSSliderMin":0,"CSSliderMax":100,"GridLines":4,"SnapToGrid":false,"NumDecimals":"0","ShowValue":true,"CustomStart":true,"NotApplicable":false,"MobileFirst":true,"SliderStartPositions":{"1":0.5,"2":0.5,"3":0.5}},"QuestionDescription":"Please indicate how much you agree with the following statements.","Choices":{"1":{"Display":"Most people would cheat on their income tax, if they had a chance."},"2":{"Display":"If you act in good faith with people, almost all of them will reciprocate with fairness toward you."},"3":{"Display":"Most people are not really honest; they\u2019re just afraid of getting caught."}},"ChoiceOrder":[1,2,3],"Validation":{"Settings":{"ForceResponse":"ON","ForceResponseType":"ON","Type":"None"}},"GradingData":[],"Language":[],"Labels":{"1":{"Display":"Disagree"},"2":{"Display":"Neutral"},"3":{"Display":"Agree"}},"QuestionID":"QID28"}},{"SurveyID":"SV_1NbeoeO3uH7Y1dH","Element":"SQ","PrimaryAttribute":"QID29","SecondaryAttribute":"Please indicate how much you agree with the following statements.","TertiaryAttribute":null,"Payload":{"QuestionText":"Please indicate how much you agree with the following statements.","DefaultChoices":false,"DataExportTag":"Q29","QuestionType":"Slider","Selector":"HSLIDER","Configuration":{"QuestionDescriptionOption":"UseText","CSSliderMin":0,"CSSliderMax":100,"GridLines":4,"SnapToGrid":false,"NumDecimals":"0","ShowValue":true,"CustomStart":true,"NotApplicable":false,"MobileFirst":true,"SliderStartPositions":{"1":0.5,"2":0.5}},"QuestionDescription":"Please indicate how much you agree with the following statements.","Choices":{"1":{"Display":"Most people would tell a lie if they could gain by it."},"2":{"Display":"If most people could get into a movie without paying and be sure they were not seen, they would do it."}},"ChoiceOrder":[1,2],"Validation":{"Settings":{"ForceResponse":"ON","ForceResponseType":"ON","Type":"None"}},"GradingData":[],"Language":[],"Labels":{"1":{"Display":"Disagree"},"2":{"Display":"Neutral"},"3":{"Display":"Agree"}},"QuestionID":"QID29"}},{"SurveyID":"SV_1NbeoeO3uH7Y1dH","Element":"SQ","PrimaryAttribute":"QID51","SecondaryAttribute":"Please list 4 or 5 pieces of advice you would give an incoming freshman in college","TertiaryAttribute":null,"Payload":{"QuestionText":"Please list 4 or 5 pieces of advice you would give an incoming freshman in college","DefaultChoices":false,"DataExportTag":"Q51","QuestionType":"TE","Selector":"ESTB","Configuration":{"QuestionDescriptionOption":"UseText","InputWidth":578,"InputHeight":243},"QuestionDescription":"Please list 4 or 5 pieces of advice you would give an incoming freshman in college","Validation":{"Settings":{"ForceResponse":"OFF","ForceResponseType":"ON","Type":"None"}},"GradingData":[],"Language":[],"QuestionID":"QID51"}},{"SurveyID":"SV_1NbeoeO3uH7Y1dH","Element":"SQ","PrimaryAttribute":"QID31","SecondaryAttribute":"Please list some toiletries you use in your everyday life or that you would take with you on a tr...","TertiaryAttribute":null,"Payload":{"QuestionText":"Please list some toiletries you use in your everyday life or that you would take with you on a trip (shampoo, toothpaste, etc). If you can think of the brands you use then that information would be appreciated, though it is not necessary.","DefaultChoices":false,"DataExportTag":"Q31","QuestionType":"TE","Selector":"FORM","Configuration":{"QuestionDescriptionOption":"UseText"},"QuestionDescription":"Please list some toiletries you use in your everyday life or that you would take with you on a tr...","Validation":{"Settings":{"ForceResponse":"OFF","ForceResponseType":"ON","Type":null}},"GradingData":[],"Language":[],"QuestionID":"QID31","Choices":{"1":{"Display":"Item 1","TextEntry":"on","InputHeight":30,"InputWidth":470,"TextEntryLength":"Long"},"2":{"Display":"Item 2","TextEntry":"on","InputHeight":29,"InputWidth":470,"TextEntryLength":"Long"},"3":{"Display":"Item 3","TextEntry":"on","InputHeight":29,"InputWidth":470,"TextEntryLength":"Long"},"4":{"Display":"Item 4","TextEntry":"on","InputHeight":29,"InputWidth":470,"TextEntryLength":"Long"},"5":{"Display":"Item 5","TextEntry":"on","InputHeight":29,"InputWidth":470,"TextEntryLength":"Long"},"6":{"Display":"Item 6","TextEntry":"on","InputHeight":29,"InputWidth":470,"TextEntryLength":"Long"},"7":{"Display":"Item 7","TextEntry":"on","InputHeight":29,"InputWidth":470,"TextEntryLength":"Long"},"8":{"Display":"Item 8","TextEntry":"on","InputHeight":39,"InputWidth":470,"TextEntryLength":"Long"}},"ChoiceOrder":["1","2","3","4","5","6","7","8"]}},{"SurveyID":"SV_1NbeoeO3uH7Y1dH","Element":"SQ","PrimaryAttribute":"QID75","SecondaryAttribute":"Please offer a brief description of the dwelling in which you reside (i.e. a two bedroom apartmen...","TertiaryAttribute":null,"Payload":{"QuestionText":"Please offer a brief description of the dwelling in which you reside (i.e. a two bedroom apartment, a fraternity house, etc)","DefaultChoices":false,"DataExportTag":"Q75","QuestionType":"TE","Selector":"SL","Configuration":{"QuestionDescriptionOption":"UseText"},"QuestionDescription":"Please offer a brief description of the dwelling in which you reside (i.e. a two bedroom apartmen...","DisplayLogic":{"0":{"0":{"LogicType":"Question","QuestionID":"QID35","QuestionIsInLoop":"no","ChoiceLocator":"q:\/\/QID35\/SelectableChoice\/2","Operator":"Selected","QuestionIDFromLocator":"QID35","LeftOperand":"q:\/\/QID35\/SelectableChoice\/2","Type":"Expression","Description":"<span class=\"ConjDesc\">If<\/span> <span class=\"QuestionDesc\">Do you live in a dorm on campus? If not, please offer a brief description of the dwelling in which you reside (a two-bedroom apartment, a fraternity house, etc)<\/span> <span class=\"LeftOpDesc\">No<\/span> <span class=\"OpDesc\">Is Selected<\/span> "},"Type":"If"},"Type":"BooleanExpression","inPage":false},"Validation":{"Settings":{"ForceResponse":"OFF","ForceResponseType":"ON","Type":"None"}},"GradingData":[],"Language":[],"QuestionID":"QID75"}},{"SurveyID":"SV_1NbeoeO3uH7Y1dH","Element":"SQ","PrimaryAttribute":"QID66","SecondaryAttribute":"Please review this information carefully. \u00a0On the next page we will require your signature if you..","TertiaryAttribute":null,"Payload":{"QuestionText":"Please review this information carefully. &nbsp;On the next page we will require your signature if you indicate <strong>&quot;YES&quot;<\/strong>&nbsp;for all the items listed and will begin the questionnaire.","DefaultChoices":false,"DataExportTag":"Q66","QuestionID":"QID66","QuestionType":"Draw","Selector":"Signature","Configuration":{"QuestionDescriptionOption":"UseText","ShowBackgroundText":true,"BoxSize":"Medium"},"QuestionDescription":"Please review this information carefully. \u00a0On the next page we will require your signature if you...","Validation":{"Settings":{"ForceResponse":"OFF"}},"GradingData":[],"Language":[]}},{"SurveyID":"SV_1NbeoeO3uH7Y1dH","Element":"SQ","PrimaryAttribute":"QID67","SecondaryAttribute":"Please review this information carefully. \u00a0On the next page we will require your signature if you..","TertiaryAttribute":null,"Payload":{"QuestionText":"Please review this information carefully. &nbsp;On the next page we will require your signature if you indicate <strong>&quot;YES&quot;<\/strong>&nbsp;for all the items listed and will begin the questionnaire.","DefaultChoices":false,"DataExportTag":"Q67","QuestionType":"DB","Selector":"GRB","SubSelector":"WTXB","Configuration":{"QuestionDescriptionOption":"UseText"},"QuestionDescription":"Please review this information carefully. \u00a0On the next page we will require your signature if you...","ChoiceOrder":[],"Validation":{"Settings":{"Type":"None"}},"GradingData":[],"Language":[],"Graphics":"IM_6JesrXZ1PVpD4Ff","GraphicsDescription":"Vrpt informed consent document page 002","QuestionID":"QID67"}},{"SurveyID":"SV_1NbeoeO3uH7Y1dH","Element":"SQ","PrimaryAttribute":"QID6","SecondaryAttribute":"Please select your preferred outcome","TertiaryAttribute":null,"Payload":{"QuestionText":"Please select your preferred outcome","DefaultChoices":false,"DataExportTag":"Q6","QuestionID":"QID6","QuestionType":"MC","Selector":"SAVR","SubSelector":"TX","Configuration":{"QuestionDescriptionOption":"UseText","TextPosition":"inline"},"QuestionDescription":"Please select your preferred outcome","Choices":{"1":{"Display":"You: 480 Other: 80"},"2":{"Display":"You: 540 Other: 280"},"3":{"Display":"You: 480 Other: 480"}},"ChoiceOrder":[1,2,3],"Validation":{"Settings":{"ForceResponse":"ON","ForceResponseType":"ON","Type":"None"}},"GradingData":[],"Language":[]}},{"SurveyID":"SV_1NbeoeO3uH7Y1dH","Element":"SQ","PrimaryAttribute":"QID7","SecondaryAttribute":"Please select your preferred outcome","TertiaryAttribute":null,"Payload":{"QuestionText":"Please select your preferred outcome","DefaultChoices":false,"DataExportTag":"Q7","QuestionType":"MC","Selector":"SAVR","SubSelector":"TX","Configuration":{"QuestionDescriptionOption":"UseText"},"QuestionDescription":"Please select your preferred outcome","Choices":{"1":{"Display":"You: 560 Other: 300"},"2":{"Display":"You: 500 Other: 500"},"3":{"Display":"You: 500 Other: 100"}},"ChoiceOrder":[1,2,3],"Validation":{"Settings":{"ForceResponse":"ON","ForceResponseType":"ON","Type":"None"}},"GradingData":[],"Language":[],"QuestionID":"QID7"}},{"SurveyID":"SV_1NbeoeO3uH7Y1dH","Element":"SQ","PrimaryAttribute":"QID8","SecondaryAttribute":"Please select your preferred outcome","TertiaryAttribute":null,"Payload":{"QuestionText":"Please select your preferred outcome","DefaultChoices":false,"DataExportTag":"Q8","QuestionType":"MC","Selector":"SAVR","SubSelector":"TX","Configuration":{"QuestionDescriptionOption":"UseText"},"QuestionDescription":"Please select your preferred outcome","Choices":{"1":{"Display":"You: 520 Other: 520"},"2":{"Display":"You: 520 Other: 120"},"3":{"Display":"You: 580 Other: 320"}},"ChoiceOrder":[1,2,3],"Validation":{"Settings":{"ForceResponse":"ON","ForceResponseType":"ON","Type":"None"}},"GradingData":[],"Language":[],"QuestionID":"QID8"}},{"SurveyID":"SV_1NbeoeO3uH7Y1dH","Element":"SQ","PrimaryAttribute":"QID9","SecondaryAttribute":"Please select your preferred outcome","TertiaryAttribute":null,"Payload":{"QuestionText":"Please select your preferred outcome","DefaultChoices":false,"DataExportTag":"Q9","QuestionType":"MC","Selector":"SAVR","SubSelector":"TX","Configuration":{"QuestionDescriptionOption":"UseText"},"QuestionDescription":"Please select your preferred outcome","Choices":{"1":{"Display":"You: 500 Other: 100"},"2":{"Display":"You: 560 Other: 300"},"3":{"Display":"You: 490 Other: 490"}},"ChoiceOrder":[1,2,3],"Validation":{"Settings":{"ForceResponse":"ON","ForceResponseType":"ON","Type":"None"}},"GradingData":[],"Language":[],"QuestionID":"QID9"}},{"SurveyID":"SV_1NbeoeO3uH7Y1dH","Element":"SQ","PrimaryAttribute":"QID10","SecondaryAttribute":"Please select your preferred outcome","TertiaryAttribute":null,"Payload":{"QuestionText":"Please select your preferred outcome","DefaultChoices":false,"DataExportTag":"Q10","QuestionType":"MC","Selector":"SAVR","SubSelector":"TX","Configuration":{"QuestionDescriptionOption":"UseText"},"QuestionDescription":"Please select your preferred outcome","Choices":{"1":{"Display":"You: 560 Other: 300"},"2":{"Display":"You: 500 Other: 500"},"3":{"Display":"You: 490 Other: 90"}},"ChoiceOrder":[1,2,3],"Validation":{"Settings":{"ForceResponse":"ON","ForceResponseType":"ON","Type":"None"}},"GradingData":[],"Language":[],"QuestionID":"QID10"}},{"SurveyID":"SV_1NbeoeO3uH7Y1dH","Element":"SQ","PrimaryAttribute":"QID11","SecondaryAttribute":"Please select your preferred outcome","TertiaryAttribute":null,"Payload":{"QuestionText":"Please select your preferred outcome","DefaultChoices":false,"DataExportTag":"Q11","QuestionType":"MC","Selector":"SAVR","SubSelector":"TX","Configuration":{"QuestionDescriptionOption":"UseText"},"QuestionDescription":"Please select your preferred outcome","Choices":{"1":{"Display":"You: 500 Other: 500"},"2":{"Display":"You: 500 Other: 100"},"3":{"Display":"You: 570 Other: 300"}},"ChoiceOrder":[1,2,3],"Validation":{"Settings":{"ForceResponse":"ON","ForceResponseType":"ON","Type":"None"}},"GradingData":[],"Language":[],"QuestionID":"QID11"}},{"SurveyID":"SV_1NbeoeO3uH7Y1dH","Element":"SQ","PrimaryAttribute":"QID12","SecondaryAttribute":"Please select your preferred outcome","TertiaryAttribute":null,"Payload":{"QuestionText":"Please select your preferred outcome","DefaultChoices":false,"DataExportTag":"Q12","QuestionType":"MC","Selector":"SAVR","SubSelector":"TX","Configuration":{"QuestionDescriptionOption":"UseText"},"QuestionDescription":"Please select your preferred outcome","Choices":{"1":{"Display":"You: 510 Other: 510"},"2":{"Display":"You: 560 Other: 300"},"3":{"Display":"You: 510 Other: 110"}},"ChoiceOrder":[1,2,3],"Validation":{"Settings":{"ForceResponse":"ON","ForceResponseType":"ON","Type":"None"}},"GradingData":[],"Language":[],"QuestionID":"QID12"}},{"SurveyID":"SV_1NbeoeO3uH7Y1dH","Element":"SQ","PrimaryAttribute":"QID13","SecondaryAttribute":"Please select your preferred outcome","TertiaryAttribute":null,"Payload":{"QuestionText":"Please select your preferred outcome","DefaultChoices":false,"DataExportTag":"Q13","QuestionType":"MC","Selector":"SAVR","SubSelector":"TX","Configuration":{"QuestionDescriptionOption":"UseText"},"QuestionDescription":"Please select your preferred outcome","Choices":{"1":{"Display":"You: 550 Other: 300"},"2":{"Display":"You: 500 Other: 100"},"3":{"Display":"You: 500 Other: 500"}},"ChoiceOrder":[1,2,3],"Validation":{"Settings":{"ForceResponse":"ON","ForceResponseType":"ON","Type":"None"}},"GradingData":[],"Language":[],"QuestionID":"QID13"}},{"SurveyID":"SV_1NbeoeO3uH7Y1dH","Element":"SQ","PrimaryAttribute":"QID14","SecondaryAttribute":"Please select your preferred outcome","TertiaryAttribute":null,"Payload":{"QuestionText":"Please select your preferred outcome","DefaultChoices":false,"DataExportTag":"Q14","QuestionType":"MC","Selector":"SAVR","SubSelector":"TX","Configuration":{"QuestionDescriptionOption":"UseText"},"QuestionDescription":"Please select your preferred outcome","Choices":{"1":{"Display":"You: 480 Other: 100"},"2":{"Display":"You: 490 Other: 490"},"3":{"Display":"You: 540 Other: 300"}},"ChoiceOrder":[1,2,3],"Validation":{"Settings":{"ForceResponse":"ON","ForceResponseType":"ON","Type":"None"}},"GradingData":[],"Language":[],"QuestionID":"QID14"}},{"SurveyID":"SV_1NbeoeO3uH7Y1dH","Element":"SQ","PrimaryAttribute":"QID17","SecondaryAttribute":"Please stand in the middle of your bedroom or dorm room and take 4 or 5 photos of your room from...","TertiaryAttribute":null,"Payload":{"QuestionText":"Please stand in the middle of your bedroom or dorm room and take 4 or 5 photos of your room from different angles. Please try to capture the entirety of the room. If there are corners of your room that are not entirely visible from the center of your room, feel free to move from the center of your room to take a pictures of that\/those corner(s). The better the pictures, the better able we will be able to create a virtual environment that looks similar to the room, so your best effort is appreciated. Pictures specifically of the floor and ceiling are not necessary.","DataExportTag":"Q17","QuestionType":"MC","Selector":"SAVR","SubSelector":"TX","Configuration":{"QuestionDescriptionOption":"UseText"},"QuestionDescription":"Please stand in the middle of your bedroom or dorm room and take 4 or 5 photos of your room from...","Choices":{"1":{"Display":"Click to write Choice 1"},"2":{"Display":"Click to write Choice 2"},"3":{"Display":"Click to write Choice 3"}},"ChoiceOrder":["1","2","3"],"Validation":{"Settings":{"ForceResponse":"ON","ForceResponseType":"ON","Type":"None"}},"Language":[],"QuestionID":"QID17"}},{"SurveyID":"SV_1NbeoeO3uH7Y1dH","Element":"SQ","PrimaryAttribute":"QID42","SecondaryAttribute":"Please talk about\/describe any hobbies you have (please try to list 3 or more)","TertiaryAttribute":null,"Payload":{"QuestionText":"Please talk about\/describe any hobbies you have (please try to list 3 or more)","DefaultChoices":false,"DataExportTag":"Q42","QuestionID":"QID42","QuestionType":"TE","Selector":"FORM","Configuration":{"QuestionDescriptionOption":"UseText"},"QuestionDescription":"Please talk about\/describe any hobbies you have (please try to list 3 or more)","Validation":{"Settings":{"ForceResponse":"OFF","ForceResponseType":"ON","Type":null}},"GradingData":[],"Language":[],"Choices":{"1":{"Display":"Hobby 1","TextEntryLength":"Long","TextEntry":"on"},"2":{"Display":"Hobby 2","TextEntryLength":"Long","TextEntry":"on"},"3":{"Display":"Hobby 3","TextEntryLength":"Long","TextEntry":"on"},"4":{"Display":"Hobby 4","TextEntryLength":"Long","TextEntry":"on"},"5":{"Display":"Hobby 5","TextEntryLength":"Long","TextEntry":"on"}},"ChoiceOrder":[1,2,3,4,5]}},{"SurveyID":"SV_1NbeoeO3uH7Y1dH","Element":"SQ","PrimaryAttribute":"QID16","SecondaryAttribute":"Please upload a picture of your face. The picture must show the entirety of one's face. The less...","TertiaryAttribute":null,"Payload":{"QuestionText":"Please upload a picture of your face. The picture must show the entirety of one's face. The less that is shown besides one's face, the better. Please do not smile or show any teeth in your photo, and please do not wear any hats or eye wear.","DataExportTag":"Q16","QuestionType":"MC","Selector":"SAVR","SubSelector":"TX","Configuration":{"QuestionDescriptionOption":"UseText"},"QuestionDescription":"Please upload a picture of your face. The picture must show the entirety of one's face. The less...","Choices":{"1":{"Display":"Click to write Choice 1"},"2":{"Display":"Click to write Choice 2"},"3":{"Display":"Click to write Choice 3"}},"ChoiceOrder":["1","2","3"],"Validation":{"Settings":{"ForceResponse":"ON","ForceResponseType":"ON","Type":"None"}},"Language":[],"QuestionID":"QID16"}},{"SurveyID":"SV_1NbeoeO3uH7Y1dH","Element":"SQ","PrimaryAttribute":"QID52","SecondaryAttribute":"Research Assistant: Please enter the subject's SONA number below.","TertiaryAttribute":null,"Payload":{"QuestionText":"Research Assistant:<div><br><\/div><div>Please enter the subject's SONA number below.<\/div>","DefaultChoices":false,"DataExportTag":"Q52","QuestionType":"TE","Selector":"SL","Configuration":{"QuestionDescriptionOption":"UseText"},"QuestionDescription":"Research Assistant: Please enter the subject's SONA number below.","Validation":{"Settings":{"ForceResponse":"OFF","ForceResponseType":"ON","Type":"None"}},"GradingData":[],"Language":[],"QuestionID":"QID52"}},{"SurveyID":"SV_1NbeoeO3uH7Y1dH","Element":"SQ","PrimaryAttribute":"QID68","SecondaryAttribute":"Study Information and Informed Consent You are invited to participate in a research study that wi...","TertiaryAttribute":null,"Payload":{"QuestionText":"<div><b><u>Study Information and Informed Consent<\/u><\/b><\/div>You are invited to participate in a research study that will ask about your opinions and attitudes. You must be at least 18 years of age to participate. Your participation will take less than 30 minutes for the online questionnaire and 60 minutes for the in-lab virtual reality portion of the study. There are no risks associated with this study and your identity will be kept confidential.&nbsp;We cannot and do not guarantee or promise that you will receive any benefits from this study.<br>\n&nbsp;<br>\n<strong><u>Payment<\/u><\/strong><br>\nYou will receive up to $50.00 for your participation in this study upon completing the in-lab virtual reality portion of the study.<br>\n&nbsp;<br>\n<strong><u>Participation<\/u><\/strong><br>\nIf you decide to participate in this project, please understand <strong>your participation is voluntary and you may withdraw your consent or discontinue participation at any time<\/strong> without penalty. The alternative is not to participate. <strong>You have the right to refuse to answer particular questions<\/strong>. Your individual privacy will be maintained in all published and written data resulting from the study.&nbsp;<br>\n&nbsp;<br>\n<strong><u>Contact Information<\/u><\/strong><br>\nIf you have any questions, concerns or complaints about this research, its procedures, risks and benefits, contact the Protocol Director, Joshua Bostick at jbostick@stanford.edu. If you wish to contact someone independent of the researchers, you may email the Stanford Institutional Review Board at <a href=\"mailto:irb2-manager@lists.stanford.edu\">irb2-manager@lists.stanford.edu<\/a>.<br>\n&nbsp;<br>\nIRB Approval Date: 12\/12\/2016<br>\n&nbsp;<br>\nIf you agree to participate in this research, please click to the next screen and complete the questionnaire","DefaultChoices":false,"DataExportTag":"Q68","QuestionID":"QID68","QuestionType":"DB","Selector":"TB","Configuration":{"QuestionDescriptionOption":"UseText"},"QuestionDescription":"Study Information and Informed Consent You are invited to participate in a research study that wi...","ChoiceOrder":[],"Validation":{"Settings":{"Type":"None"}},"GradingData":[],"Language":[]}},{"SurveyID":"SV_1NbeoeO3uH7Y1dH","Element":"SQ","PrimaryAttribute":"QID23","SecondaryAttribute":"The following statements inquire about your thoughts and feeling in a variety of situations. For...","TertiaryAttribute":null,"Payload":{"QuestionText":"The following statements inquire about your thoughts and feeling in a variety of situations. For each item, indicate how tell it describes you by choosing the appropriate number on the scale at the top of the page. When you have decided on your answer, fill in the corresponding point. READ EACH ITEM CAREFULLY BEFORE RESPONDING. Answer as honestly as you can. Thank you.","DefaultChoices":false,"DataExportTag":"Q23","QuestionType":"Matrix","Selector":"Likert","SubSelector":"SingleAnswer","Configuration":{"QuestionDescriptionOption":"UseText","TextPosition":"inline","ChoiceColumnWidth":25,"RepeatHeaders":"none","WhiteSpace":"OFF","MobileFirst":true},"QuestionDescription":"The following statements inquire about your thoughts and feeling in a variety of situations. For...","Choices":{"1":{"Display":"Sometimes I don't feel very sorry for other people when they are having problems."},"2":{"Display":"Other people's misfortunes do not usually disturb me a great deal."},"3":{"Display":"I would describe myself as a pretty soft-hearted person."}},"ChoiceOrder":[1,2,3],"Validation":{"Settings":{"ForceResponse":"ON","ForceResponseType":"ON","Type":"None"}},"GradingData":[],"Language":[],"ColumnLabels":[{"Display":"<div>Does not<br \/>\ndescribe<br \/>\nme well<\/div>","IsLabelDefault":false},{"Display":"&nbsp;","IsLabelDefault":false},{"Display":"&nbsp;","IsLabelDefault":false},{"Display":"&nbsp;","IsLabelDefault":false},{"Display":"Describes<br \/>\nme well","IsLabelDefault":false}],"Answers":{"1":{"Display":"1"},"2":{"Display":"2"},"3":{"Display":"3"},"4":{"Display":"4"},"5":{"Display":"5"}},"AnswerOrder":[1,2,3,4,5],"ChoiceDataExportTags":false,"QuestionID":"QID23"}},{"SurveyID":"SV_1NbeoeO3uH7Y1dH","Element":"SQ","PrimaryAttribute":"QID30","SecondaryAttribute":"The following statements inquire about your thoughts and feeling in a variety of situations. For...","TertiaryAttribute":null,"Payload":{"QuestionText":"The following statements inquire about your thoughts and feeling in a variety of situations. For each item, indicate how well it describes you by choosing the appropriate number on the scale at the top of the page. When you have decided on your answer, fill in the corresponding point. READ EACH ITEM CAREFULLY BEFORE RESPONDING. Answer as honestly as you can. Thank you.","DefaultChoices":false,"DataExportTag":"Q30","QuestionType":"Matrix","Selector":"Likert","SubSelector":"SingleAnswer","Configuration":{"QuestionDescriptionOption":"UseText","TextPosition":"inline","ChoiceColumnWidth":25,"RepeatHeaders":"none","WhiteSpace":"OFF","MobileFirst":true},"QuestionDescription":"The following statements inquire about your thoughts and feeling in a variety of situations. For...","Choices":{"1":{"Display":"I believe that there are two sides to every question and try to look at them both."},"2":{"Display":"When I'm upset at someone, I usually try to \"put myself in their shoes\" for a while."},"3":{"Display":"Before criticizing somebody, I try to imagine how I would feel if I were in their place."}},"ChoiceOrder":[1,2,3],"Validation":{"Settings":{"ForceResponse":"ON","ForceResponseType":"ON","Type":"None"}},"GradingData":[],"Language":[],"ColumnLabels":[{"Display":"<div style=\"text-align: center;\">Does not<br \/>\ndescribe<br \/>\nme well<\/div>","IsLabelDefault":false},{"Display":"&nbsp;","IsLabelDefault":false},{"Display":"&nbsp;","IsLabelDefault":false},{"Display":"&nbsp;","IsLabelDefault":false},{"Display":"Describes<br \/>\nme well","IsLabelDefault":false}],"Answers":{"1":{"Display":"1"},"2":{"Display":"2"},"3":{"Display":"3"},"4":{"Display":"4"},"5":{"Display":"5"}},"AnswerOrder":[1,2,3,4,5],"ChoiceDataExportTags":false,"QuestionID":"QID30"}},{"SurveyID":"SV_1NbeoeO3uH7Y1dH","Element":"SQ","PrimaryAttribute":"QID5","SecondaryAttribute":"The next 9 questions give different \"options\" with corresponding numbers which represent differen...","TertiaryAttribute":null,"Payload":{"QuestionText":"The next 9 questions give different \"options\" with corresponding numbers which represent different possible outcomes. Imagine that the first number of each option represents different possible outcomes for you, and the second number represents different outcomes for some other.&nbsp;<div><br><\/div><div>So, if you see, for instance, an option with the corresponding numbers (You: 330 Other: 500), then selecting that option would mean that you would prefer an outcome in which you receive 330 \"points\" and the other receives 500 \"points\" to the other presented options.<\/div><div><br><\/div><div>Imagine achieving a higher number of \"points\" is better, such that you would enjoy a higher number more than a lower number, as would the other. For the next 9 questions, please select which outcome you would most prefer.<\/div>","DefaultChoices":false,"DataExportTag":"Q5","QuestionType":"DB","Selector":"TB","Configuration":{"QuestionDescriptionOption":"UseText"},"QuestionDescription":"The next 9 questions give different \"options\" with corresponding numbers which represent differen...","ChoiceOrder":[],"Validation":{"Settings":{"Type":"None"}},"GradingData":[],"Language":[],"QuestionID":"QID5"}},{"SurveyID":"SV_1NbeoeO3uH7Y1dH","Element":"SQ","PrimaryAttribute":"QID64","SecondaryAttribute":"Vrpt informed consent document page 001","TertiaryAttribute":null,"Payload":{"QuestionText":"Vrpt informed consent document page 001","DefaultChoices":false,"DataExportTag":"Q64","QuestionType":"DB","Selector":"GRB","SubSelector":"WOTXB","Configuration":{"QuestionDescriptionOption":"UseText"},"QuestionDescription":"Vrpt informed consent document page 001","ChoiceOrder":[],"Validation":{"Settings":{"Type":"None"}},"GradingData":[],"Language":[],"Graphics":"IM_00bKwdiAkjVapGl","GraphicsDescription":"Vrpt informed consent document page 001","QuestionID":"QID64"}},{"SurveyID":"SV_1NbeoeO3uH7Y1dH","Element":"SQ","PrimaryAttribute":"QID65","SecondaryAttribute":"Vrpt informed consent document page 001","TertiaryAttribute":null,"Payload":{"QuestionText":"Vrpt informed consent document page 001","DefaultChoices":false,"DataExportTag":"Q65","QuestionID":"QID65","QuestionType":"DB","Selector":"GRB","SubSelector":"WOTXB","Configuration":{"QuestionDescriptionOption":"UseText"},"QuestionDescription":"Vrpt informed consent document page 001","ChoiceOrder":[],"Validation":{"Settings":{"Type":"None"}},"GradingData":[],"Language":[],"Graphics":"IM_4T4zh2khhzYMTgF","GraphicsDescription":"Vrpt informed consent document page 001"}},{"SurveyID":"SV_1NbeoeO3uH7Y1dH","Element":"SQ","PrimaryAttribute":"QID36","SecondaryAttribute":"What color are the walls of your bedroom?","TertiaryAttribute":null,"Payload":{"QuestionText":"What color are the walls of your bedroom?","DefaultChoices":false,"DataExportTag":"Q36","QuestionID":"QID36","QuestionType":"TE","Selector":"SL","Configuration":{"QuestionDescriptionOption":"UseText"},"QuestionDescription":"What color are the walls of your bedroom?","Validation":{"Settings":{"ForceResponse":"OFF","ForceResponseType":"ON","Type":"None"}},"GradingData":[],"Language":[]}},{"SurveyID":"SV_1NbeoeO3uH7Y1dH","Element":"SQ","PrimaryAttribute":"QID57","SecondaryAttribute":"What color are your eyes?","TertiaryAttribute":null,"Payload":{"QuestionText":"What color are your eyes?","DefaultChoices":false,"DataExportTag":"Q57","QuestionType":"TE","Selector":"SL","Configuration":{"QuestionDescriptionOption":"UseText"},"QuestionDescription":"What color are your eyes?","Validation":{"Settings":{"ForceResponse":"OFF","ForceResponseType":"ON","Type":"None"}},"GradingData":[],"Language":[],"QuestionID":"QID57"}},{"SurveyID":"SV_1NbeoeO3uH7Y1dH","Element":"SQ","PrimaryAttribute":"QID56","SecondaryAttribute":"What color is your hair?","TertiaryAttribute":null,"Payload":{"QuestionText":"What color is your hair?","DefaultChoices":false,"DataExportTag":"Q56","QuestionType":"TE","Selector":"SL","Configuration":{"QuestionDescriptionOption":"UseText"},"QuestionDescription":"What color is your hair?","Validation":{"Settings":{"ForceResponse":"OFF","ForceResponseType":"ON","Type":"None"}},"GradingData":[],"Language":[],"QuestionID":"QID56"}},{"SurveyID":"SV_1NbeoeO3uH7Y1dH","Element":"SQ","PrimaryAttribute":"QID33","SecondaryAttribute":"What do you consider to be your hometown?","TertiaryAttribute":null,"Payload":{"QuestionText":"What do you consider to be your hometown?","DefaultChoices":false,"DataExportTag":"Q33","QuestionType":"TE","Selector":"SL","Configuration":{"QuestionDescriptionOption":"UseText"},"QuestionDescription":"What do you consider to be your hometown?","Validation":{"Settings":{"ForceResponse":"OFF","ForceResponseType":"ON","Type":"None"}},"GradingData":[],"Language":[],"QuestionID":"QID33"}},{"SurveyID":"SV_1NbeoeO3uH7Y1dH","Element":"SQ","PrimaryAttribute":"QID40","SecondaryAttribute":"What is your favorite color in general?","TertiaryAttribute":null,"Payload":{"QuestionText":"What is your favorite color in general?","DefaultChoices":false,"DataExportTag":"Q40","QuestionID":"QID40","QuestionType":"TE","Selector":"SL","Configuration":{"QuestionDescriptionOption":"UseText"},"QuestionDescription":"What is your favorite color in general?","Validation":{"Settings":{"ForceResponse":"OFF","ForceResponseType":"ON","Type":"None"}},"GradingData":[],"Language":[]}},{"SurveyID":"SV_1NbeoeO3uH7Y1dH","Element":"SQ","PrimaryAttribute":"QID41","SecondaryAttribute":"What is your favorite color shirt to wear?","TertiaryAttribute":null,"Payload":{"QuestionText":"What is your favorite color shirt to wear?","DefaultChoices":false,"DataExportTag":"Q41","QuestionID":"QID41","QuestionType":"TE","Selector":"SL","Configuration":{"QuestionDescriptionOption":"UseText"},"QuestionDescription":"What is your favorite color shirt to wear?","Validation":{"Settings":{"ForceResponse":"OFF","ForceResponseType":"ON","Type":"None"}},"GradingData":[],"Language":[]}},{"SurveyID":"SV_1NbeoeO3uH7Y1dH","Element":"SQ","PrimaryAttribute":"QID32","SecondaryAttribute":"What is your first name?","TertiaryAttribute":null,"Payload":{"QuestionText":"What is your first name?","DefaultChoices":false,"DataExportTag":"Q32","QuestionType":"TE","Selector":"SL","Configuration":{"QuestionDescriptionOption":"UseText"},"QuestionDescription":"What is your first name?","Validation":{"Settings":{"ForceResponse":"OFF","ForceResponseType":"ON","Type":"None"}},"GradingData":[],"Language":[],"QuestionID":"QID32"}},{"SurveyID":"SV_1NbeoeO3uH7Y1dH","Element":"SQ","PrimaryAttribute":"QID49","SecondaryAttribute":"What is your highest level of education achieved?","TertiaryAttribute":null,"Payload":{"QuestionText":"What is your highest level of education achieved?","DefaultChoices":false,"DataExportTag":"Q49","QuestionID":"QID49","QuestionType":"MC","Selector":"SAVR","SubSelector":"TX","Configuration":{"QuestionDescriptionOption":"UseText"},"QuestionDescription":"What is your highest level of education achieved?","Choices":{"1":{"Display":"Less than high school"},"2":{"Display":"High school graduate"},"3":{"Display":"Some college"},"4":{"Display":"2 year degree"},"5":{"Display":"4 year degree"},"6":{"Display":"Professional degree"},"7":{"Display":"Doctorate"}},"ChoiceOrder":["1","2","3","4","5","6","7"],"Validation":{"Settings":{"ForceResponse":"OFF","ForceResponseType":"ON","Type":"None"}},"GradingData":[],"Language":[]}},{"SurveyID":"SV_1NbeoeO3uH7Y1dH","Element":"SQ","PrimaryAttribute":"QID55","SecondaryAttribute":"What is your hopeful future career?","TertiaryAttribute":null,"Payload":{"QuestionText":"What is your hopeful future career?","DefaultChoices":false,"DataExportTag":"Q55","QuestionType":"TE","Selector":"SL","Configuration":{"QuestionDescriptionOption":"UseText"},"QuestionDescription":"What is your hopeful future career?","Validation":{"Settings":{"ForceResponse":"OFF","ForceResponseType":"ON","Type":"None"}},"GradingData":[],"Language":[],"QuestionID":"QID55"}},{"SurveyID":"SV_1NbeoeO3uH7Y1dH","Element":"SQ","PrimaryAttribute":"QID43","SecondaryAttribute":"What kind of music do you like?","TertiaryAttribute":null,"Payload":{"QuestionText":"What kind of music do you like?","DefaultChoices":false,"DataExportTag":"Q43","QuestionID":"QID43","QuestionType":"TE","Selector":"SL","Configuration":{"QuestionDescriptionOption":"UseText"},"QuestionDescription":"What kind of music do you like?","Validation":{"Settings":{"ForceResponse":"OFF","ForceResponseType":"ON","Type":"None"}},"GradingData":[],"Language":[]}},{"SurveyID":"SV_1NbeoeO3uH7Y1dH","Element":"SQ","PrimaryAttribute":"QID70","SecondaryAttribute":"What kind of workouts do you typically do? ","TertiaryAttribute":null,"Payload":{"QuestionText":"What kind of workouts do you typically do?&nbsp;","DefaultChoices":false,"DataExportTag":"Q70","QuestionID":"QID70","QuestionType":"TE","Selector":"ML","Configuration":{"QuestionDescriptionOption":"UseText","InputWidth":588,"InputHeight":84},"QuestionDescription":"What kind of workouts do you typically do? ","Validation":{"Settings":{"ForceResponse":"OFF","ForceResponseType":"ON","Type":"None"}},"GradingData":[],"Language":[],"DisplayLogic":{"0":{"0":{"LogicType":"Question","QuestionID":"QID39","QuestionIsInLoop":"no","ChoiceLocator":"q:\/\/QID39\/SelectableChoice\/1","Operator":"Selected","QuestionIDFromLocator":"QID39","LeftOperand":"q:\/\/QID39\/SelectableChoice\/1","Type":"Expression","Description":"<span class=\"ConjDesc\">If<\/span> <span class=\"QuestionDesc\">Do you exercise regularly?&amp;nbsp;<\/span> <span class=\"LeftOpDesc\">Yes<\/span> <span class=\"OpDesc\">Is Selected<\/span> "},"Type":"If"},"Type":"BooleanExpression","inPage":false}}},{"SurveyID":"SV_1NbeoeO3uH7Y1dH","Element":"SQ","PrimaryAttribute":"QID77","SecondaryAttribute":"Where do you typically work out? If it is a gym on campus, which gym?","TertiaryAttribute":null,"Payload":{"QuestionText":"Where do you typically work out? If it is a gym on campus, which gym?","DefaultChoices":false,"DataExportTag":"Q77","QuestionType":"TE","Selector":"SL","Configuration":{"QuestionDescriptionOption":"UseText"},"QuestionDescription":"Where do you typically work out? If it is a gym on campus, which gym?","Validation":{"Settings":{"ForceResponse":"OFF","ForceResponseType":"ON","Type":"None"}},"GradingData":[],"Language":[],"QuestionID":"QID77","DisplayLogic":{"0":{"0":{"LogicType":"Question","QuestionID":"QID39","QuestionIsInLoop":"no","ChoiceLocator":"q:\/\/QID39\/SelectableChoice\/1","Operator":"Selected","QuestionIDFromLocator":"QID39","LeftOperand":"q:\/\/QID39\/SelectableChoice\/1","Type":"Expression","Description":"<span class=\"ConjDesc\">If<\/span> <span class=\"QuestionDesc\">Do you exercise regularly?&amp;nbsp;<\/span> <span class=\"LeftOpDesc\">Yes<\/span> <span class=\"OpDesc\">Is Selected<\/span> "},"Type":"If"},"Type":"BooleanExpression","inPage":false}}},{"SurveyID":"SV_1NbeoeO3uH7Y1dH","Element":"SQ","PrimaryAttribute":"QID74","SecondaryAttribute":"Which dorm do you live in?","TertiaryAttribute":null,"Payload":{"QuestionText":"Which dorm do you live in?","DefaultChoices":false,"DataExportTag":"Q74","QuestionType":"TE","Selector":"SL","Configuration":{"QuestionDescriptionOption":"UseText"},"QuestionDescription":"Which dorm do you live in?","Validation":{"Settings":{"ForceResponse":"OFF","ForceResponseType":"ON","Type":"None"}},"GradingData":[],"Language":[],"QuestionID":"QID74","DisplayLogic":{"0":{"0":{"LogicType":"Question","QuestionID":"QID35","QuestionIsInLoop":"no","ChoiceLocator":"q:\/\/QID35\/SelectableChoice\/1","Operator":"Selected","QuestionIDFromLocator":"QID35","LeftOperand":"q:\/\/QID35\/SelectableChoice\/1","Type":"Expression","Description":"<span class=\"ConjDesc\">If<\/span> <span class=\"QuestionDesc\">Do you live in a dorm on campus? If so, which dorm do you live in? If not, please offer a brief d...<\/span> <span class=\"LeftOpDesc\">Yes<\/span> <span class=\"OpDesc\">Is Selected<\/span> "},"Type":"If"},"Type":"BooleanExpression","inPage":false}}},{"SurveyID":"SV_1NbeoeO3uH7Y1dH","Element":"SQ","PrimaryAttribute":"QID3","SecondaryAttribute":"Which race do you most closely identify as?","TertiaryAttribute":null,"Payload":{"QuestionText":"Which race do you most closely identify as?","DataExportTag":"Q3","QuestionType":"MC","Selector":"SAVR","SubSelector":"TX","Configuration":{"QuestionDescriptionOption":"UseText"},"QuestionDescription":"Which race do you most closely identify as?","Choices":{"1":{"Display":"Black or African-American"},"2":{"Display":"American Indian or Alaskan Native"},"3":{"Display":"Asian"},"4":{"Display":"White"},"5":{"Display":"Hawaiian Northern & Pacific Islander"},"6":{"Display":"Some Other"}},"ChoiceOrder":[1,2,3,4,5,6],"Validation":{"Settings":{"ForceResponse":"OFF","ForceResponseType":"ON","Type":"None"}},"Language":[],"QuestionID":"QID3"}},{"SurveyID":"SV_1NbeoeO3uH7Y1dH","Element":"SQ","PrimaryAttribute":"QID34","SecondaryAttribute":"Who do you consider to be in your immediate family? Please share their relations to you (mother,...","TertiaryAttribute":null,"Payload":{"QuestionText":"Who do you consider to be in your immediate family? Please share their relations to you (mother, father, sister, etc) and their first names.","DefaultChoices":false,"DataExportTag":"Q34","QuestionType":"TE","Selector":"ESTB","Configuration":{"QuestionDescriptionOption":"UseText","InputWidth":680,"InputHeight":201},"QuestionDescription":"Who do you consider to be in your immediate family? Please share their relations to you (mother,...","Validation":{"Settings":{"ForceResponse":"OFF","ForceResponseType":"ON","Type":"None"}},"GradingData":[],"Language":[],"QuestionID":"QID34"}},{"SurveyID":"SV_1NbeoeO3uH7Y1dH","Element":"SQ","PrimaryAttribute":"QID72","SecondaryAttribute":"You will now sign up for the in-lab session. You will need to select a time and enter the informa...","TertiaryAttribute":null,"Payload":{"QuestionText":"<div><span style=\"font-size:22px;\"><strong>You will now sign up for the in-lab session. You will need to select a time and enter the information it requests to confirm your booking. It will ask for your \"Participant Code,\" which we've listed for you below. Make sure to click \"CONFIRM BOOKING\" and ALSO the submit button on this Qualtrics form after.<\/strong><\/span><\/div><span style=\"font-size:22px;\"><strong><div><span style=\"font-size:22px;\"><strong><br><\/strong><\/span><\/div>Your Participant Code is: ${e:\/\/Field\/ResponseID}<\/strong><\/span>","DefaultChoices":false,"DataExportTag":"Q72","QuestionID":"QID72","QuestionType":"DB","Selector":"TB","Configuration":{"QuestionDescriptionOption":"UseText"},"QuestionDescription":"You will now sign up for the in-lab session. You will need to select a time and enter the informa...","ChoiceOrder":[],"Validation":{"Settings":{"Type":"None"}},"GradingData":[],"Language":[]}}]}
